# Supplementary material
Source: PubMed Central journal article supplement (PMC3291475)
Supplement: NIHMS352406-supplement-02.pdf [file NIHMS352406-supplement-02.pdf]

A

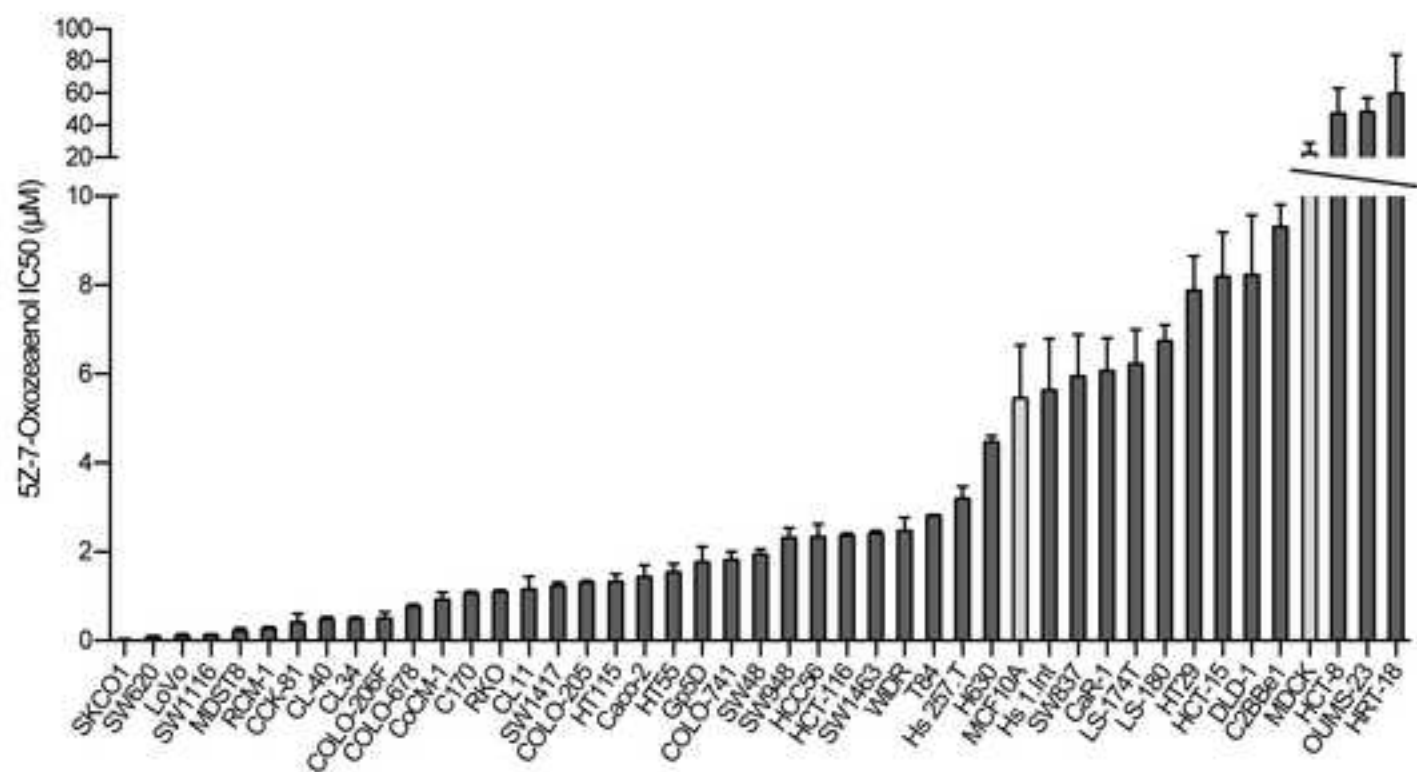

B

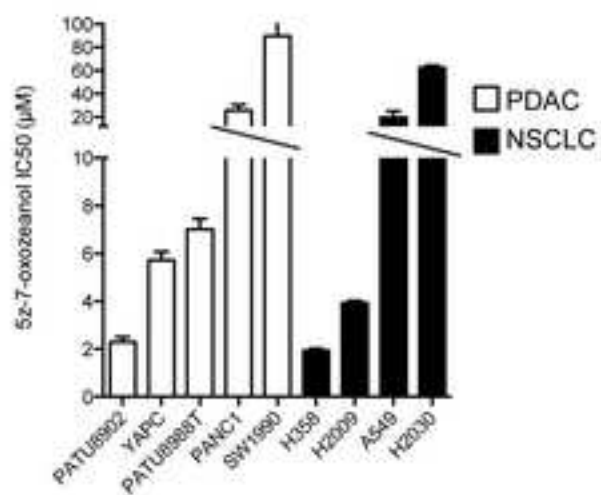

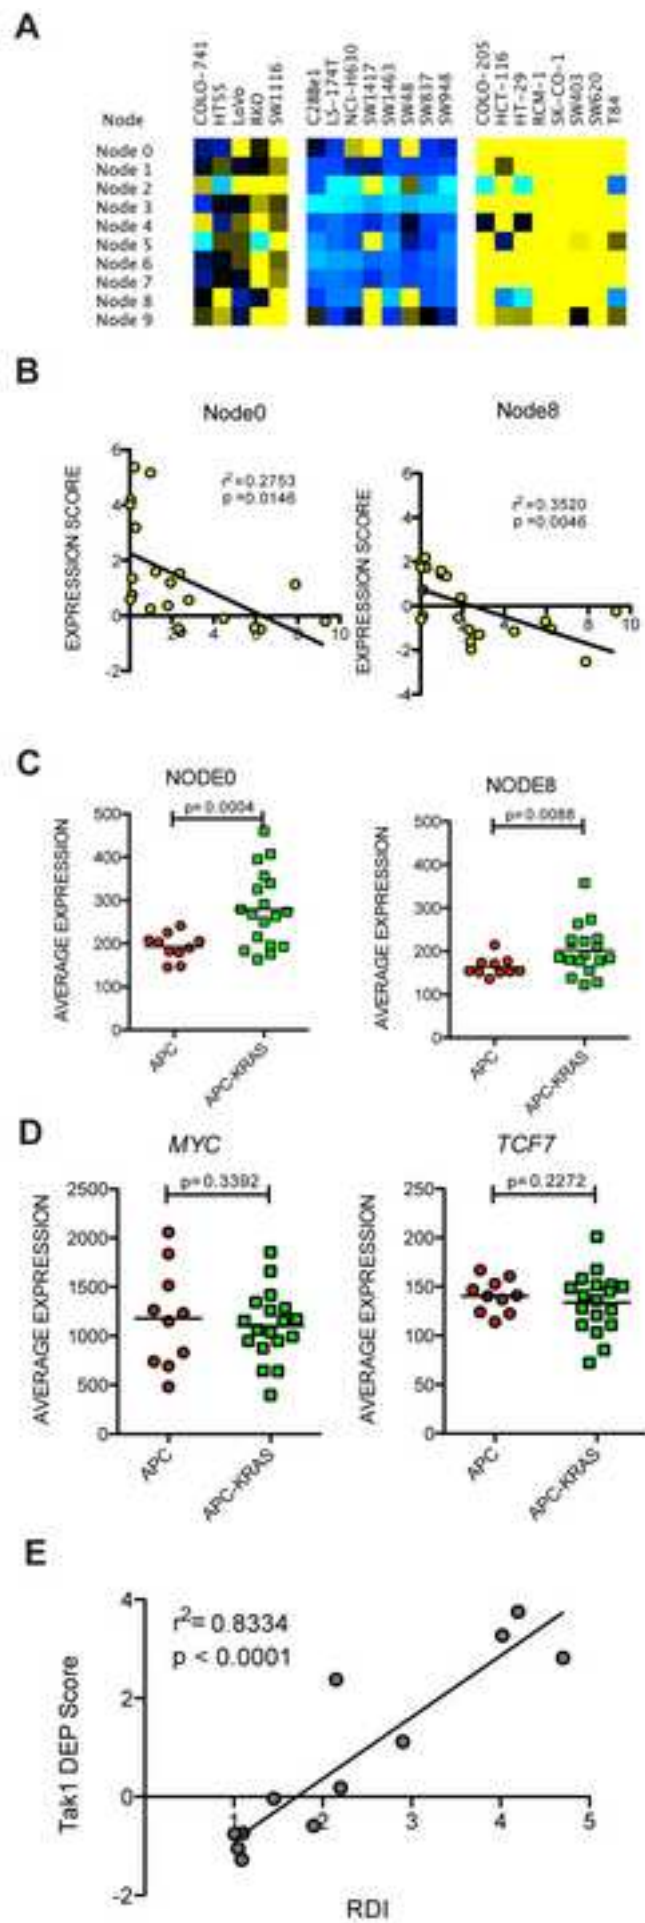

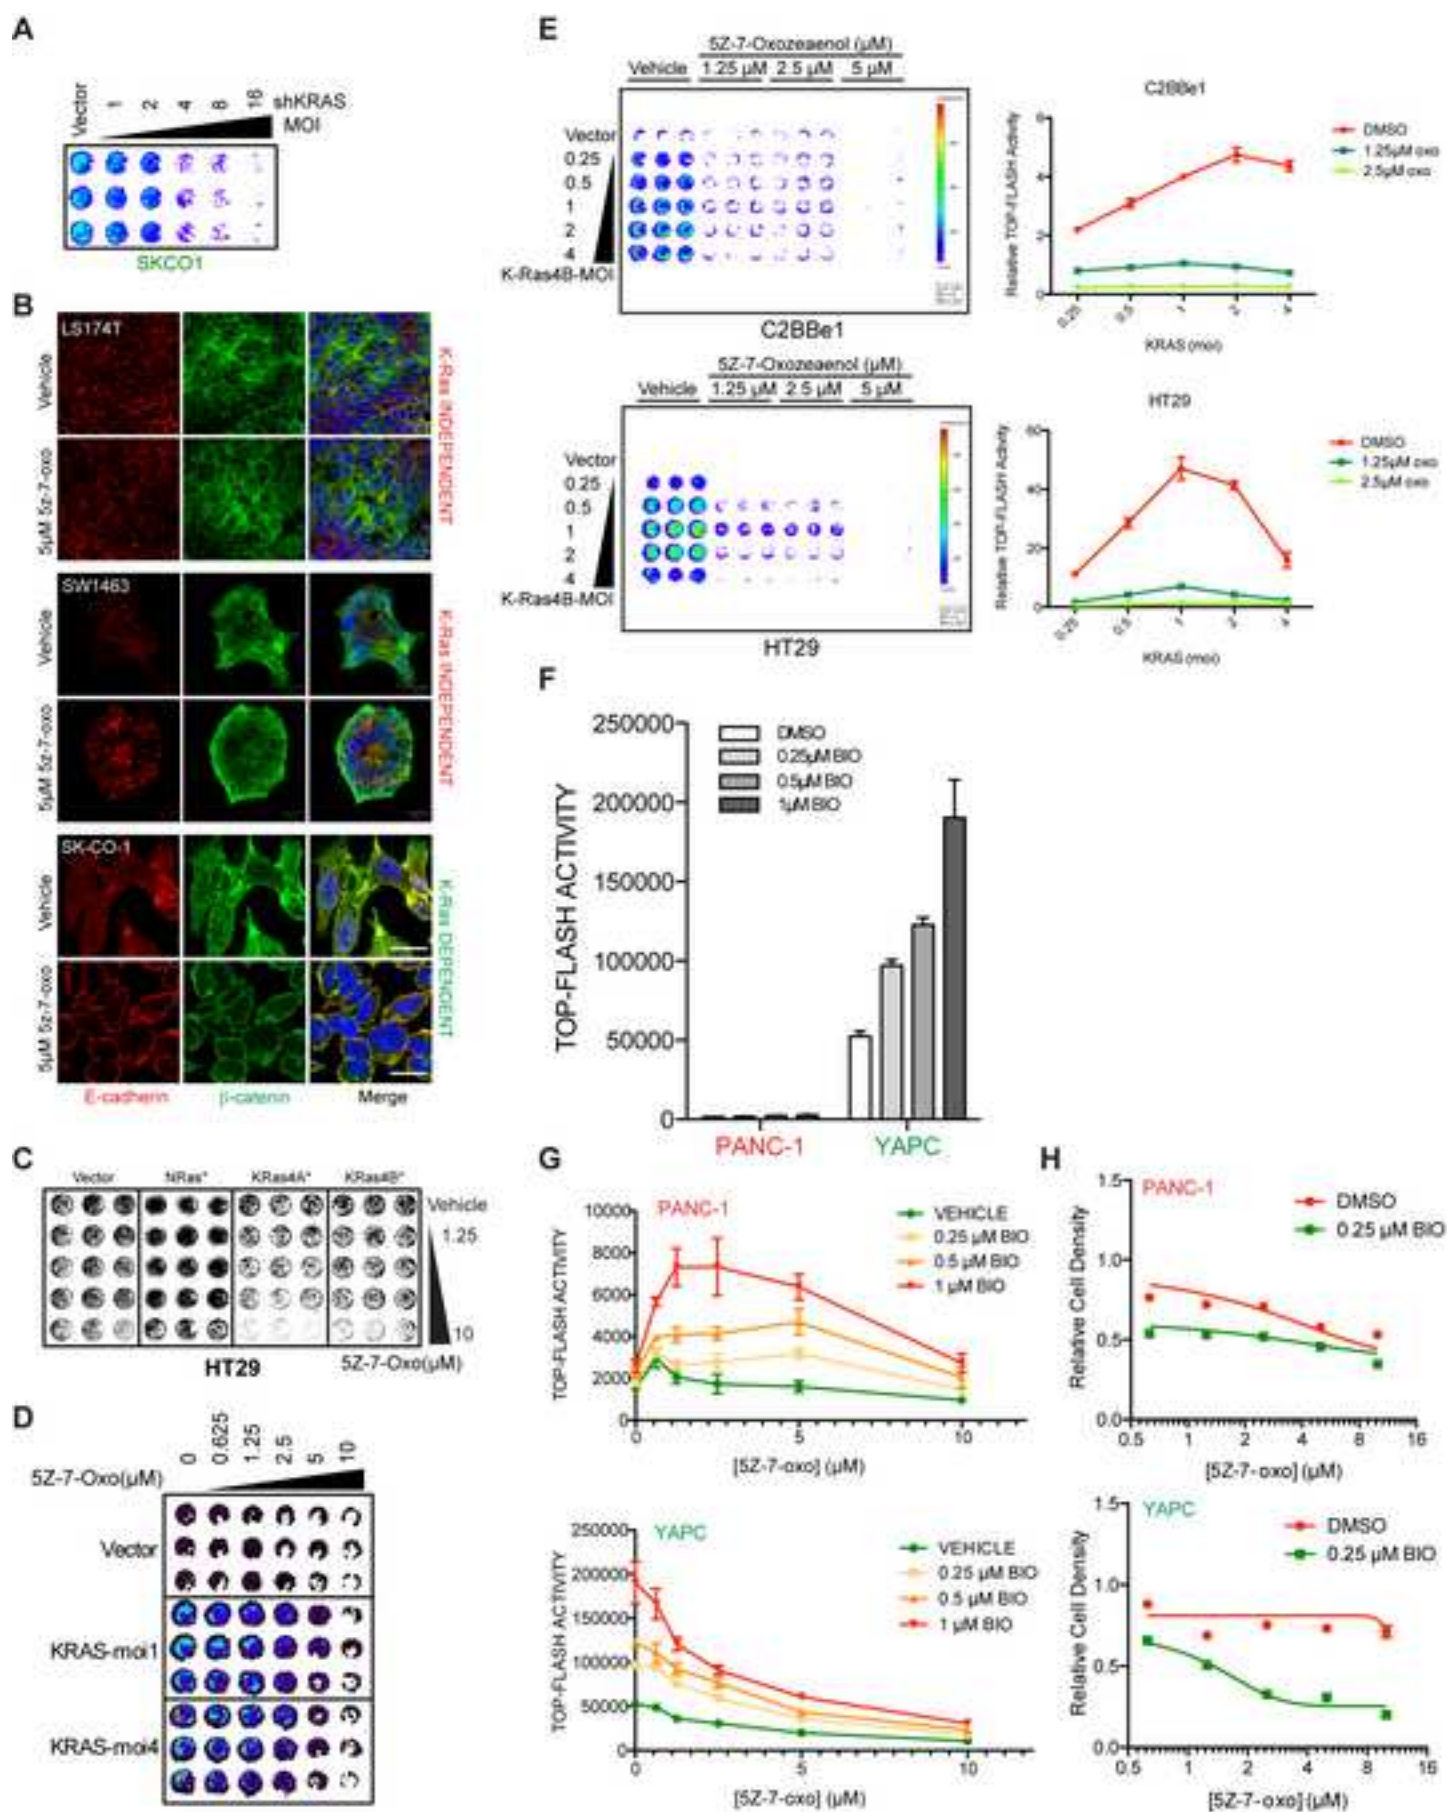



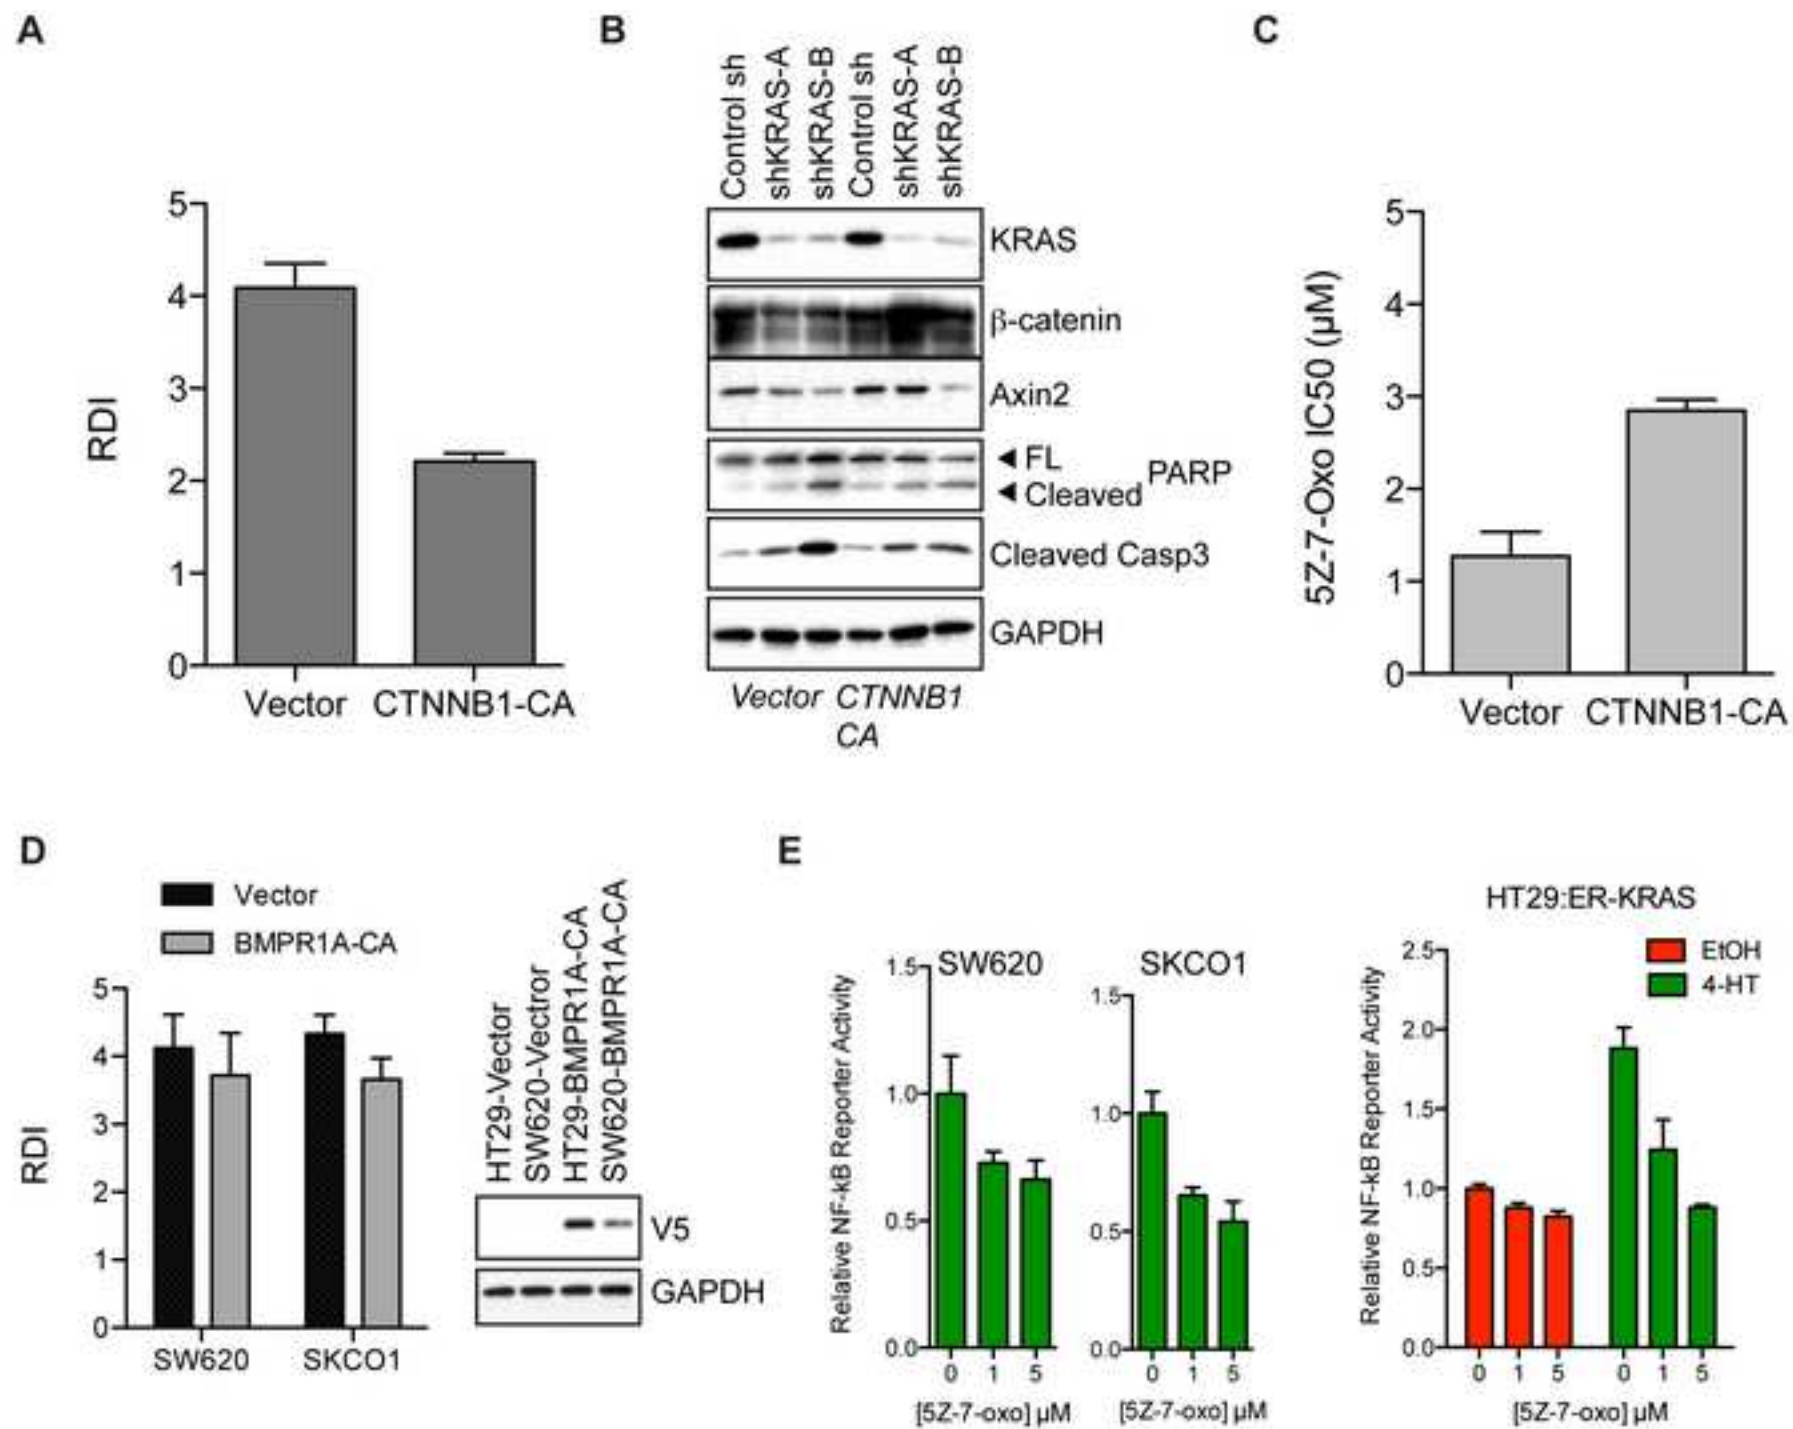

**Table S1.** Differentially expressed probesets comparing K-Ras independent to K-Ras dependent CRC cells. Probesets with p-values <0.05 and fold expression either >2 (DEP genes) or <0.5 (IND genes) were selected. DEP score is the product of  $-\log(\text{p-value})$  and  $\log(\text{fold difference})$  for each probeset. DEP score >0 indicates association with K-Ras dependency whereas <0 indicates association with K-Ras independency.

| Affy ID     | SYMBOL   | -log P-Value | log2 fold   | DEP SCORE   |
|-------------|----------|--------------|-------------|-------------|
| 203423_at   | RBP1     | 1.388637364  | 8.527651438 | 11.84181542 |
| 216033_s_at | FYN      | 2.048943293  | 6.501224991 | 13.32064134 |
| 207401_at   | PROX1    | 1.533913479  | 6.401660749 | 9.819593713 |
| 205258_at   | INHBB    | 2.217613379  | 6.137184273 | 13.60990195 |
| 213807_x_at | MET      | 2.385082397  | 6.129775503 | 14.62001965 |
| 206805_at   | SEMA3A   | 1.510672241  | 5.974567863 | 9.025613822 |
| 203998_s_at | SYT1     | 2.303851319  | 5.840599597 | 13.45587308 |
| 210517_s_at | AKAP12   | 2.998547598  | 5.776620589 | 17.32147179 |
| 211599_x_at | MET      | 2.711183799  | 5.625353962 | 15.25136853 |
| 87100_at    | ABHD2    | 3.03976234   | 5.510298455 | 16.74999773 |
| 220892_s_at | PSAT1    | 1.494042004  | 5.501729942 | 8.219815629 |
| 204427_s_at | TMED2    | 3.410253531  | 5.240983887 | 17.8730838  |
| 214617_at   | PRF1     | 1.492755869  | 5.218989255 | 7.790676841 |
| 206429_at   | F2RL1    | 5.894894854  | 5.057501819 | 29.81344144 |
| 200769_s_at | MAT2A    | 2.451948435  | 5.005493428 | 12.27321178 |
| 205778_at   | KLK7     | 1.50716922   | 4.99229245  | 7.524229515 |
| 210105_s_at | FYN      | 2.202114206  | 4.940476364 | 10.87949319 |
| 203999_at   | SYT1     | 1.809260254  | 4.890328037 | 8.847876143 |
| 219836_at   | ZBED2    | 1.327827039  | 4.762526155 | 6.323811001 |
| 220477_s_at | C20orf30 | 2.155843977  | 4.747956672 | 10.2358538  |
| 212486_s_at | FYN      | 1.380636098  | 4.724256984 | 6.522479727 |
| 209568_s_at | RGL1     | 1.767576997  | 4.682180173 | 8.276113969 |
| 205003_at   | DOCK4    | 2.538475677  | 4.66282114  | 11.83645805 |
| 205499_at   | SRPX2    | 1.347942404  | 4.628490449 | 6.238938545 |
| 204602_at   | DKK1     | 1.431478239  | 4.590141984 | 6.570688365 |
| 200008_s_at | GDI2     | 3.115798809  | 4.522639639 | 14.0916352  |
| 214240_at   | GAL      | 1.763409072  | 4.494668455 | 7.925939131 |
| 217294_s_at | ENO1     | 3.356636712  | 4.491641261 | 15.07680795 |
| 212009_s_at | STIP1    | 3.884154907  | 4.476353268 | 17.38684951 |
| 201211_s_at | DDX3X    | 1.313458563  | 4.430494797 | 5.819271329 |
| 215913_s_at | GULP1    | 3.105008429  | 4.387014636 | 13.62171742 |
| 207610_s_at | EMR2     | 1.352274425  | 4.368127116 | 5.906906583 |
| 215236_s_at | PICALM   | 2.406109724  | 4.33056696  | 10.41981927 |
| 213872_at   | None     | 2.364272468  | 4.303081499 | 10.17365712 |
| 214581_x_at | TNFRSF21 | 1.923544502  | 4.268596226 | 8.210834801 |
| 210904_s_at | IL13RA1  | 3.861406088  | 4.258624955 | 16.44428033 |
| 212097_at   | CAV1     | 2.185744895  | 4.244063435 | 9.276439988 |
| 201971_s_at | ATP6V1A  | 2.620516315  | 4.240826542 | 11.11315514 |
| 203186_s_at | S100A4   | 1.304568687  | 4.220869436 | 5.506414099 |
| 203357_s_at | CAPN7    | 3.022490256  | 4.181515342 | 12.63858938 |
| 221428_s_at | TBL1XR1  | 2.763153093  | 4.166893201 | 11.51376384 |
| 203065_s_at | CAV1     | 2.225352654  | 4.141469202 | 9.216229481 |
| 202444_s_at | ERLIN1   | 3.055303322  | 4.132579462 | 12.62628376 |
| 202129_s_at | RIOK3    | 3.240104394  | 4.121139387 | 13.35292184 |
| 208608_s_at | SNTB1    | 1.567062689  | 4.109097125 | 6.439212788 |
| 221268_s_at | SGPP1    | 2.259789665  | 4.106443143 | 9.279697774 |
| 204128_s_at | RFC3     | 4.253038512  | 4.092487588 | 17.40550732 |
| 211450_s_at | MSH6     | 3.342223306  | 4.085201706 | 13.65365635 |
| 218748_s_at | EXOC5    | 2.039130307  | 4.082041998 | 8.323815553 |
| 201476_s_at | RRM1     | 3.614101322  | 4.065613804 | 14.69354022 |
| 200641_s_at | YWHAZ    | 3.366537158  | 4.06443244  | 13.68306284 |
| 211090_s_at | PRPF4B   | 2.075214076  | 4.044729164 | 8.393678895 |
| 213548_s_at | CDV3     | 1.770641182  | 4.034850552 | 7.144272549 |

|             |           |             |             |             |
|-------------|-----------|-------------|-------------|-------------|
| 221618_s_at | TAF9B     | 1.441898317 | 3.977758596 | 5.735523427 |
| 205555_s_at | MSX2      | 1.677936814 | 3.970888    | 6.66289916  |
| 210317_s_at | YWHAE     | 2.618092011 | 3.962691069 | 10.37468983 |
| 202990_at   | PYGL      | 2.421598932 | 3.951518783 | 9.568993662 |
| 203304_at   | BAMBI     | 1.790298272 | 3.946624477 | 7.065634983 |
| 220658_s_at | ARNTL2    | 2.096237772 | 3.944800003 | 8.269238769 |
| 218182_s_at | CLDN1     | 2.358392024 | 3.911617591 | 9.225127726 |
| 210154_at   | ME2       | 1.74734127  | 3.909863312 | 6.831865525 |
| 202593_s_at | GDE1      | 3.01160269  | 3.892636311 | 11.72307399 |
| 217963_s_at | NGFRAP1   | 1.814936969 | 3.884883761 | 7.05081916  |
| 214845_s_at | CALU      | 2.339192622 | 3.875135475 | 9.064688311 |
| 210639_s_at | ATG5      | 3.323431745 | 3.864945465 | 12.84488245 |
| 202784_s_at | NNT       | 2.260633315 | 3.855119534 | 8.715011653 |
| 201120_s_at | PGRMC1    | 3.333097434 | 3.831669307 | 12.77132714 |
| 214959_s_at | API5      | 2.458987623 | 3.825659793 | 9.407250081 |
| 211574_s_at | CD46      | 2.686862781 | 3.82334363  | 10.2727997  |
| 206432_at   | HAS2      | 1.589504218 | 3.822941502 | 6.076581642 |
| 210734_x_at | MAX       | 2.922849508 | 3.807667697 | 11.12923966 |
| 202278_s_at | SPTLC1    | 3.347486294 | 3.802262401 | 12.72802128 |
| 218036_x_at | NMD3      | 4.136152583 | 3.79696537  | 15.70482812 |
| 204353_s_at | POT1      | 2.747366788 | 3.783417094 | 10.39443447 |
| 219132_at   | PELI2     | 1.540557654 | 3.764867468 | 5.799995395 |
| 202226_s_at | CRK       | 3.17436211  | 3.761156224 | 11.93927181 |
| 207620_s_at | CASK      | 2.928698184 | 3.759238903 | 11.00967615 |
| 212514_x_at | DDX3X     | 1.77451918  | 3.742080569 | 6.640393744 |
| 205542_at   | STEAP1    | 2.000234086 | 3.725714113 | 7.452300365 |
| 200756_x_at | CALU      | 2.280015988 | 3.723994537 | 8.490767081 |
| 201490_s_at | PIIF      | 3.097859978 | 3.689381174 | 11.42918628 |
| 214895_s_at | ADAM10    | 2.517388746 | 3.686910817 | 9.281387799 |
| 210543_s_at | PRKDC     | 2.976334387 | 3.681655524 | 10.95783794 |
| 220585_at   | HKDC1     | 1.98718113  | 3.681011319 | 7.314836232 |
| 203851_at   | IGFBP6    | 1.898886343 | 3.679449689 | 6.986856764 |
| 216266_s_at | ARFGEF1   | 2.387511479 | 3.678401441 | 8.782225665 |
| 210284_s_at | MAP3K7IP2 | 2.971274888 | 3.664169575 | 10.88725504 |
| 200712_s_at | MAPRE1    | 2.809140517 | 3.653839684 | 10.2641491  |
| 211363_s_at | MTAP      | 1.799517047 | 3.606493026 | 6.48994568  |
| 210529_s_at | FAM115A   | 3.297308504 | 3.597966321 | 11.86360495 |
| 209772_s_at | CD24      | 1.765995128 | 3.595404447 | 6.349466735 |
| 215037_s_at | BCL2L1    | 2.980484262 | 3.586153108 | 10.6884729  |
| 219856_at   | C1orf116  | 2.549659673 | 3.580418155 | 9.128847784 |
| 217301_x_at | RBBP4     | 3.009582336 | 3.567913933 | 10.73793075 |
| 211864_s_at | MYOF      | 2.000759183 | 3.56516601  | 7.133038635 |
| 221781_s_at | DNAJC10   | 2.364857856 | 3.564591209 | 8.429751524 |
| 220199_s_at | AIDA      | 3.42148789  | 3.549910623 | 12.14597621 |
| 214908_s_at | TRRAP     | 2.829115046 | 3.545211882 | 10.02981228 |
| 212092_at   | PEG10     | 1.57888619  | 3.541096814 | 5.590988855 |
| 206667_s_at | SCAMP1    | 1.8126988   | 3.535528859 | 6.40884892  |
| 211537_x_at | MAP3K7    | 2.514747804 | 3.535296666 | 8.890379529 |
| 206670_s_at | GAD1      | 1.561755304 | 3.52040984  | 5.49801874  |
| 202147_s_at | IFRD1     | 2.936923218 | 3.494661772 | 10.2635533  |
| 203323_at   | CAV2      | 2.911878109 | 3.492325891 | 10.16922731 |
| 218000_s_at | PHLDA1    | 1.352550246 | 3.486603012 | 4.715805761 |
| 212577_at   | SMCHD1    | 2.277562249 | 3.485321692 | 7.938037111 |
| 218156_s_at | TSR1      | 2.853540079 | 3.48060028  | 9.932032398 |
| 211668_s_at | PLAU      | 1.408870148 | 3.480337517 | 4.903343632 |
| 210655_s_at | FOXO3B    | 3.186757769 | 3.478200848 | 11.08418358 |
| 215033_at   | TM4SF1    | 2.615923605 | 3.476816416 | 9.095086133 |
| 218119_at   | TIMM23    | 2.891934346 | 3.475780562 | 10.05172919 |
| 202166_s_at | PPP1R2    | 2.818746564 | 3.463756806 | 9.763452595 |
| 208698_s_at | NONO      | 3.191694877 | 3.461153115 | 11.04694467 |
| 217999_s_at | PHLDA1    | 1.708991781 | 3.458448941 | 5.910460816 |



|                         |         |             |             |             |
|-------------------------|---------|-------------|-------------|-------------|
| 209765_at               | ADAM19  | 2.159425928 | 3.453207906 | 7.456946689 |
| 207563_s_at             | OGT     | 1.688144859 | 3.450939263 | 5.825685377 |
| 217998_at               | PHLDA1  | 1.428312932 | 3.441836889 | 4.916020137 |
| 210186_s_at             | FKBP1A  | 1.485254467 | 3.438243123 | 5.106665957 |
| 202143_s_at             | COPS8   | 3.203393823 | 3.432950921 | 10.99709377 |
| 204344_s_at             | SEC23A  | 2.407329316 | 3.414405756 | 8.219599072 |
| 218292_s_at             | PRKAG2  | 2.978019695 | 3.413230415 | 10.1646674  |
| 209080_x_at             | GLRX3   | 3.229562021 | 3.410673477 | 11.01498153 |
| 204989_s_at             | ITGB4   | 2.371378343 | 3.382979175 | 8.022323553 |
| 214168_s_at             | TJP1    | 3.21512782  | 3.380334425 | 10.86820725 |
| 221430_s_at             | RNF146  | 2.545057015 | 3.369988417 | 8.576812661 |
| 216685_s_at             | MTAP    | 1.831620474 | 3.367575036 | 6.168119383 |
| 214545_s_at             | PROSC   | 1.347317334 | 3.355653854 | 4.521130604 |
| 203210_s_at             | RFC5    | 2.596622924 | 3.352756139 | 8.705843451 |
| AFFX-HSAC07/X00351_5_at | ACTB    | 3.403706413 | 3.351420928 | 11.4072529  |
| 207079_s_at             | MED6    | 2.337696961 | 3.314737321 | 7.748851362 |
| 201742_x_at             | SFRS1   | 2.416488402 | 3.31323431  | 8.006392285 |
| 208403_x_at             | MAX     | 2.746392088 | 3.306371457 | 9.08059241  |
| 201337_s_at             | VAMP3   | 2.79685079  | 3.298103726 | 9.22430401  |
| 208811_s_at             | DNAJB6  | 4.28480004  | 3.293171736 | 14.11058239 |
| 217799_x_at             | UBE2H   | 2.805639953 | 3.292705069 | 9.238144896 |
| 203324_s_at             | CAV2    | 1.814602894 | 3.289192961 | 5.968579067 |
| 211905_s_at             | ITGB4   | 2.261189734 | 3.286733643 | 7.431928372 |
| 219710_at               | SH3TC2  | 1.413910749 | 3.277981621 | 4.634773448 |
| 214434_at               | HSPA12A | 2.104487589 | 3.26925592  | 6.88010851  |
| 207549_x_at             | CD46    | 2.760069373 | 3.263621149 | 9.007820778 |
| 204426_at               | TMED2   | 3.115876095 | 3.259250527 | 10.15542081 |
| 216125_s_at             | RANBP9  | 1.834417744 | 3.255854674 | 5.972597586 |
| 207782_s_at             | PSEN1   | 2.784683286 | 3.252441617 | 9.057019811 |
| 211536_x_at             | MAP3K7  | 2.541759138 | 3.237774902 | 8.229643942 |
| 215832_x_at             | PICALM  | 2.539895824 | 3.237168651 | 8.222071139 |
| 218853_s_at             | MOSPD1  | 2.289663735 | 3.224868313 | 7.383864027 |
| 213562_s_at             | SQLE    | 2.335789614 | 3.22136558  | 7.524432263 |
| 208316_s_at             | OCRL    | 2.723330084 | 3.191516658 | 8.691553326 |
| 207791_s_at             | RAB1A   | 3.343903839 | 3.183549558 | 10.64548359 |
| 209109_s_at             | TSPAN6  | 2.842243588 | 3.171072409 | 9.01296022  |
| 202955_s_at             | ARFGEF1 | 3.280043673 | 3.16447406  | 10.37961312 |
| 203328_x_at             | IDE     | 3.949802335 | 3.145367131 | 12.42357844 |
| 208290_s_at             | EIF5    | 3.401615579 | 3.141406397 | 10.68585694 |
| 210470_x_at             | NONO    | 2.734707534 | 3.129559607 | 8.558430235 |
| 201325_s_at             | EMP1    | 2.963693668 | 3.119524658 | 9.245315478 |
| 211676_s_at             | IFNGR1  | 5.551693008 | 3.107509298 | 17.25193764 |
| 213461_at               | NUDT21  | 1.374113452 | 3.096521416 | 4.254971733 |
| 209387_s_at             | TM4SF1  | 2.122145593 | 3.07422463  | 6.52395225  |
| 201179_s_at             | GNAI3   | 2.647466738 | 3.072277785 | 8.133753246 |
| 205659_at               | HDAC9   | 1.797075301 | 3.066099147 | 5.510011046 |
| 208447_s_at             | PRPS1   | 1.937018619 | 3.061450972 | 5.930087534 |
| 205965_at               | BATF    | 1.50839475  | 3.052500942 | 4.604376396 |
| 217356_s_at             | PGK1    | 3.661048121 | 3.046109521 | 11.15195354 |
| 200776_s_at             | BZW1L1  | 3.028444285 | 3.041513783 | 9.211055032 |
| 211518_s_at             | BMP4    | 1.374961135 | 3.041293543 | 4.181660421 |
| 208310_s_at             | FSTL1   | 2.579531185 | 3.039180515 | 7.839660914 |
| 210338_s_at             | HSPA8   | 4.929227306 | 3.037510359 | 14.972579   |
| 204147_s_at             | TFDP1   | 2.323968707 | 3.036904294 | 7.057670545 |
| 219121_s_at             | RBM35A  | 2.218074371 | 3.029579857 | 6.719833437 |
| 202583_s_at             | RANBP9  | 2.582289314 | 3.023294769 | 7.807021773 |
| 218122_s_at             | SENP2   | 1.35957994  | 3.021317969 | 4.107723304 |
| 219311_at               | CEP76   | 1.647516207 | 3.009282898 | 4.957842347 |
| 218439_s_at             | COMMD10 | 4.375709838 | 2.99875502  | 13.12168184 |
| 213348_at               | CDKN1C  | 1.622204842 | 2.998118875 | 4.863562957 |
| 202213_s_at             | CUL4B   | 2.017092632 | 2.997070192 | 6.045368203 |

|             |          |             |             |             |
|-------------|----------|-------------|-------------|-------------|
| 208852_s_at | CANX     | 2.23171428  | 2.991303927 | 6.675735691 |
| 210337_s_at | ACLY     | 2.248838056 | 2.985881028 | 6.714762888 |
| 203032_s_at | FH       | 2.446553329 | 2.982048605 | 7.295740942 |
| 213901_x_at | RBM9     | 3.604204602 | 2.979993434 | 10.74050605 |
| 210935_s_at | WDR1     | 2.871404135 | 2.97377852  | 8.53891994  |
| 208651_x_at | CD24     | 1.355984312 | 2.95899375  | 4.012349103 |
| 205730_s_at | ABLIM3   | 1.675738338 | 2.957147724 | 4.955405813 |
| 219326_s_at | B3GNT2   | 1.698818876 | 2.941421035 | 4.996941576 |
| 216976_s_at | RYK      | 2.935292946 | 2.93993342  | 8.629565831 |
| 208097_s_at | None     | 1.748572657 | 2.939520389 | 5.139964978 |
| 213652_at   | PCSK5    | 2.027550456 | 2.938885435 | 5.958738505 |
| 213470_s_at | HNRNPH1  | 2.509837555 | 2.935613637 | 7.367913354 |
| 209035_at   | MDK      | 1.834109435 | 2.929982536 | 5.373908614 |
| 218340_s_at | UBA6     | 1.775139538 | 2.926750806 | 5.195391074 |
| 201123_s_at | EIF5A    | 1.829895352 | 2.924523993 | 5.351572863 |
| 200722_s_at | CAPRIN1  | 2.599240646 | 2.914500279 | 7.575487589 |
| 207431_s_at | DEGS1    | 2.635317704 | 2.910198534 | 7.669297719 |
| 207627_s_at | TFCP2    | 2.296292999 | 2.885674483 | 6.626354114 |
| 201629_s_at | ACP1     | 2.961620036 | 2.877812459 | 8.52298704  |
| 203157_s_at | GLS      | 2.470649137 | 2.87142717  | 7.094289061 |
| 210896_s_at | ASPH     | 1.468049381 | 2.866244415 | 4.207788338 |
| 209624_s_at | MCCC2    | 4.044606414 | 2.863170864 | 11.58039924 |
| 207821_s_at | PTK2     | 1.872000392 | 2.853475823 | 5.341707857 |
| 217777_s_at | PTPLAD1  | 1.830832337 | 2.849188557 | 5.216386545 |
| 215794_x_at | GLUD2    | 2.669933128 | 2.847985458 | 7.603930723 |
| 201250_s_at | SLC2A1   | 1.451389778 | 2.843722918 | 4.127350374 |
| 209363_s_at | MED21    | 2.009657407 | 2.836828915 | 5.701054242 |
| 201551_s_at | LAMP1    | 3.040247778 | 2.832218091 | 8.610644757 |
| 200813_s_at | PAFAH1B1 | 1.31934818  | 2.828729063 | 3.732078541 |
| 202236_s_at | SLC16A1  | 2.139868335 | 2.823150646 | 6.041170673 |
| 212521_s_at | PDE8A    | 3.146631758 | 2.817017041 | 8.864115287 |
| 220918_at   | C21orf96 | 1.454341149 | 2.814477426 | 4.093210334 |
| 220924_s_at | SLC38A2  | 1.701378422 | 2.808734202 | 4.778719765 |
| 211744_s_at | CD58     | 2.015120543 | 2.804433619 | 5.651271797 |
| 201504_s_at | TSN      | 2.400750926 | 2.80259961  | 6.728343607 |
| 217811_at   | SELT     | 3.665841049 | 2.801711253 | 10.27062812 |
| 202829_s_at | VAMP7    | 1.354287268 | 2.801308596 | 3.793776566 |
| 219599_at   | EIF4B    | 1.875035313 | 2.797820789 | 5.246012779 |
| 211016_x_at | HSPA4    | 1.864305044 | 2.790855083 | 5.203005207 |
| 209316_s_at | HBS1L    | 2.807142852 | 2.789638322 | 7.830913274 |
| 209653_at   | KPNA4    | 2.048515723 | 2.77941314  | 5.693671519 |
| 218224_at   | PNMA1    | 2.091149848 | 2.77711112  | 5.807355496 |
| 219015_s_at | ALG13    | 2.483152963 | 2.775784747 | 6.89269812  |
| 201823_s_at | RNF14    | 2.544802204 | 2.775497676 | 7.063092604 |
| 210156_s_at | PCMT1    | 2.803090582 | 2.774494832 | 7.777160332 |
| 206669_at   | GAD1     | 2.795769572 | 2.756524353 | 7.706606912 |
| 201259_s_at | SYPL1    | 2.335524228 | 2.756015839 | 6.436741763 |
| 212008_at   | UBXN4    | 2.248100504 | 2.749783765 | 6.181790268 |
| 211061_s_at | MGAT2    | 2.222428999 | 2.742924273 | 6.095954447 |
| 202576_s_at | DDX19B   | 1.389400749 | 2.740211536 | 3.807251961 |
| 208650_s_at | CD24     | 1.555261162 | 2.734065301 | 4.252185578 |
| 207983_s_at | STAG2    | 2.442850149 | 2.724576261 | 6.655731527 |
| 215997_s_at | CUL4B    | 1.35955932  | 2.717025868 | 3.693957843 |
| 210087_s_at | MPZL1    | 1.968771714 | 2.712911559 | 5.341103542 |
| 207108_s_at | NIPBL    | 3.46860902  | 2.704424429 | 9.380590969 |
| 210716_s_at | CLIP1    | 2.079804814 | 2.703555308 | 5.622867345 |
| 210830_s_at | PON2     | 2.368956997 | 2.697729501 | 6.390805178 |
| 217496_s_at | IDE      | 3.083787368 | 2.695151124 | 8.311272991 |
| 212595_s_at | DAZAP2   | 3.102157024 | 2.692435072 | 8.352356369 |
| 208860_s_at | ATRX     | 2.41994028  | 2.680977021 | 6.487804284 |
| 208853_s_at | CANX     | 1.408155374 | 2.670419331 | 3.760365332 |

|             |           |             |             |             |
|-------------|-----------|-------------|-------------|-------------|
| 218782_s_at | ATAD2     | 1.438189522 | 2.668679023 | 3.838066208 |
| 210257_x_at | CUL4B     | 1.910906647 | 2.664635683 | 5.09187004  |
| 211855_s_at | SLC25A14  | 1.535680971 | 2.660672984 | 4.085944871 |
| 216591_s_at | SDHC      | 2.642093846 | 2.651460438 | 7.005407305 |
| 206665_s_at | BCL2L1    | 2.130831115 | 2.649782086 | 5.646238116 |
| 218041_x_at | SLC38A2   | 1.602143389 | 2.632950837 | 4.218364778 |
| 203265_s_at | MAP2K4    | 2.79817085  | 2.631861092 | 7.364396988 |
| 217677_at   | PLEKHA2   | 3.338622883 | 2.629663139 | 8.779453533 |
| 213501_at   | ACOX1     | 2.912742338 | 2.616348682 | 7.620749577 |
| 206113_s_at | RAB5A     | 1.394989625 | 2.60981222  | 3.640660972 |
| 203207_s_at | MTFR1     | 1.650680606 | 2.60676898  | 4.302942999 |
| 201523_x_at | UBE2N     | 3.573131793 | 2.596214493 | 9.276616548 |
| 203968_s_at | CDC6      | 1.635366937 | 2.592546758 | 4.239765251 |
| 210153_s_at | ME2       | 1.479362928 | 2.590766902 | 3.832684511 |
| 209257_s_at | SMC3      | 2.90671947  | 2.587934249 | 7.522398867 |
| 211612_s_at | IL13RA1   | 1.846672682 | 2.583569452 | 4.771007128 |
| 206348_s_at | PDK3      | 1.317075708 | 2.578786122 | 3.396456556 |
| 211814_s_at | CCNE2     | 1.344799762 | 2.5787672   | 3.467925517 |
| 215034_s_at | TM4SF1    | 1.715789547 | 2.575303363 | 4.418678591 |
| 221039_s_at | ASAP1     | 1.887513969 | 2.573032144 | 4.856634113 |
| 212253_x_at | DST       | 2.048427116 | 2.567842648 | 5.260038508 |
| 216942_s_at | CD58      | 2.248309148 | 2.560591832 | 5.75700204  |
| 220494_s_at | None      | 2.019466439 | 2.556475603 | 5.162716682 |
| 208793_x_at | SMARCA4   | 1.898230418 | 2.549320282 | 4.839197305 |
| 210285_x_at | WTAP      | 2.71479325  | 2.54928201  | 6.920773595 |
| 218757_s_at | UPF3B     | 1.902711901 | 2.546177205 | 4.844641669 |
| 202585_s_at | NFX1      | 1.371388696 | 2.543253467 | 3.487789056 |
| 201835_s_at | PRKAB1    | 3.231898376 | 2.537466808 | 8.200834857 |
| 217996_at   | PHLDA1    | 1.530585265 | 2.534285412 | 3.878939909 |
| 203015_s_at | SSX2IP    | 1.813124096 | 2.53231979  | 4.591410029 |
| 206920_s_at | GLE1      | 2.036101799 | 2.527843312 | 5.146946314 |
| 217915_s_at | None      | 1.897120655 | 2.521668205 | 4.783908838 |
| 201988_s_at | CREBL2    | 1.698337846 | 2.517104668 | 4.27489412  |
| 215207_x_at | LOC729148 | 1.663274278 | 2.499589501 | 4.157502923 |
| 203311_s_at | ARF6      | 3.81985167  | 2.486518516 | 9.498131903 |
| 200751_s_at | HNRNPC    | 3.123392007 | 2.485149547 | 7.762096231 |
| 201881_s_at | ARIH1     | 2.029548595 | 2.484406032 | 5.042222772 |
| 211015_s_at | HSPA4     | 2.536679412 | 2.483403507 | 6.299598549 |
| 209360_s_at | RUNX1     | 2.244700125 | 2.478559153 | 5.56362204  |
| 219198_at   | GTF3C4    | 2.29436223  | 2.464953804 | 5.655496906 |
| 202731_at   | PDCD4     | 2.008658065 | 2.46483896  | 4.951018655 |
| 202101_s_at | RALB      | 3.316509824 | 2.463494861 | 8.170204906 |
| 201096_s_at | ARF4      | 3.205357754 | 2.462953137 | 7.894645937 |
| 200730_s_at | PTP4A1    | 1.632253317 | 2.460831812 | 4.016700888 |
| 216574_s_at | RPE       | 1.757576891 | 2.454788278 | 4.314479151 |
| 221220_s_at | SCYL2     | 1.591878604 | 2.454081474 | 3.906599792 |
| 217975_at   | WBP5      | 1.584602158 | 2.448688095 | 3.880196439 |
| 206303_s_at | NUDT4     | 1.493487318 | 2.447938249 | 3.65596473  |
| 209362_at   | MED21     | 1.741668564 | 2.443083737 | 4.255042143 |
| 202854_at   | HPRT1     | 2.660892766 | 2.441139569 | 6.495610621 |
| 221679_s_at | ABHD6     | 2.457229886 | 2.436674885 | 5.98747035  |
| 205780_at   | BIK       | 2.83066435  | 2.436353179 | 6.896498087 |
| 212379_at   | GART      | 1.807051188 | 2.431035976 | 4.393006447 |
| 210802_s_at | DIMT1L    | 1.961532507 | 2.425713755 | 4.758116384 |
| 204186_s_at | PPID      | 1.679127283 | 2.422212283 | 4.067202728 |
| 203373_at   | SOCS2     | 1.6321445   | 2.420295298 | 3.95027166  |
| 217791_s_at | ALDH18A1  | 2.160231977 | 2.419402313 | 5.226470242 |
| 209269_s_at | SYK       | 2.003269366 | 2.418789116 | 4.84548614  |
| 217445_s_at | GART      | 1.557131264 | 2.418426316 | 3.765807226 |
| 214553_s_at | ARPP-19   | 1.671158562 | 2.414797585 | 4.03550966  |
| 52285_f_at  | CEP76     | 1.357445194 | 2.409776082 | 3.27113896  |

|             |          |             |             |             |
|-------------|----------|-------------|-------------|-------------|
| 219960_s_at | UCHL5    | 1.443187816 | 2.408046722 | 3.475263689 |
| 201688_s_at | TPD52    | 2.23041242  | 2.407257327 | 5.369176642 |
| 206550_s_at | NUP155   | 1.734568336 | 2.404676347 | 4.17107545  |
| 221962_s_at | UBE2H    | 2.200089778 | 2.403600632 | 5.288137182 |
| 213789_at   | EBP      | 1.347948999 | 2.399909774 | 3.234955977 |
| 205401_at   | AGPS     | 1.899043625 | 2.396751099 | 4.551534895 |
| 204768_s_at | FEN1     | 2.853432567 | 2.39251101  | 6.826868832 |
| 202062_s_at | SEL1L    | 1.786498775 | 2.388446755 | 4.266957202 |
| 212515_s_at | DDX3X    | 2.143629095 | 2.38692176  | 5.116674932 |
| 201386_s_at | DHX15    | 4.710211933 | 2.377178903 | 11.19701644 |
| 206533_at   | CHRNA5   | 1.929510523 | 2.370924269 | 4.574723326 |
| 209091_s_at | SH3GLB1  | 2.018826391 | 2.366552136 | 4.777657909 |
| 205512_s_at | AIFM1    | 3.096291219 | 2.360614651 | 7.309150414 |
| 200628_s_at | WARS     | 1.968240988 | 2.354173823 | 4.633581411 |
| 218295_s_at | NUP50    | 1.432725276 | 2.352794991 | 3.370908852 |
| 222132_s_at | AGK      | 2.329140245 | 2.346429222 | 5.465162733 |
| 211114_x_at | SIP1     | 2.368446203 | 2.346279644 | 5.557037116 |
| 215113_s_at | SENP3    | 1.85536238  | 2.343663931 | 4.348345888 |
| 210779_x_at | SIP1     | 1.968284049 | 2.337205186 | 4.600283687 |
| 211689_s_at | TMPRSS2  | 1.502860928 | 2.336750884 | 3.511811601 |
| 202069_s_at | IDH3A    | 4.037717034 | 2.333393331 | 9.421582002 |
| 203214_x_at | CDC2     | 1.653732853 | 2.330440602 | 3.853926186 |
| 208810_at   | DNAJB6   | 3.794699349 | 2.328126684 | 8.834540812 |
| 212003_at   | C1orf144 | 2.243468566 | 2.327291655 | 5.221205671 |
| 202453_s_at | GTF2H1   | 1.68900152  | 2.32467095  | 3.926372768 |
| 219485_s_at | PSMD10   | 1.950185413 | 2.320677876 | 4.525752142 |
| 204312_x_at | CREB1    | 3.559027148 | 2.320434994 | 8.25849114  |
| 204045_at   | TCEAL1   | 1.822720503 | 2.306311507 | 4.203761269 |
| 212572_at   | STK38L   | 1.37207822  | 2.306271521 | 3.164384922 |
| 211563_s_at | C19orf2  | 2.295481398 | 2.296346595 | 5.271220891 |
| 209471_s_at | FNTA     | 2.799341434 | 2.28872284  | 6.406916678 |
| 211212_s_at | ORC5L    | 1.880651322 | 2.279600597 | 4.287133875 |
| 222192_s_at | C2orf43  | 1.768270341 | 2.278759116 | 4.029462159 |
| 202874_s_at | ATP6V1C1 | 2.331959631 | 2.277690456 | 5.311482197 |
| 202516_s_at | DLG1     | 2.070182966 | 2.275096232 | 4.709865467 |
| 208931_s_at | ILF3     | 2.272873368 | 2.271042653 | 5.161792365 |
| 210570_x_at | MAPK9    | 1.802584111 | 2.267520427 | 4.087396292 |
| 212016_s_at | PTBP1    | 2.636308817 | 2.264433508 | 5.969746022 |
| 210101_x_at | SH3GLB1  | 1.904905692 | 2.260139819 | 4.305353207 |
| 201830_s_at | NET1     | 2.653127771 | 2.251802034 | 5.974318511 |
| 211228_s_at | RAD17    | 2.749511786 | 2.249143645 | 6.184046959 |
| 208456_s_at | RRAS2    | 2.453253254 | 2.247490486 | 5.513663348 |
| 201267_s_at | PSMC3    | 2.395229    | 2.24484728  | 5.376923306 |
| 209369_at   | ANXA3    | 1.423490488 | 2.24246546  | 3.192128251 |
| 218330_s_at | NAV2     | 1.32985191  | 2.240104299 | 2.97900698  |
| 202006_at   | PTPN12   | 1.913594731 | 2.238220303 | 4.283046579 |
| 209421_at   | MSH2     | 2.149570637 | 2.234673498 | 4.803588533 |
| 218163_at   | MCTS1    | 2.85345367  | 2.234370456 | 6.375672576 |
| 208925_at   | CLDND1   | 2.035012159 | 2.234110427 | 4.546441884 |
| 218178_s_at | CHMP1B   | 1.988422156 | 2.232177109 | 4.438510419 |
| 214708_at   | SNTB1    | 1.316720166 | 2.231346905 | 2.938059468 |
| 214119_s_at | FKBP1A   | 1.904431059 | 2.22622155  | 4.239685465 |
| 201104_x_at | NBPF14   | 1.475612179 | 2.224380353 | 3.282322739 |
| 220773_s_at | GPHN     | 2.539139173 | 2.224025884 | 5.647111245 |
| 214507_s_at | EXOSC2   | 1.602959543 | 2.223434655 | 3.5640758   |
| 219858_s_at | MFSD6    | 2.903244926 | 2.215279557 | 6.431499132 |
| 211475_s_at | BAG1     | 2.110365099 | 2.208695058 | 4.661152965 |
| 214941_s_at | PRPF40A  | 3.207845413 | 2.207706548 | 7.081981321 |
| 200798_x_at | MCL1     | 2.237353794 | 2.207329296 | 4.938576575 |
| 202058_s_at | KPNA1    | 2.798118146 | 2.198884998 | 6.152740015 |
| 216593_s_at | PIGC     | 2.428179807 | 2.197372246 | 5.335614917 |

|                             |              |             |             |             |
|-----------------------------|--------------|-------------|-------------|-------------|
| AFFX-HUMISGF3A/M97935_MB_at | STAT1        | 2.892576241 | 2.196890048 | 6.354671956 |
| 200778_s_at                 | 40788        | 1.971283174 | 2.192493043 | 4.322024645 |
| 203967_at                   | CDC6         | 1.307820129 | 2.188172462 | 2.861735992 |
| 210732_s_at                 | LGALS8       | 1.391310604 | 2.183278128 | 3.037618011 |
| 201554_x_at                 | GYG1         | 2.630225127 | 2.181510534 | 5.73786382  |
| 206582_s_at                 | GPR56        | 1.469621204 | 2.179939138 | 3.203684781 |
| 218129_s_at                 | NFYB         | 2.811357949 | 2.178876167 | 6.125600834 |
| 205217_at                   | TIMM8A       | 2.476912274 | 2.176918102 | 5.392035168 |
| 220202_s_at                 | RC3H2        | 2.133830723 | 2.175812717 | 4.642816023 |
| 201571_s_at                 | DCTD         | 1.996157266 | 2.172914782 | 4.337479632 |
| 211150_s_at                 | DLAT         | 2.022627643 | 2.172184899 | 4.393521222 |
| 211022_s_at                 | ATRX         | 1.318648809 | 2.172095787 | 2.864231522 |
| 203553_s_at                 | MAP4K5       | 1.526045183 | 2.154734021 | 3.288221472 |
| 205017_s_at                 | MBNL2        | 1.61188039  | 2.149080201 | 3.464060233 |
| 208867_s_at                 | CSNK1A1      | 1.935444529 | 2.148556956 | 4.158412806 |
| 217919_s_at                 | MRPL42       | 2.037159833 | 2.14664116  | 4.373051147 |
| 202730_s_at                 | PDCD4        | 2.489216452 | 2.146028173 | 5.341928634 |
| 217188_s_at                 | C14orf1      | 2.428794854 | 2.143286305 | 5.205602749 |
| 214359_s_at                 | HSP90AB1     | 2.712641664 | 2.137076432 | 5.797122569 |
| 212142_at                   | MCM4         | 1.540840316 | 2.12398673  | 3.272724384 |
| 211997_x_at                 | H3F3B        | 2.258189088 | 2.121174635 | 4.790013416 |
| 205770_at                   | GSR          | 1.644127786 | 2.112157635 | 3.472657056 |
| 210625_s_at                 | AKAP1        | 1.75255728  | 2.109263346 | 3.696604833 |
| 203960_s_at                 | HSPB11       | 1.517892899 | 2.107212966 | 3.198523596 |
| 208055_s_at                 | HERC4        | 1.589675525 | 2.098849748 | 3.336490074 |
| 202889_x_at                 | MAP7         | 1.576300696 | 2.094174265 | 3.301048351 |
| 213419_at                   | APBB2        | 2.109656903 | 2.087470616 | 4.403846794 |
| 209055_s_at                 | CDC5L        | 1.690338292 | 2.084988337 | 3.524335624 |
| 217140_s_at                 | LOC100133724 | 2.663485215 | 2.078188471 | 5.535224265 |
| 200052_s_at                 | ILF2         | 2.4460391   | 2.077588414 | 5.081862495 |
| 200987_x_at                 | PSME3        | 2.787474647 | 2.074285159 | 5.782017292 |
| 205763_s_at                 | DDX18        | 2.032716564 | 2.070427479 | 4.208592231 |
| 215023_s_at                 | PEX1         | 2.151651558 | 2.069948931 | 4.453808841 |
| 202113_s_at                 | SNX2         | 1.944858925 | 2.060779535 | 4.007925472 |
| 200806_s_at                 | HSPD1        | 2.363975463 | 2.057684024 | 4.864314542 |
| 206173_x_at                 | GABPB1       | 2.130947054 | 2.051421731 | 4.371471095 |
| 202352_s_at                 | PSMD12       | 2.789160813 | 2.048526889 | 5.713670923 |
| 213133_s_at                 | GCSH         | 1.748867744 | 2.047748977 | 3.581242135 |
| 209463_s_at                 | TAF12        | 1.407978843 | 2.041399831 | 2.874247772 |
| 201821_s_at                 | TIMM17A      | 3.035295076 | 2.040641309 | 6.193948517 |
| 219467_at                   | GIN1         | 2.899990729 | 2.034518096 | 5.900083618 |
| 216274_s_at                 | SEC11A       | 3.006138069 | 2.031184127 | 6.106019929 |
| 202272_s_at                 | FBXO28       | 1.719394583 | 2.030173143 | 3.490668704 |
| 201444_s_at                 | ATP6AP2      | 2.241478385 | 2.028659675 | 4.547196813 |
| 217370_x_at                 | FUS          | 3.083194636 | 2.020157598 | 6.22853907  |
| 217185_s_at                 | ZNF259P      | 2.12213094  | 2.01870359  | 4.283953347 |
| 209440_at                   | PRPS1        | 1.96119624  | 2.017207404 | 3.956139576 |
| 202717_s_at                 | CDC16        | 1.48865743  | 2.006778883 | 2.987406295 |
| 217755_at                   | HN1          | 2.17393426  | 2.004977961 | 4.35869028  |
| 220240_s_at                 | TMCO3        | 1.493120375 | 1.998251536 | 2.983630084 |
| 202374_s_at                 | RAB3GAP2     | 1.522123628 | 1.995232598 | 3.03699068  |
| 218667_at                   | PJA1         | 1.901520148 | 1.988544742 | 3.781257892 |
| 214487_s_at                 | RAP2B        | 1.798808852 | 1.98680507  | 3.573882547 |
| 214482_at                   | ZBTB25       | 1.444479554 | 1.986280144 | 2.869141056 |
| 200892_s_at                 | None         | 2.592728219 | 1.984339563 | 5.144853181 |
| 214578_s_at                 | ROCK1        | 1.876752856 | 1.983334629 | 3.722228929 |
| 202805_s_at                 | ABCC1        | 2.681482504 | 1.983204996 | 5.3179295   |
| 216971_s_at                 | PLEC1        | 1.64471623  | 1.982496889 | 3.26064481  |
| 213983_s_at                 | PDS5A        | 1.490802453 | 1.981316566 | 2.953751596 |
| 214512_s_at                 | SUB1         | 3.675105323 | 1.979777191 | 7.275889693 |

|             |              |             |             |             |
|-------------|--------------|-------------|-------------|-------------|
| 203158_s_at | GLS          | 1.491351667 | 1.97944427  | 2.95204751  |
| 217173_s_at | LDLR         | 1.85074533  | 1.978787865 | 3.662232399 |
| 201532_at   | PSMA3        | 2.362792085 | 1.977378475 | 4.672134211 |
| 202654_x_at | 40609        | 1.604587942 | 1.977157402 | 3.172522926 |
| 204119_s_at | ADK          | 2.282387494 | 1.976686776 | 4.511565176 |
| 201435_s_at | EIF4E        | 3.083953978 | 1.973211749 | 6.085294224 |
| 203746_s_at | HCCS         | 1.939134041 | 1.973194975 | 3.826289544 |
| 221423_s_at | YIPF5        | 1.668316103 | 1.973132717 | 3.291809086 |
| 213937_s_at | FTSJ1        | 1.941970083 | 1.969166451 | 3.824062336 |
| 204460_s_at | RAD1         | 2.162361229 | 1.967908359 | 4.255328739 |
| 219033_at   | PARP8        | 1.398324699 | 1.967407198 | 2.751074079 |
| 208669_s_at | EID1         | 1.555665526 | 1.961097723 | 3.050812121 |
| 203972_s_at | PEX3         | 2.054179435 | 1.959930733 | 4.026049406 |
| 204313_s_at | CREB1        | 3.069832052 | 1.958661596 | 6.012762146 |
| 208351_s_at | MAPK1        | 1.486244554 | 1.95211245  | 2.901316497 |
| 204369_at   | PIK3CA       | 1.539333248 | 1.950898837 | 3.003083444 |
| 201383_s_at | LOC100133166 | 1.565841467 | 1.9502577   | 3.053794379 |
| 212877_at   | KLC1         | 1.941474125 | 1.946699176 | 3.779466079 |
| 221691_x_at | NPM1         | 2.806407297 | 1.944773085 | 5.457825375 |
| 202899_s_at | SFRS3        | 2.98782329  | 1.942129916 | 5.802740996 |
| 202431_s_at | MYC          | 1.366134701 | 1.940207401 | 2.650584657 |
| 212579_at   | SMCHD1       | 1.416934893 | 1.938944256 | 2.747357772 |
| 210754_s_at | LYN          | 1.5169722   | 1.938734801 | 2.941006796 |
| 217881_s_at | CDC27        | 1.967633373 | 1.936408967 | 3.810142908 |
| 201898_s_at | UBE2A        | 1.825859897 | 1.934083447 | 3.531365403 |
| 209591_s_at | BMP7         | 1.563981451 | 1.930992555 | 3.020036538 |
| 213875_x_at | C6orf62      | 1.741993209 | 1.929819334 | 3.361732175 |
| 218013_x_at | DCTN4        | 3.280616912 | 1.928714868 | 6.327374613 |
| 210104_at   | MED6         | 1.422596942 | 1.927988377 | 2.74275037  |
| 203771_s_at | BLVRA        | 1.960959033 | 1.922486407 | 3.769917085 |
| 205450_at   | PHKA1        | 1.563066311 | 1.921348999 | 3.003195891 |
| 204605_at   | CGRRF1       | 1.691254268 | 1.9204846   | 3.248027776 |
| 205895_s_at | NOLC1        | 1.888061042 | 1.916137517 | 3.617784597 |
| 216202_s_at | SPTLC2       | 1.560268428 | 1.914102512 | 2.986513717 |
| 210594_x_at | MPZL1        | 1.576494807 | 1.908892885 | 3.00935972  |
| 200946_x_at | GLUD1        | 2.275723163 | 1.908760039 | 4.343809434 |
| 222262_s_at | ETNK1        | 2.106751762 | 1.902967673 | 4.009080498 |
| 217208_s_at | DLG1         | 1.780715107 | 1.900818364 | 3.384815977 |
| 218393_s_at | SMU1         | 2.021606976 | 1.899751232 | 3.840550343 |
| 203962_s_at | NEBL         | 1.944918412 | 1.897796839 | 3.691060014 |
| 201151_s_at | MBNL1        | 2.000818624 | 1.895876871 | 3.793305752 |
| 210667_s_at | C21orf33     | 2.21899236  | 1.890806224 | 4.195684564 |
| 218582_at   | 40607        | 2.41258312  | 1.890753377 | 4.561599682 |
| 213358_at   | KIAA0802     | 3.034781681 | 1.886424203 | 5.724885613 |
| 201014_s_at | PAICS        | 2.27434176  | 1.88621989  | 4.289908665 |
| 215936_s_at | KIAA1033     | 2.352278365 | 1.884060525 | 4.43183481  |
| 201946_s_at | CCT2         | 2.17555817  | 1.883271354 | 4.097166381 |
| 221620_s_at | APOO         | 2.248586692 | 1.88119835  | 4.230037576 |
| 200723_s_at | CAPRIN1      | 2.727328175 | 1.880202727 | 5.127929874 |
| 222150_s_at | PION         | 1.353933589 | 1.880086424 | 2.54551216  |
| 219204_s_at | SRR          | 1.885057105 | 1.87810516  | 3.540335476 |
| 201043_s_at | ANP32A       | 1.864025489 | 1.875670879 | 3.496298328 |
| 209067_s_at | HNRPDL       | 3.644546702 | 1.875353331 | 6.834812798 |
| 205219_s_at | GALK2        | 1.306217167 | 1.871096185 | 2.444057959 |
| 212181_s_at | NUDT4        | 1.808648769 | 1.869863933 | 3.381927101 |
| 216511_s_at | TCF7L2       | 2.759986102 | 1.869342602 | 5.159359601 |
| 215933_s_at | HHEX         | 2.575215254 | 1.868137934 | 4.810857305 |
| 204032_at   | BCAR3        | 1.63594675  | 1.867439924 | 3.055032273 |
| 205704_s_at | ATP6V0A2     | 2.588256854 | 1.865541162 | 4.828499698 |
| 64883_at    | MOSPD2       | 1.439578532 | 1.865051641 | 2.684888305 |
| 204234_s_at | ZNF195       | 1.303364359 | 1.86075718  | 2.425244589 |

|                         |              |             |             |             |
|-------------------------|--------------|-------------|-------------|-------------|
| 216604_s_at             | SLC7A8       | 1.692540175 | 1.859888212 | 3.14793552  |
| 207614_s_at             | CUL1         | 2.424746803 | 1.859698872 | 4.509298893 |
| 218219_s_at             | LANCL2       | 1.460007041 | 1.85700175  | 2.71123563  |
| 200737_at               | PGK1         | 2.146220557 | 1.855637672 | 3.982607718 |
| 200624_s_at             | MATR3        | 2.559983934 | 1.854014902 | 4.746248361 |
| 216899_s_at             | SKAP2        | 1.682771266 | 1.853659606 | 3.119285122 |
| 201784_s_at             | C11orf58     | 2.504388646 | 1.845666167 | 4.622265392 |
| 205961_s_at             | PSIP1        | 1.676689692 | 1.843535948 | 3.09103772  |
| 201529_s_at             | RPA1         | 2.280069821 | 1.841240587 | 4.198157095 |
| 203560_at               | GGH          | 1.694347972 | 1.838605348 | 3.115237243 |
| 207469_s_at             | PIR          | 2.981131185 | 1.836347452 | 5.474392657 |
| 203347_s_at             | MTF2         | 1.63123664  | 1.82945714  | 2.984277519 |
| 207654_x_at             | DR1          | 1.810304468 | 1.828743668 | 3.310582834 |
| 204420_at               | FOSL1        | 1.720739795 | 1.82599387  | 3.142060317 |
| 218349_s_at             | ZWILCH       | 1.615259877 | 1.820016239 | 2.939799205 |
| 201580_s_at             | None         | 1.351483264 | 1.812336273 | 2.449342142 |
| AFFX-HSAC07/X00351_M_at | ACTB         | 2.432239795 | 1.812181095 | 4.407658976 |
| 219080_s_at             | CTPS2        | 2.10229726  | 1.81198194  | 3.809324668 |
| 207645_s_at             | CHD1L        | 1.602366975 | 1.810333947 | 2.90081933  |
| 202164_s_at             | CNOT8        | 2.427157406 | 1.807270619 | 4.386530269 |
| 214649_s_at             | MTMR2        | 1.71969127  | 1.804421571 | 3.103048024 |
| 200898_s_at             | MGEA5        | 1.818897612 | 1.803693479 | 3.280733762 |
| 210007_s_at             | GPD2         | 2.588257918 | 1.803152448 | 4.667023602 |
| 211762_s_at             | KPNA2        | 1.797907148 | 1.800025526 | 3.23627876  |
| 203622_s_at             | PNO1         | 1.655470396 | 1.799472422 | 2.978973322 |
| 200605_s_at             | PRKAR1A      | 1.685680308 | 1.798830658 | 3.032253417 |
| 204107_at               | NFYA         | 1.969136115 | 1.796005298 | 3.536578895 |
| 201872_s_at             | ABCE1        | 1.656617239 | 1.795248254 | 2.974039206 |
| 213376_at               | ZBTB1        | 1.458626378 | 1.794311647 | 2.617230299 |
| 219295_s_at             | PCOLCE2      | 1.302307275 | 1.794081355 | 2.336445202 |
| 203105_s_at             | DNM1L        | 2.68008164  | 1.794030748 | 4.808148871 |
| 209287_s_at             | CDC42EP3     | 1.745257512 | 1.793677798 | 3.13042965  |
| 203100_s_at             | CDYL         | 2.355642271 | 1.790950933 | 4.218839723 |
| 40148_at                | APBB2        | 1.970137706 | 1.790249794 | 3.527038622 |
| 211749_s_at             | VAMP3        | 2.798762451 | 1.786316317 | 4.999475034 |
| 213346_at               | C13orf27     | 2.057600675 | 1.784886046 | 3.672582733 |
| 218398_at               | MRPS30       | 1.985354839 | 1.784747773 | 3.543357629 |
| 210759_s_at             | PSMA1        | 2.328609093 | 1.784518733 | 4.155446549 |
| 210983_s_at             | MCM7         | 1.586515111 | 1.780472703 | 2.824746847 |
| 218989_x_at             | SLC30A5      | 2.039275649 | 1.769462854 | 3.60842251  |
| 201926_s_at             | CD55         | 1.394870382 | 1.768799421 | 2.467245924 |
| 208622_s_at             | LOC100129652 | 1.512571487 | 1.767094206 | 2.672856311 |
| 203199_s_at             | MTRR         | 1.331913811 | 1.766290216 | 2.352546333 |
| 202783_at               | NNT          | 1.844184219 | 1.766265624 | 3.257319189 |
| 212729_at               | DLG3         | 1.694875125 | 1.766102379 | 2.993322992 |
| 221381_s_at             | MORF4        | 1.858585203 | 1.764899891 | 3.280216823 |
| 210826_x_at             | RAD17        | 1.949768554 | 1.761883624 | 3.435265286 |
| 201747_s_at             | SAFB         | 1.855520619 | 1.760064493 | 3.265835956 |
| 204589_at               | NUAK1        | 1.310066452 | 1.759226217 | 2.304703249 |
| 204764_at               | FNTB         | 1.98200753  | 1.757864435 | 3.484100548 |
| 200753_x_at             | SFRS2        | 1.919199942 | 1.753375851 | 3.365078831 |
| 208739_x_at             | SUMO2        | 1.784042518 | 1.751779409 | 3.125248949 |
| 65591_at                | WDR48        | 1.560475026 | 1.747821798 | 2.727432266 |
| 201324_at               | EMP1         | 1.641375639 | 1.747817981 | 2.868825856 |
| 218342_s_at             | ERMP1        | 1.707647959 | 1.746673653 | 2.9827037   |
| 204453_at               | ZNF84        | 1.985952595 | 1.741047923 | 3.457638641 |
| 219081_at               | ANKHD1       | 1.400083241 | 1.740949353 | 2.437474012 |
| 212590_at               | RRAS2        | 2.010220788 | 1.738487098 | 3.494742904 |
| 212036_s_at             | PNN          | 2.078351828 | 1.737945783 | 3.612062796 |
| 212878_s_at             | KLC1         | 1.310411444 | 1.733831762 | 2.272032983 |
| 212065_s_at             | USP34        | 2.267225791 | 1.733375265 | 3.929953105 |

|             |              |             |             |             |
|-------------|--------------|-------------|-------------|-------------|
| 205173_x_at | CD58         | 1.805540595 | 1.731083834 | 3.125542136 |
| 221987_s_at | TSR1         | 1.440399056 | 1.725568694 | 2.485507517 |
| 201727_s_at | ELAVL1       | 1.544487021 | 1.722014826 | 2.65962955  |
| 204493_at   | BID          | 1.843927759 | 1.717895759 | 3.167675677 |
| 215160_x_at | LOC642236    | 1.564037428 | 1.717722976 | 2.686583026 |
| 207622_s_at | ABCF2        | 2.925065102 | 1.717551756 | 5.023950704 |
| 218499_at   | RP6-213H19.1 | 1.958909223 | 1.716516549 | 3.362500099 |
| 214060_at   | SSBP1        | 1.653486358 | 1.713492555 | 2.833236564 |
| 201376_s_at | HNRNPF       | 2.411905286 | 1.713218717 | 4.132121281 |
| 210278_s_at | AP4S1        | 1.347073227 | 1.712497303 | 2.306859268 |
| 209157_at   | DNAJA2       | 1.593166845 | 1.710710575 | 2.725447369 |
| 216532_x_at | LOC728344    | 1.368471933 | 1.708113442 | 2.337505304 |
| 217050_at   | EPAG         | 1.665548644 | 1.707483093 | 2.84389615  |
| 221641_s_at | ACOT9        | 2.258418803 | 1.702191313 | 3.844260866 |
| 209027_s_at | ABI1         | 1.707674524 | 1.701986231 | 2.906438527 |
| 200927_s_at | RAB14        | 1.71796126  | 1.701474297 | 2.923066927 |
| 203640_at   | MBNL2        | 1.638458514 | 1.700599069 | 2.786361024 |
| 218049_s_at | MRPL13       | 2.959996563 | 1.700415223 | 5.033223215 |
| 201457_x_at | BUB3         | 1.943014648 | 1.700242306 | 3.303595706 |
| 211115_x_at | SIP1         | 1.952542808 | 1.699466632 | 3.31828135  |
| 221517_s_at | MED17        | 1.862629699 | 1.697038111 | 3.160953587 |
| 208899_x_at | ATP6V1D      | 1.473385636 | 1.69396999  | 2.495871052 |
| 216100_s_at | TOR1AIP1     | 1.556388622 | 1.690809973 | 2.631557403 |
| 209799_at   | PRKAA1       | 2.416051028 | 1.689889465 | 4.08285918  |
| 214513_s_at | CREB1        | 2.314019119 | 1.688645747 | 3.907558545 |
| 221449_s_at | ITFG1        | 2.57384445  | 1.684313697 | 4.335161461 |
| 217457_s_at | RAP1GDS1     | 2.309262888 | 1.68409782  | 3.889024596 |
| 208708_x_at | EIF5         | 2.559228954 | 1.682656872 | 4.306304186 |
| 208884_s_at | UBR5         | 1.887298014 | 1.682286161 | 3.17497533  |
| 213288_at   | MBOAT2       | 1.804601421 | 1.680766545 | 3.033113696 |
| 211665_s_at | SOS2         | 1.327393521 | 1.680536463 | 2.230733214 |
| 218073_s_at | TMEM48       | 2.159127914 | 1.675769225 | 3.618200111 |
| 201452_at   | RHEB         | 1.541718694 | 1.669082329 | 2.573255427 |
| 202591_s_at | SSBP1        | 2.709643371 | 1.668384632 | 4.520727359 |
| 206468_s_at | None         | 2.408341445 | 1.667447284 | 4.015782401 |
| 218365_s_at | DARS2        | 2.089395223 | 1.665973496 | 3.480877065 |
| 217738_at   | NAMPT        | 1.64757468  | 1.665687382 | 2.744344355 |
| 208992_s_at | STAT3        | 1.817268372 | 1.664697531 | 3.025202172 |
| 208696_at   | CCT5         | 3.347314426 | 1.662153441 | 5.56375019  |
| 200803_s_at | TMBIM6       | 1.919072378 | 1.658398812 | 3.182587351 |
| 203843_at   | RPS6KA3      | 1.789593816 | 1.656419832 | 2.964318688 |
| 214931_s_at | SRPK2        | 1.331221274 | 1.656109732 | 2.204648508 |
| 215992_s_at | RAPGEF2      | 1.467233268 | 1.655847593 | 2.429514675 |
| 219758_at   | TTC26        | 1.310808274 | 1.652860542 | 2.166583273 |
| 221513_s_at | UTP14A       | 1.324396204 | 1.651753263 | 2.187575751 |
| 200604_s_at | PRKAR1A      | 1.37394072  | 1.640602936 | 2.254091179 |
| 210216_x_at | RAD1         | 2.050648978 | 1.638924251 | 3.360858341 |
| 208453_s_at | XPNPEP1      | 3.614155507 | 1.636531415 | 5.914679028 |
| 221143_at   | RPA4         | 2.875057911 | 1.6352154   | 4.701338971 |
| 200950_at   | ARPC1A       | 1.369723294 | 1.634802419 | 2.239226954 |
| 211622_s_at | ARF3         | 2.395617654 | 1.634236478 | 3.915005758 |
| 219079_at   | CYB5R4       | 1.48636266  | 1.630272381 | 2.423175993 |
| 200638_s_at | YWHAZ        | 2.695488798 | 1.623538413 | 4.376229605 |
| 218801_at   | UGCGL2       | 1.540674517 | 1.618745112 | 2.493959343 |
| 206158_s_at | CNBP         | 2.140468464 | 1.61757459  | 3.462367397 |
| 219974_x_at | ECHDC1       | 2.299105846 | 1.614366752 | 3.711600039 |
| 200902_at   | 40801        | 2.823155055 | 1.613141202 | 4.554147738 |
| 208816_x_at | ANXA2P2      | 1.661803035 | 1.612073614 | 2.678948825 |
| 205761_s_at | DUS4L        | 1.616077615 | 1.60824473  | 2.599048308 |
| 222382_x_at | NUP205       | 1.680914053 | 1.605584742 | 2.698849956 |
| 213047_x_at | SET          | 1.572936169 | 1.604167248 | 2.523252685 |



|             |          |             |             |             |
|-------------|----------|-------------|-------------|-------------|
| 208627_s_at | YBX1     | 2.158234077 | 1.602719423 | 3.459043675 |
| 201929_s_at | PKP4     | 1.78992883  | 1.598841107 | 2.861811792 |
| 215918_s_at | SPTBN1   | 1.376150783 | 1.597505595 | 2.198408576 |
| 219715_s_at | TDP1     | 1.535615916 | 1.596931355 | 2.452273206 |
| 221514_at   | UTP14A   | 1.67059454  | 1.596837751 | 2.667668427 |
| 210009_s_at | GOSR2    | 3.336940126 | 1.596105018 | 5.326106879 |
| 212481_s_at | TPM4     | 2.062458235 | 1.593715449 | 3.286971553 |
| 208846_s_at | VDAC3    | 2.125878357 | 1.590527253 | 3.381267462 |
| 202429_s_at | PPP3CA   | 1.359415454 | 1.58984136  | 2.161254914 |
| 201239_s_at | SPCS2    | 2.459200834 | 1.582905963 | 3.892683665 |
| 200973_s_at | TSPAN3   | 2.393244067 | 1.582115752 | 3.786389136 |
| 210283_x_at | PAIP1    | 3.178238597 | 1.581918581 | 5.027714691 |
| 215424_s_at | SNW1     | 3.479622213 | 1.579700452 | 5.496760782 |
| 200828_s_at | ZNF207   | 3.257080306 | 1.579314584 | 5.143954429 |
| 217786_at   | PRMT5    | 3.127631044 | 1.579136751 | 4.938957126 |
| 202697_at   | NUDT21   | 1.610587638 | 1.576125298 | 2.538487921 |
| 221531_at   | WDR61    | 3.055148492 | 1.574491583 | 4.810305586 |
| 201308_s_at | 40797    | 2.508473181 | 1.571221227 | 3.941366308 |
| 219217_at   | NARS2    | 1.387766483 | 1.569785801 | 2.178496121 |
| 211559_s_at | CCNG2    | 1.367121034 | 1.569054822 | 2.14508785  |
| 201298_s_at | MOBK1B   | 2.02350442  | 1.567113018 | 3.171060119 |
| 209188_x_at | DR1      | 1.875389338 | 1.566993949 | 2.938723744 |
| 202162_s_at | CNOT8    | 1.627769586 | 1.565148155 | 2.547700565 |
| 215984_s_at | ARFRP1   | 2.205054861 | 1.564043731 | 3.448802232 |
| 211793_s_at | ABI2     | 1.306946066 | 1.562054006 | 2.041520338 |
| 206302_s_at | NUDT4    | 1.324300016 | 1.559048495 | 2.064647946 |
| 220985_s_at | RNF170   | 1.40955207  | 1.557396848 | 2.195231951 |
| 203518_at   | LYST     | 1.442937462 | 1.556874798 | 2.24647297  |
| 221482_s_at | ARPP-19  | 1.967690852 | 1.556273556 | 3.062265241 |
| 200872_at   | S100A10  | 1.408379321 | 1.553299812 | 2.187635333 |
| 202635_s_at | POLR2K   | 2.336974581 | 1.553117336 | 3.629595736 |
| 205053_at   | PRIM1    | 1.615025966 | 1.551761907 | 2.506135773 |
| 203267_s_at | DRG2     | 1.545495219 | 1.551623447 | 2.398026619 |
| 209331_s_at | MAX      | 2.860928216 | 1.55099038  | 4.437272142 |
| 210596_at   | MAGT1    | 2.153676795 | 1.550727733 | 3.339766334 |
| 218669_at   | RAP2C    | 1.58340239  | 1.550329121 | 2.454794835 |
| 204853_at   | ORC2L    | 2.222351537 | 1.549881396 | 3.444381304 |
| 209015_s_at | DNAJB6   | 2.301551257 | 1.547839543 | 3.562432047 |
| 212871_at   | MAPKAPK5 | 1.911251193 | 1.546166256 | 2.955112101 |
| 215549_x_at | CTAGE4   | 1.984462968 | 1.544431628 | 3.064867372 |
| 212436_at   | TRIM33   | 1.589120801 | 1.543111715 | 2.452190924 |
| 209545_s_at | RIPK2    | 1.447619299 | 1.542484744 | 2.232930685 |
| 211681_s_at | PDLIM5   | 1.4881733   | 1.536467464 | 2.286529855 |
| 208857_s_at | PCMT1    | 1.487851828 | 1.535668553 | 2.284847264 |
| 207974_s_at | SKP1     | 2.268842567 | 1.529735083 | 3.470728073 |
| 203345_s_at | MTF2     | 1.645654837 | 1.528831494 | 2.515928943 |
| 200889_s_at | SSR1     | 1.52518641  | 1.527997316 | 2.330480742 |
| 202579_x_at | HMGN4    | 1.87403219  | 1.52444461  | 2.85685827  |
| 209452_s_at | VTI1B    | 2.033874076 | 1.523081481 | 3.097755939 |
| 208683_at   | CAPN2    | 3.182044967 | 1.521472495 | 4.841393897 |
| 217725_x_at | SERBP1   | 1.648728859 | 1.519827052 | 2.505782722 |
| 203091_at   | FUBP1    | 2.222991778 | 1.516032879 | 3.370128625 |
| 212168_at   | RBM12    | 2.214742007 | 1.515525251 | 3.356497436 |
| 209095_at   | DLD      | 1.449909894 | 1.514447403 | 2.195812273 |
| 201127_s_at | ACLY     | 3.12071727  | 1.514428374 | 4.726102782 |
| 214074_s_at | CTTN     | 1.876908804 | 1.512867612 | 2.83951454  |
| 203790_s_at | HRSP12   | 1.882906753 | 1.511579742 | 2.846163703 |
| 209276_s_at | GLRX     | 1.307837612 | 1.51033512  | 1.975273078 |
| 217821_s_at | WBP11    | 1.92441363  | 1.509565748 | 2.9050289   |
| 212254_s_at | DST      | 1.452259714 | 1.509319145 | 2.191923389 |
| 207275_s_at | ACSL1    | 2.141852341 | 1.508733726 | 3.231484864 |

|                                 |           |             |             |             |
|---------------------------------|-----------|-------------|-------------|-------------|
| 204976_s_at                     | AMMECR1   | 2.146100159 | 1.507674514 | 3.235620514 |
| 209108_at                       | TSPAN6    | 1.316756173 | 1.506118176 | 1.983190406 |
| 209139_s_at                     | PRKRA     | 1.896384386 | 1.506083839 | 2.856113876 |
| 218842_at                       | RPAP3     | 1.633348188 | 1.50290249  | 2.454763059 |
| 204023_at                       | RFC4      | 1.734762441 | 1.498089554 | 2.598829491 |
| 208897_s_at                     | DDX18     | 1.606458241 | 1.495794627 | 2.402931605 |
| 209853_s_at                     | PSME3     | 2.503437843 | 1.494911649 | 3.742418394 |
| 208863_s_at                     | SFRS1     | 1.93974053  | 1.489489996 | 2.889224114 |
| 211804_s_at                     | CDK2      | 2.263003921 | 1.488800228 | 3.369160753 |
| 211337_s_at                     | TUBGCP4   | 1.877768282 | 1.488744335 | 2.795516892 |
| 222035_s_at                     | PAPOLA    | 2.326275607 | 1.482554296 | 3.448829896 |
| 201695_s_at                     | NP        | 1.496300929 | 1.482384217 | 2.218092882 |
| 214107_x_at                     | LOC729034 | 2.579341127 | 1.478763301 | 3.814235    |
| 209063_x_at                     | LOC645139 | 2.873773705 | 1.478613139 | 4.249199559 |
| 221622_s_at                     | TMEM126B  | 2.003278565 | 1.478505738 | 2.961858853 |
| 202925_s_at                     | PLAGL2    | 1.821660891 | 1.478129058 | 2.692649897 |
| 212792_at                       | DPY19L1   | 2.342197176 | 1.477321031 | 3.460177146 |
| 210092_at                       | MAGOH     | 1.651328539 | 1.476593087 | 2.438340305 |
| 203319_s_at                     | ZNF148    | 1.905016776 | 1.475794053 | 2.81141243  |
| 211725_s_at                     | BID       | 1.504902931 | 1.471990547 | 2.215202888 |
| 202941_at                       | NDUFV2    | 2.251626426 | 1.471671771 | 3.31365505  |
| 208761_s_at                     | SUMO1     | 1.81702305  | 1.471602928 | 2.673936441 |
| 202691_at                       | SNRPD1    | 1.469310693 | 1.471420847 | 2.161974385 |
| 200693_at                       | YWHAQ     | 2.614028859 | 1.471130418 | 3.845577368 |
| 209600_s_at                     | ACOX1     | 1.651048891 | 1.468561076 | 2.424666136 |
| 218479_s_at                     | XPO4      | 1.312648993 | 1.463946225 | 1.921647539 |
| 203696_s_at                     | RFC2      | 1.597162562 | 1.463896229 | 2.338080251 |
| 210988_s_at                     | PRUNE     | 1.380714237 | 1.463768804 | 2.021046427 |
| 202179_at                       | BLMH      | 1.607419002 | 1.461627422 | 2.349447691 |
| 209249_s_at                     | GHITM     | 1.792309705 | 1.459574799 | 2.616010078 |
| 209069_s_at                     | H3F3B     | 1.812905644 | 1.45774931  | 2.642761951 |
| 219283_at                       | C1GALT1C1 | 2.402444697 | 1.457710996 | 3.502070052 |
| 203293_s_at                     | LMAN1     | 1.370350102 | 1.457509743 | 1.997298625 |
| 209307_at                       | SWAP70    | 1.609456923 | 1.454280037 | 2.340601072 |
| 203165_s_at                     | SLC33A1   | 1.396760761 | 1.45170147  | 2.02767965  |
| 209386_at                       | TM4SF1    | 1.389564972 | 1.451536674 | 2.017004517 |
| 212568_s_at                     | DLAT      | 1.561320705 | 1.451081273 | 2.265603238 |
| 217383_at                       | PGK1      | 1.812908111 | 1.444474343 | 2.618699253 |
| 202514_at                       | DLG1      | 1.436436562 | 1.444372983 | 2.074750162 |
| 215084_s_at                     | LRRC42    | 1.403113219 | 1.44216131  | 2.023515598 |
| 202736_s_at                     | LSM4      | 2.063104166 | 1.44087161  | 2.972668221 |
| 201520_s_at                     | GRSF1     | 2.768923028 | 1.440203356 | 3.987812239 |
| 216640_s_at                     | PDIA6     | 1.920080901 | 1.439346328 | 2.763661395 |
| 202918_s_at                     | MOBK13    | 1.775574977 | 1.438343564 | 2.553886839 |
| 212896_at                       | SKIV2L2   | 1.856382816 | 1.437559709 | 2.668661141 |
| 204459_at                       | CSTF2     | 1.351823259 | 1.435897225 | 1.941079266 |
| 221547_at                       | PRPF18    | 1.686304963 | 1.434174912 | 2.418456272 |
| 204350_s_at                     | MED7      | 2.20724942  | 1.434119374 | 3.165459157 |
| 204132_s_at                     | FOXO3     | 2.0775093   | 1.433409764 | 2.977922116 |
| 218167_at                       | AMZ2      | 1.56002377  | 1.432832059 | 2.235252071 |
| 221770_at                       | RPE       | 2.038201811 | 1.426881339 | 2.90827213  |
| 212247_at                       | NUP205    | 1.996657583 | 1.425590164 | 2.846415411 |
| 220949_s_at                     | C7orf49   | 1.775462772 | 1.425093304 | 2.530200107 |
| 219420_s_at                     | C1orf163  | 1.536079783 | 1.424378949 | 2.187959707 |
| 212206_s_at                     | H2AFV     | 1.476631435 | 1.423888483 | 2.102558493 |
| 201888_s_at                     | IL13RA1   | 1.644265886 | 1.418737124 | 2.332781055 |
| 203338_at                       | PPP2R5E   | 1.445189106 | 1.418212255 | 2.049584901 |
| 212470_at                       | SPAG9     | 1.900750373 | 1.414221787 | 2.688082588 |
| 212985_at                       | APBB2     | 1.838108524 | 1.410606773 | 2.592848333 |
| AFFX-<br>HUMISGF3A/M97935_MA_at | STAT1     | 2.171575542 | 1.410519986 | 3.063050703 |

|             |           |             |             |             |
|-------------|-----------|-------------|-------------|-------------|
| 216652_s_at | DR1       | 1.645976487 | 1.41007552  | 2.320951151 |
| 212025_s_at | FLII      | 1.863763208 | 1.4094925   | 2.626960265 |
| 210235_s_at | PPFIA1    | 1.826897735 | 1.407654114 | 2.571640113 |
| 213423_x_at | TUSC3     | 2.924887642 | 1.405606753 | 4.111241822 |
| 201914_s_at | SEC63     | 1.475846941 | 1.405588966 | 2.074434176 |
| 213794_s_at | NGDN      | 2.68075732  | 1.403064199 | 3.761274623 |
| 221676_s_at | CORO1C    | 2.416045074 | 1.402820022 | 3.389276403 |
| 217955_at   | BCL2L13   | 2.776322697 | 1.401527999 | 3.891093994 |
| 1053_at     | RFC2      | 2.348767887 | 1.399291357 | 3.286610604 |
| 203142_s_at | AP3B1     | 1.355600018 | 1.39835962  | 1.895616326 |
| 208653_s_at | CD164     | 1.444092754 | 1.397652552 | 2.018339923 |
| 203893_at   | TAF9      | 1.485985978 | 1.397429894 | 2.076561227 |
| 208967_s_at | AK2       | 2.355755406 | 1.39434318  | 3.284731485 |
| 209590_at   | BMP7      | 2.283284987 | 1.392422679 | 3.179297798 |
| 213182_x_at | CDKN1C    | 1.461838265 | 1.39239315  | 2.035453588 |
| 217960_s_at | TOMM22    | 1.36926067  | 1.390552073 | 1.904028263 |
| 220121_at   | LINS1     | 1.388764348 | 1.389330413 | 1.929452545 |
| 208642_s_at | XRCC5     | 2.734559153 | 1.388750112 | 3.797619331 |
| 212460_at   | C14orf147 | 2.130658664 | 1.388322767 | 2.958041932 |
| 218462_at   | BXDC5     | 1.445013025 | 1.385195352 | 2.001625327 |
| 203492_x_at | CEP57     | 1.481318788 | 1.38433419  | 2.050640244 |
| 201144_s_at | EIF2S1    | 2.296906988 | 1.382990409 | 3.176600336 |
| 201021_s_at | DSTN      | 1.375569584 | 1.377552065 | 1.894918721 |
| 210765_at   | CSE1L     | 1.888082513 | 1.377005105 | 2.59989926  |
| 209860_s_at | ANXA7     | 1.981716562 | 1.374606748 | 2.724080959 |
| 217743_s_at | TMEM30A   | 1.691655863 | 1.373200169 | 2.322982118 |
| 202232_s_at | EIF3M     | 2.265070641 | 1.372754789 | 3.109386571 |
| 217465_at   | NCKAP1    | 1.605273277 | 1.372692034 | 2.203545839 |
| 212225_at   | EIF1      | 1.459062087 | 1.366215843 | 1.993393739 |
| 202078_at   | COPS3     | 1.429676324 | 1.361443734 | 1.946423872 |
| 208643_s_at | XRCC5     | 1.673976464 | 1.359822975 | 2.276311656 |
| 214449_s_at | RHOQ      | 2.806843503 | 1.357447718 | 3.810143309 |
| 218172_s_at | DERL1     | 1.649641783 | 1.353818249 | 2.233315149 |
| 208980_s_at | UBC       | 2.907060914 | 1.353353595 | 3.934281339 |
| 219200_at   | FASTKD3   | 2.006734371 | 1.351116324 | 2.711331566 |
| 201920_at   | SLC20A1   | 2.039190814 | 1.349329328 | 2.751539971 |
| 212342_at   | YIPF6     | 1.685404068 | 1.346786945 | 2.269880196 |
| 221703_at   | BRIP1     | 2.229833737 | 1.345712886 | 3.000715993 |
| 208800_at   | SRP72     | 1.931580099 | 1.344988072 | 2.597952193 |
| 207845_s_at | ANAPC10   | 2.623981484 | 1.344668061 | 3.528384094 |
| 209445_x_at | C7orf44   | 1.796042127 | 1.344466157 | 2.414717856 |
| 202467_s_at | COPS2     | 1.835151639 | 1.339889895 | 2.458901136 |
| 205324_s_at | FTSJ1     | 1.96710661  | 1.339358242 | 2.63466045  |
| 201619_at   | PRDX3     | 3.144912921 | 1.337394361 | 4.205988808 |
| 209628_at   | NXT2      | 1.521182161 | 1.336594414 | 2.033203579 |
| 202566_s_at | SVIL      | 1.398041356 | 1.335993399 | 1.867774023 |
| 211963_s_at | ARPC5     | 2.620643407 | 1.333803471 | 3.495423271 |
| 219356_s_at | CHMP5     | 2.632500762 | 1.333731772 | 3.511049906 |
| 204113_at   | CUGBP1    | 1.934481976 | 1.33209682  | 2.576917288 |
| 213031_s_at | WDR73     | 1.88977161  | 1.331103312 | 2.515481249 |
| 218118_s_at | TIMM23    | 1.491773804 | 1.331068384 | 1.985652946 |
| 204752_x_at | PARP2     | 1.342312529 | 1.329523539 | 1.784636104 |
| 204361_s_at | SKAP2     | 1.817740902 | 1.328286769 | 2.414481189 |
| 200996_at   | ACTR3     | 1.719495333 | 1.327397642 | 2.28245405  |
| 215090_x_at | LOC440434 | 2.631244092 | 1.326699384 | 3.490869916 |
| 203582_s_at | RAB4A     | 1.920379278 | 1.324613453 | 2.543760227 |
| 214141_x_at | SFRS7     | 2.275223525 | 1.322769474 | 3.009596226 |
| 211139_s_at | NAB1      | 1.307016007 | 1.321133543 | 1.726742688 |
| 218238_at   | GTPBP4    | 1.523635665 | 1.320792135 | 2.012406003 |
| 217744_s_at | PERP      | 1.690111912 | 1.320226921 | 2.231331245 |
| 209804_at   | DCLRE1A   | 1.553579859 | 1.314947717 | 2.042876288 |

|             |         |             |             |             |
|-------------|---------|-------------|-------------|-------------|
| 209520_s_at | NCBP1   | 1.877143552 | 1.313859518 | 2.466302923 |
| 217848_s_at | PPA1    | 2.626231962 | 1.313356722 | 3.449179401 |
| 203087_s_at | KIF2A   | 2.986602338 | 1.312625734 | 3.920291086 |
| 205004_at   | NKRF    | 1.897369459 | 1.312411018 | 2.490128583 |
| 200881_s_at | DNAJA1  | 1.453689005 | 1.309878482 | 1.904155947 |
| 220369_at   | SMEK1   | 1.551966847 | 1.309793799 | 2.032756551 |
| 204725_s_at | NCK1    | 1.950765079 | 1.307663852 | 2.550944978 |
| 202131_s_at | RIOK3   | 1.610653144 | 1.306374261 | 2.104115812 |
| 209861_s_at | METAP2  | 2.847167296 | 1.304177624 | 3.713211878 |
| 215220_s_at | TPR     | 2.347029142 | 1.303847313 | 3.06016764  |
| 219449_s_at | TMEM70  | 2.56580495  | 1.303528797 | 3.34460064  |
| 218568_at   | AGK     | 1.516241312 | 1.302931351 | 1.975558341 |
| 201020_at   | YWHAH   | 1.331326594 | 1.300163262 | 1.730941927 |
| 200739_s_at | SUMO3   | 1.885745604 | 1.300150473 | 2.45175304  |
| 209902_at   | ATR     | 1.970785581 | 1.299224269 | 2.560492455 |
| 206238_s_at | YAF2    | 2.664532984 | 1.298898255 | 3.460957242 |
| 209796_s_at | CNPY2   | 1.631111868 | 1.29691293  | 2.115410072 |
| 200755_s_at | CALU    | 1.311506775 | 1.295111311 | 1.698547259 |
| 201485_s_at | RCN2    | 1.657130457 | 1.294553451 | 2.145243952 |
| 201899_s_at | UBE2A   | 2.063824956 | 1.293427853 | 2.669408682 |
| 207551_s_at | MSL3    | 2.04075172  | 1.293344301 | 2.639394608 |
| 204336_s_at | RGS19   | 1.337611315 | 1.29266689  | 1.729085858 |
| 219399_at   | LIN7C   | 1.67104856  | 1.290297163 | 2.156149216 |
| 204643_s_at | ENOX2   | 1.54509483  | 1.28671248  | 1.9880928   |
| 219158_s_at | NARG1   | 1.579622116 | 1.285910184 | 2.031252166 |
| 202753_at   | PSMD6   | 1.910806528 | 1.28309699  | 2.451750106 |
| 203594_at   | RTCD1   | 1.349606005 | 1.283035193 | 1.731592    |
| 205282_at   | LRP8    | 1.313835549 | 1.280945315 | 1.682951492 |
| 217739_s_at | NAMPT   | 1.338718745 | 1.277438693 | 1.710131124 |
| 209330_s_at | HNRNPD  | 1.7694121   | 1.276612209 | 2.25885309  |
| 213823_at   | HOXA11  | 2.002986235 | 1.275943108 | 2.555696481 |
| 202061_s_at | SEL1L   | 1.704458684 | 1.275711178 | 2.174396995 |
| 201518_at   | CBX1    | 1.528466201 | 1.274766176 | 1.948437014 |
| 201222_s_at | RAD23B  | 1.352475798 | 1.272249432 | 1.720686566 |
| 219099_at   | C12orf5 | 2.255702781 | 1.271286679 | 2.867644898 |
| 201653_at   | CNIH    | 1.747162242 | 1.270401012 | 2.219596681 |
| 201317_s_at | PSMA2   | 2.188657485 | 1.269682847 | 2.778900865 |
| 200883_at   | UQCRC2  | 1.813732854 | 1.269213877 | 2.302014908 |
| 201196_s_at | AMD1    | 1.361616865 | 1.267894099 | 1.726385988 |
| 206854_s_at | MAP3K7  | 1.408291117 | 1.264505353 | 1.780791657 |
| 201121_s_at | PGRMC1  | 2.629952894 | 1.263293359 | 3.322402024 |
| 221477_s_at | SOD2    | 1.617288663 | 1.262090148 | 2.041164089 |
| 202100_at   | RALB    | 1.440404461 | 1.261859151 | 1.817587551 |
| 212678_at   | NF1     | 2.445644792 | 1.26087184  | 3.083644648 |
| 212378_at   | GART    | 1.872755408 | 1.260810892 | 2.361190417 |
| 202290_at   | PDAP1   | 1.945050804 | 1.260380261 | 2.45150364  |
| 203415_at   | PDCD6   | 2.438808276 | 1.260120752 | 3.073192918 |
| 201132_at   | HNRNPH2 | 1.958201637 | 1.257565746 | 2.462567301 |
| 221194_s_at | RNFT1   | 1.96289022  | 1.254368329 | 2.462187325 |
| 217932_at   | MRPS7   | 1.36066133  | 1.253888142 | 1.706117107 |
| 219819_s_at | MRPS28  | 1.316340573 | 1.252244181 | 1.648379823 |
| 202165_at   | PPP1R2  | 1.770237061 | 1.24986162  | 2.21255136  |
| 212121_at   | TCTN3   | 1.518353655 | 1.249373363 | 1.896990613 |
| 209022_at   | STAG2   | 1.479190807 | 1.248694284 | 1.847057107 |
| 222122_s_at | THOC2   | 1.772371644 | 1.247647677 | 2.211295364 |
| 219030_at   | TPRKB   | 1.715111767 | 1.246286003 | 2.137519789 |
| 201274_at   | PSMA5   | 2.271368732 | 1.24508649  | 2.828050522 |
| 210540_s_at | B4GALT4 | 1.412508994 | 1.244484617 | 1.757845714 |
| 211666_x_at | RPL3    | 1.667832434 | 1.244145576 | 2.075026344 |
| 209049_s_at | ZMYND8  | 1.329243714 | 1.244082014 | 1.653688197 |
| 215227_x_at | ACP1    | 2.005170169 | 1.243515919 | 2.493461024 |

|             |          |             |             |             |
|-------------|----------|-------------|-------------|-------------|
| 217099_s_at | GEMIN4   | 1.642599155 | 1.238629926 | 2.03457247  |
| 212260_at   | GIGYF2   | 1.424253378 | 1.237868691 | 1.763038665 |
| 212749_s_at | RCHY1    | 1.767133121 | 1.231906444 | 2.176942679 |
| 208600_s_at | GPR39    | 1.562086549 | 1.231118329 | 1.923113382 |
| 204699_s_at | C1orf107 | 2.417518298 | 1.225284726 | 2.962148245 |
| 216977_x_at | SNRPA1   | 1.472912895 | 1.221479411 | 1.799132775 |
| 213503_x_at | ANXA2    | 1.47351781  | 1.22054792  | 1.798499098 |
| 201847_at   | LIPA     | 1.64057093  | 1.219816272 | 2.001195116 |
| 210427_x_at | ANXA2    | 1.48285211  | 1.216254917 | 1.80352617  |
| 221437_s_at | MRPS15   | 2.627909323 | 1.215567555 | 3.194401312 |
| 204496_at   | STRN3    | 1.590631013 | 1.21216869  | 1.928113112 |
| 215773_x_at | PARP2    | 1.460768327 | 1.212122351 | 1.770629939 |
| 203465_at   | MRPL19   | 2.516133409 | 1.211040169 | 3.04713863  |
| 209175_at   | SEC23IP  | 2.643364265 | 1.209556591 | 3.197298667 |
| 208047_s_at | NAB1     | 1.414264994 | 1.209140222 | 1.710044689 |
| 217745_s_at | NAT13    | 2.611285181 | 1.208582541 | 3.155953679 |
| 200593_s_at | HNRNPU   | 1.885496633 | 1.207563996 | 2.276857849 |
| 203676_at   | GNS      | 2.205775503 | 1.207212447 | 2.662839643 |
| 221808_at   | RAB9A    | 2.288627876 | 1.207180221 | 2.762786306 |
| 205480_s_at | UGP2     | 1.971063714 | 1.205737218 | 2.376584879 |
| 205084_at   | BCAP29   | 1.564322859 | 1.205734759 | 1.886158445 |
| 217890_s_at | PARVA    | 1.698005147 | 1.205182209 | 2.046405593 |
| 209856_x_at | ABI2     | 1.450400501 | 1.204628447 | 1.747193703 |
| 201590_x_at | ANXA2    | 1.457991337 | 1.204199844 | 1.75571294  |
| 202142_at   | COPS8    | 2.108343246 | 1.203365507 | 2.53710754  |
| 204216_s_at | ZC3H14   | 1.978143175 | 1.201792133 | 2.377316906 |
| 213655_at   | YWHAE    | 1.601369147 | 1.2008877   | 1.923064511 |
| 218360_at   | RAB22A   | 1.303302581 | 1.19647849  | 1.559373504 |
| 211505_s_at | STAU1    | 1.76919242  | 1.196077255 | 2.116090814 |
| 211376_s_at | NSMCE4A  | 2.280564721 | 1.195625285 | 2.726700845 |
| 218558_s_at | MRPL39   | 2.551562215 | 1.195344509 | 3.049995883 |
| 218668_s_at | RAP2C    | 1.738870345 | 1.193566999 | 2.075458259 |
| 218598_at   | RINT1    | 1.309713056 | 1.191875601 | 1.561015036 |
| 201068_s_at | PSMC2    | 1.476902117 | 1.187650352 | 1.754043319 |
| 202413_s_at | USP1     | 1.402708554 | 1.183654404 | 1.660322158 |
| 210573_s_at | POLR3C   | 1.659846749 | 1.183651773 | 1.964680548 |
| 211672_s_at | ARPC4    | 1.487661421 | 1.180954738 | 1.756860804 |
| 210907_s_at | PDCD10   | 1.861413457 | 1.179532864 | 2.195598347 |
| 201699_at   | PSMC6    | 1.745734526 | 1.178517851 | 2.057379303 |
| 209085_x_at | RFC1     | 2.01168279  | 1.177646545 | 2.369051287 |
| 219649_at   | ALG6     | 1.319615263 | 1.171947032 | 1.546519191 |
| 202214_s_at | CUL4B    | 1.317906852 | 1.169976149 | 1.541919583 |
| 220588_at   | BCAS4    | 1.507272705 | 1.169535205 | 1.762808492 |
| 202704_at   | TOB1     | 1.886258782 | 1.167866731 | 2.202898878 |
| 220631_at   | OSGEPL1  | 1.359068963 | 1.167513883 | 1.586731882 |
| 211714_x_at | TUBB     | 1.408309913 | 1.166225406 | 1.6424068   |
| 203433_at   | MTHFS    | 2.465168399 | 1.166221415 | 2.874932179 |
| 200984_s_at | CD59     | 1.872443713 | 1.166001916 | 2.183272957 |
| 202300_at   | HBXIP    | 1.600645781 | 1.164756376 | 1.864362379 |
| 212522_at   | PDE8A    | 2.070625886 | 1.164330692 | 2.41089327  |
| 200934_at   | DEK      | 1.600975187 | 1.162582588 | 1.861265875 |
| 206052_s_at | SLBP     | 2.044749077 | 1.161793194 | 2.375575562 |
| 206992_s_at | ATP5S    | 1.573294949 | 1.161792426 | 1.827842156 |
| 218229_s_at | POGK     | 1.931136715 | 1.160648596 | 2.241371117 |
| 220607_x_at | TH1L     | 1.624138601 | 1.157335922 | 1.879673945 |
| 209026_x_at | TUBB     | 1.339232027 | 1.157295098 | 1.549886659 |
| 218894_s_at | MAGOHB   | 2.547781573 | 1.152313492 | 2.935843083 |
| 211098_x_at | TMCO1    | 1.44965992  | 1.151305174 | 1.669000966 |
| 202776_at   | DNTTIP2  | 1.490770196 | 1.151113443 | 1.716045612 |
| 202309_at   | MTHFD1   | 2.452917899 | 1.149033747 | 2.818485445 |
| 218123_at   | C21orf59 | 2.306312857 | 1.14541641  | 2.641688593 |

|             |          |             |             |             |
|-------------|----------|-------------|-------------|-------------|
| 202487_s_at | H2AFV    | 1.678083479 | 1.144742393 | 1.920973298 |
| 219207_at   | EDC3     | 1.550721147 | 1.143491714 | 1.773236781 |
| 200669_s_at | UBE2D3   | 1.710477458 | 1.142271275 | 1.953829266 |
| 213754_s_at | PAIP1    | 2.146455154 | 1.14203657  | 2.451330282 |
| 201091_s_at | CBX3     | 1.78117428  | 1.141450885 | 2.033122959 |
| 201825_s_at | SCCPDH   | 1.799452009 | 1.140886531 | 2.05297056  |
| 200821_at   | LAMP2    | 1.461459313 | 1.132839508 | 1.655598848 |
| 200033_at   | DDX5     | 1.804770566 | 1.131881784 | 2.042786929 |
| 219275_at   | PDCD5    | 1.34682981  | 1.131798226 | 1.524339589 |
| 219675_s_at | UXS1     | 1.89504069  | 1.131679309 | 2.144578339 |
| 221265_s_at | C15orf44 | 1.31328861  | 1.131291652 | 1.485712441 |
| 208778_s_at | TCP1     | 2.981865002 | 1.130528822 | 3.371084328 |
| 200072_s_at | HNRNPM   | 2.197044605 | 1.129623583 | 2.481833398 |
| 213404_s_at | RHEB     | 1.795463964 | 1.129541364 | 2.028050815 |
| 201676_x_at | PSMA1    | 1.693705389 | 1.123113931 | 1.902224117 |
| 207630_s_at | CREM     | 1.826174639 | 1.122977774 | 2.050753531 |
| 218482_at   | ENY2     | 1.728441072 | 1.121873474 | 1.939092191 |
| 219177_at   | BXDC2    | 1.566939321 | 1.119250473 | 1.753797576 |
| 201351_s_at | YME1L1   | 1.563937886 | 1.119099455 | 1.750202036 |
| 204833_at   | ATG12    | 1.471241459 | 1.116822476 | 1.64311553  |
| 217879_at   | CDC27    | 1.532441995 | 1.11421814  | 1.707474668 |
| 208066_s_at | GTF2B    | 1.738925966 | 1.113616801 | 1.936497172 |
| 205061_s_at | EXOSC9   | 1.744404488 | 1.108937469 | 1.934435497 |
| 211746_x_at | PSMA1    | 1.92075732  | 1.108466983 | 2.129096072 |
| 206989_s_at | SFRS2IP  | 1.443981407 | 1.107620695 | 1.59938369  |
| 212712_at   | CAMSAP1  | 2.929425932 | 1.099489787 | 3.220873894 |
| 202522_at   | PITPNB   | 2.038690095 | 1.097788    | 2.238049522 |
| 201931_at   | ETFA     | 2.12688323  | 1.097214409 | 2.333646927 |
| 202483_s_at | RANBP1   | 1.353211584 | 1.097176204 | 1.484711549 |
| 204832_s_at | BMPR1A   | 1.577462333 | 1.096348904 | 1.7294491   |
| 217834_s_at | SYNCRIP  | 1.560206423 | 1.095211275 | 1.708755665 |
| 217907_at   | MRPL18   | 2.147311556 | 1.09029789  | 2.341209259 |
| 210028_s_at | ORC3L    | 1.792968924 | 1.090105647 | 1.954525548 |
| 208663_s_at | TTC3     | 1.868486178 | 1.09005312  | 2.036749188 |
| 211985_s_at | CALM1    | 1.580325736 | 1.089944897 | 1.722467972 |
| 200084_at   | C11orf58 | 1.343427712 | 1.089078977 | 1.463098879 |
| 210947_s_at | MSH3     | 1.707578336 | 1.088946004 | 1.859460605 |
| 218866_s_at | POLR3K   | 2.788547828 | 1.088906734 | 3.036468509 |
| 209284_s_at | C3orf63  | 1.936777189 | 1.085024443 | 2.101450591 |
| 200664_s_at | DNAJB1   | 1.601871082 | 1.08486607  | 1.737815586 |
| 208842_s_at | GORASP2  | 1.619492897 | 1.083454843 | 1.754647423 |
| 214875_x_at | APLP2    | 1.371245746 | 1.079240114 | 1.479903415 |
| 217956_s_at | ENOPH1   | 2.054064392 | 1.076423389 | 2.211042954 |
| 214251_s_at | NUMA1    | 1.999738336 | 1.075832553 | 2.1513836   |
| 211594_s_at | MRPL9    | 1.893239597 | 1.075382128 | 2.035956027 |
| 214711_at   | GATC     | 1.523931402 | 1.072870491 | 1.634981031 |
| 202055_at   | KPNA1    | 2.57232619  | 1.070953199 | 2.754840963 |
| 212986_s_at | TLK2     | 1.319185196 | 1.067075218 | 1.40766983  |
| 200057_s_at | NONO     | 1.835343153 | 1.066075545 | 1.956614452 |
| 212833_at   | SLC25A46 | 1.613710674 | 1.066035032 | 1.72027211  |
| 210011_s_at | EWSR1    | 2.2666392   | 1.06547367  | 2.415044386 |
| 203197_s_at | C1orf123 | 1.542757873 | 1.064733551 | 1.642626069 |
| 209247_s_at | ABCF2    | 1.829166363 | 1.064606441 | 1.947342292 |
| 217322_x_at | None     | 1.483396954 | 1.064337323 | 1.578834742 |
| 204835_at   | POLA1    | 1.740577924 | 1.064212557 | 1.852344883 |
| 210460_s_at | PSMD4    | 1.82127519  | 1.06370444  | 1.937298507 |
| 201202_at   | PCNA     | 2.902603153 | 1.063235338 | 3.086150245 |
| 212711_at   | CAMSAP1  | 3.015680277 | 1.060250423 | 3.197376289 |
| 218343_s_at | GTF3C3   | 1.527224774 | 1.051765909 | 1.606282953 |
| 203194_s_at | NUP98    | 3.600121644 | 1.047492969 | 3.771102111 |
| 214795_at   | ZMYND8   | 1.408715193 | 1.046995753 | 1.474918824 |

|                           |          |             |              |              |
|---------------------------|----------|-------------|--------------|--------------|
| 219193_at                 | WDR70    | 2.030537173 | 1.046750553  | 2.125465907  |
| 216988_s_at               | PTP4A2   | 3.152632595 | 1.046441622  | 3.299045966  |
| 219924_s_at               | ZMYM6    | 1.713159312 | 1.044637406  | 1.789630301  |
| 217832_at                 | SYNCRIP  | 1.425524047 | 1.044264874  | 1.48862469   |
| AFFX-HUMGAPDH/M33197_5_at | GAPDH    | 2.026948073 | 1.041558691  | 2.111185382  |
| 202679_at                 | NPC1     | 1.649772294 | 1.035926071  | 1.70904213   |
| 218488_at                 | EIF2B3   | 1.542799096 | 1.034417115  | 1.595897789  |
| 208679_s_at               | ARPC2    | 2.041612902 | 1.033674628  | 2.110363456  |
| 201947_s_at               | CCT2     | 2.546236768 | 1.032420954  | 2.628788194  |
| 214550_s_at               | TNPO3    | 1.524506584 | 1.031223997  | 1.572107773  |
| 213180_s_at               | GOSR2    | 2.294370255 | 1.028469234  | 2.359689218  |
| 212196_at                 | IL6ST    | 2.276028252 | 1.027311266  | 2.338189465  |
| 220363_s_at               | ELMO2    | 2.367346104 | 1.026366146  | 2.429763896  |
| 205459_s_at               | NPAS2    | 1.898708173 | 1.025338979  | 1.946819499  |
| 218827_s_at               | CEP192   | 1.672448682 | 1.019750623  | 1.705480585  |
| 218569_s_at               | KBTBD4   | 1.403624183 | 1.018774915  | 1.429977108  |
| 214155_s_at               | LARP4    | 1.623577698 | 1.017634322  | 1.652208389  |
| 201318_s_at               | None     | 1.89854344  | 1.015340623  | 1.927668279  |
| 210458_s_at               | TANK     | 1.458218241 | 1.013704645  | 1.478202604  |
| 214300_s_at               | TOP3A    | 1.620416365 | 1.010831718  | 1.637968259  |
| 200750_s_at               | RAN      | 3.702048329 | 1.010349572  | 3.740362945  |
| 208777_s_at               | PSMD11   | 2.98886846  | 1.009114033  | 3.016109106  |
| 206044_s_at               | BRAF     | 1.601772835 | 1.006435889  | 1.612081666  |
| 201713_s_at               | RANBP2   | 1.580830724 | 1.005664552  | 1.589785422  |
| 209084_s_at               | RFC1     | 1.704828972 | 1.004906965  | 1.713194508  |
| 209450_at                 | OSGEP    | 1.618671407 | 1.000600785  | 1.619643881  |
| 208784_s_at               | KLHDC3   | 1.482802962 | -1.000826666 | -1.484028745 |
| 212802_s_at               | GAPVD1   | 1.469647658 | -1.002074397 | -1.472696291 |
| 215404_x_at               | FGFR1    | 2.114629318 | -1.002918355 | -2.120800558 |
| 202344_at                 | HSF1     | 1.393076203 | -1.003024455 | -1.397289499 |
| 208030_s_at               | ADD1     | 1.334480877 | -1.003056452 | -1.338559654 |
| 202096_s_at               | TSPO     | 1.815305968 | -1.005254938 | -1.824845289 |
| 212890_at                 | SLC38A10 | 1.452079175 | -1.005357976 | -1.45985938  |
| 203503_s_at               | PEX14    | 2.200875697 | -1.00775994  | -2.217954361 |
| 215208_x_at               | RPL35A   | 1.617639198 | -1.009017763 | -1.632226684 |
| 206106_at                 | MAPK12   | 1.922872323 | -1.009491852 | -1.941123944 |
| 201441_at                 | COX6B1   | 1.599172645 | -1.010417311 | -1.615831725 |
| 202187_s_at               | PPP2R5A  | 1.969988772 | -1.010554489 | -1.990780997 |
| 201949_x_at               | CAPZB    | 3.462272546 | -1.011356568 | -3.501592078 |
| 212152_x_at               | ARID1A   | 1.845864443 | -1.011577337 | -1.867234637 |
| 213279_at                 | DHRS1    | 1.316654435 | -1.011754964 | -1.332131661 |
| 213660_s_at               | TOP3B    | 1.304227021 | -1.012885443 | -1.321032563 |
| 218745_x_at               | TMEM161A | 1.490856425 | -1.013016727 | -1.510262495 |
| 218132_s_at               | TSEN34   | 2.030835765 | -1.013658794 | -2.058574531 |
| 205205_at                 | RELB     | 1.551169347 | -1.014122501 | -1.573075737 |
| 206056_x_at               | SPN      | 2.228448991 | -1.015262893 | -2.262461568 |
| 219379_x_at               | ZNF358   | 2.666252538 | -1.01539055  | -2.707287631 |
| 203155_at                 | SETDB1   | 1.93717193  | -1.016223924 | -1.968600459 |
| 203080_s_at               | BAZ2B    | 2.4832914   | -1.016822231 | -2.525065901 |
| 202876_s_at               | PBX2     | 1.42310765  | -1.018200552 | -1.449008995 |
| 212384_at                 | BAT1     | 1.906111996 | -1.018707893 | -1.941771335 |
| 218240_at                 | NKIRAS2  | 1.454898989 | -1.020015426 | -1.484019412 |
| 221907_at                 | TRMT61A  | 1.591331097 | -1.020185056 | -1.623452204 |
| 222200_s_at               | BSDC1    | 2.351120368 | -1.02094202  | -2.400357579 |
| 204449_at                 | PDCL     | 1.75477169  | -1.021188458 | -1.791952596 |
| 208728_s_at               | CDC42    | 1.886044393 | -1.022036714 | -1.927606615 |
| 213517_at                 | PCBP2    | 1.66249641  | -1.024656931 | -1.703488469 |
| 208713_at                 | HNRNPUL1 | 2.327941966 | -1.025244483 | -2.386709657 |
| 214808_at                 | None     | 1.327825902 | -1.025945143 | -1.362276534 |
| 221769_at                 | SPSB3    | 1.550328998 | -1.02659998  | -1.591567719 |

|             |            |             |              |              |
|-------------|------------|-------------|--------------|--------------|
| 32029_at    | PDPK1      | 1.413696206 | -1.027494815 | -1.452565522 |
| 205449_at   | SAC3D1     | 1.766242085 | -1.030677723 | -1.820426371 |
| 218335_x_at | TNIP2      | 1.345279293 | -1.030832542 | -1.386757673 |
| 219838_at   | TTC23      | 1.489952146 | -1.031821081 | -1.537364033 |
| 203643_at   | ERF        | 1.646088957 | -1.032500297 | -1.699587337 |
| 218155_x_at | TSR1       | 3.287067186 | -1.032780752 | -3.394819719 |
| 219333_s_at | CAPN10     | 2.84724133  | -1.033201937 | -2.941775258 |
| 211752_s_at | NDUFS7     | 1.430551238 | -1.036118244 | -1.482220237 |
| 207798_s_at | ATXN2L     | 2.144606495 | -1.036412949 | -2.222697941 |
| 201059_at   | CTTN       | 1.979340363 | -1.046366307 | -2.071115066 |
| 221767_x_at | HDLBP      | 2.22624431  | -1.046553412 | -2.329883578 |
| 202044_at   | GRLF1      | 2.288050875 | -1.046939578 | -2.395451018 |
| 213474_at   | KCTD7      | 1.878068745 | -1.047863089 | -1.967958916 |
| 45572_s_at  | GGA1       | 1.62242486  | -1.048483031 | -1.701084934 |
| 212101_at   | KPNA6      | 1.348450329 | -1.050555557 | -1.416621986 |
| 211040_x_at | GTSE1      | 1.524896361 | -1.051670923 | -1.603689163 |
| 209238_at   | STX3       | 2.517779852 | -1.054478598 | -2.654944968 |
| 220079_s_at | USP48      | 2.015952931 | -1.054512448 | -2.12584746  |
| 212111_at   | STX12      | 1.505427504 | -1.055590107 | -1.589114379 |
| 203055_s_at | ARHGEF1    | 2.009297052 | -1.057294233 | -2.124418186 |
| 218962_s_at | TMEM168    | 1.886018752 | -1.057349697 | -1.994181355 |
| 214017_s_at | DHX34      | 2.043872457 | -1.061425636 | -2.169418623 |
| 221904_at   | FAM131A    | 1.696308255 | -1.061742087 | -1.801041867 |
| 221818_at   | INTS5      | 2.198366598 | -1.062690288 | -2.336182833 |
| 213227_at   | PGRMC2     | 1.828473418 | -1.065101929 | -1.947510565 |
| 208190_s_at | LSR        | 1.306665003 | -1.066212905 | -1.393183088 |
| 210723_x_at | NCRNA00093 | 1.451538068 | -1.067345712 | -1.549292933 |
| 215928_at   | None       | 2.814102427 | -1.068726681 | -3.007506346 |
| 38340_at    | HIP1R      | 1.314192763 | -1.069800917 | -1.405924623 |
| 44696_at    | TBC1D13    | 1.806260133 | -1.072353276 | -1.936948972 |
| 219002_at   | FASTKD1    | 2.148590531 | -1.072495505 | -2.304353686 |
| 218893_at   | ISOC2      | 1.414576845 | -1.073262644 | -1.518212484 |
| 39705_at    | SIN3B      | 2.411083923 | -1.074027251 | -2.589569839 |
| 204859_s_at | APAF1      | 1.661528314 | -1.076871013 | -1.789251679 |
| 216144_at   | None       | 2.117415434 | -1.078339683 | -2.283293087 |
| 57539_at    | LIME1      | 1.575271952 | -1.07942853  | -1.700393487 |
| 77508_r_at  | RABEP2     | 1.381375832 | -1.080251955 | -1.492233943 |
| 212209_at   | MED13L     | 1.705004241 | -1.082318405 | -1.84535747  |
| 208238_x_at | None       | 2.099608752 | -1.083256258 | -2.274414319 |
| 36129_at    | SGSM2      | 1.63896054  | -1.083701737 | -1.776144385 |
| 221762_s_at | PCIF1      | 1.410609602 | -1.08401939  | -1.52912816  |
| 221998_s_at | VRK3       | 1.810643557 | -1.084219964 | -1.963135893 |
| 215595_x_at | None       | 2.280164319 | -1.084806907 | -2.473538003 |
| 203950_s_at | CLCN6      | 1.366850596 | -1.085631592 | -1.483896188 |
| 206848_at   | HOXA7      | 1.513239102 | -1.086619429 | -1.644315009 |
| 203938_s_at | TAF1C      | 1.972025332 | -1.086663585 | -2.142928117 |
| 217446_x_at | None       | 2.916940517 | -1.088856251 | -3.176128917 |
| 212218_s_at | FASN       | 1.361863444 | -1.089581548 | -1.483861279 |
| 210649_s_at | ARID1A     | 2.43563006  | -1.089812853 | -2.654380945 |
| 218407_x_at | NENF       | 1.321787616 | -1.090518128 | -1.441433357 |
| 213313_at   | RABGAP1    | 1.903615468 | -1.090813947 | -2.076490303 |
| 213842_x_at | NSUN5C     | 1.449507485 | -1.091160398 | -1.581645165 |
| 215568_x_at | LYPLA2     | 3.152302348 | -1.091412815 | -3.44046318  |
| 219186_at   | ZBTB7A     | 1.538252589 | -1.091666786 | -1.679259259 |
| 202702_at   | TRIM26     | 1.560329804 | -1.091963266 | -1.703822829 |
| 205370_x_at | DBT        | 2.542941759 | -1.093809929 | -2.781494946 |
| 209561_at   | THBS3      | 1.522006015 | -1.095757097 | -1.667748892 |
| 212329_at   | SCAP       | 2.171960858 | -1.095770342 | -2.379970291 |
| 212319_at   | SGSM2      | 1.91585642  | -1.095946156 | -2.09967548  |
| 221005_s_at | PTDSS2     | 1.314867674 | -1.097203281 | -1.442677126 |
| 220777_at   | KIF13A     | 1.701899703 | -1.097629282 | -1.868054949 |



|             |           |             |              |              |
|-------------|-----------|-------------|--------------|--------------|
| 218697_at   | NCKIPSD   | 1.35305395  | -1.098017729 | -1.485677225 |
| 203916_at   | NDST2     | 1.852983293 | -1.098219039 | -2.034981532 |
| 219696_at   | DENND1B   | 1.697859163 | -1.099139452 | -1.866183991 |
| 218522_s_at | MAP1S     | 1.360923248 | -1.099976932 | -1.496984178 |
| 206048_at   | OVOL2     | 3.021096232 | -1.103642702 | -3.33421081  |
| 53968_at    | INTS5     | 2.36840069  | -1.10373821  | -2.614094338 |
| 210705_s_at | TRIM5     | 2.064779808 | -1.106432384 | -2.284539246 |
| 41858_at    | FRAG1     | 2.198426837 | -1.107128574 | -2.433941169 |
| 56829_at    | TRAPPC9   | 1.546952665 | -1.112065172 | -1.72031218  |
| 202960_s_at | MUT       | 1.514713865 | -1.112605973 | -1.685279694 |
| 218777_at   | REEP4     | 2.309235559 | -1.11371257  | -2.571824669 |
| 206487_at   | UNC84A    | 1.554758364 | -1.114065862 | -1.732103217 |
| 216211_at   | None      | 1.469059515 | -1.114275125 | -1.636936475 |
| 211424_x_at | METTL7A   | 2.468993547 | -1.114677148 | -2.752130685 |
| 40446_at    | PHF1      | 2.010071638 | -1.11651711  | -2.244279376 |
| 201701_s_at | PGRMC2    | 2.198116095 | -1.117260565 | -2.455868431 |
| 221506_s_at | TNPO2     | 2.725267909 | -1.118320622 | -3.047723302 |
| 222128_at   | NSUN6     | 1.588766535 | -1.11946795  | -1.778573216 |
| 203174_s_at | ARFRP1    | 1.970915219 | -1.119530527 | -2.206499754 |
| 217544_at   | LOC729806 | 1.60267632  | -1.120128262 | -1.795203041 |
| 50277_at    | GGA1      | 2.002695778 | -1.120556288 | -2.244133348 |
| 215179_x_at | PGF       | 2.800194226 | -1.120901205 | -3.138741082 |
| 213685_at   | None      | 1.320764522 | -1.121949357 | -1.481830906 |
| 217855_x_at | SDF4      | 1.503430313 | -1.122109067 | -1.687012787 |
| 215529_x_at | DIP2A     | 2.149185791 | -1.123734956 | -2.4151152   |
| 205750_at   | BPHL      | 1.659177158 | -1.124316708 | -1.8654406   |
| 202040_s_at | JARID1A   | 2.999059476 | -1.125272401 | -3.374758858 |
| 202354_s_at | GTF2F1    | 1.536238603 | -1.125726194 | -1.729384035 |
| 201933_at   | CHMP1A    | 2.734257401 | -1.125771316 | -3.078148553 |
| 221848_at   | ZGPAT     | 2.137222507 | -1.126703624 | -2.408016343 |
| 206257_at   | CCDC9     | 3.173965176 | -1.126782132 | -3.576367249 |
| 203825_at   | BRD3      | 2.478184732 | -1.127039298 | -2.793011582 |
| 213445_at   | ZC3H3     | 1.496739729 | -1.130220864 | -1.691646469 |
| 221006_s_at | SNX27     | 1.40918     | -1.131907074 | -1.59506081  |
| 219019_at   | LRDD      | 2.343558266 | -1.132868297 | -2.654942863 |
| 215600_x_at | FBXW12    | 2.008105276 | -1.133664349 | -2.276517359 |
| 209413_at   | B4GALT2   | 1.925033332 | -1.13478666  | -2.184502145 |
| 211779_x_at | AP2A2     | 2.087044635 | -1.135129588 | -2.369066116 |
| 38892_at    | KIAA0240  | 1.989350046 | -1.137038178 | -2.26196695  |
| 221267_s_at | FAM108A1  | 1.385404424 | -1.138954029 | -1.57791195  |
| 211136_s_at | CLPTM1    | 1.963008596 | -1.139554384 | -2.236955053 |
| 203686_at   | MPG       | 3.080184168 | -1.141015134 | -3.51453675  |
| 219290_x_at | DAPP1     | 3.919956087 | -1.141779035 | -4.475723678 |
| 217729_s_at | AES       | 1.413686086 | -1.143904241 | -1.617121509 |
| 220113_x_at | POLR1B    | 2.264493557 | -1.14450777  | -2.591730471 |
| 208759_at   | NCSTN     | 2.526905059 | -1.144701098 | -2.892550997 |
| 214188_at   | None      | 1.486858048 | -1.148276918 | -1.707324777 |
| 203749_s_at | RARA      | 2.0587962   | -1.149463334 | -2.366510745 |
| 206551_x_at | KLHL24    | 2.075517893 | -1.149723803 | -2.386272326 |
| 213460_x_at | NSUN5C    | 1.571506653 | -1.149911628 | -1.807093775 |
| 220525_s_at | AUP1      | 1.962660138 | -1.151245596 | -2.25950384  |
| 219224_x_at | ZNF408    | 1.599567741 | -1.153268972 | -1.844731844 |
| 202292_x_at | LYPLA2    | 2.640061742 | -1.15385245  | -3.046241708 |
| 213127_s_at | MED8      | 2.137645183 | -1.155550716 | -2.470157422 |
| 214751_at   | ZNF468    | 2.130163788 | -1.155561389 | -2.461535025 |
| 203831_at   | R3HDM2    | 2.705415753 | -1.15565704  | -3.126532762 |
| 222125_s_at | P4HTM     | 1.317773926 | -1.158373757 | -1.526474733 |
| 203522_at   | CCS       | 1.550081411 | -1.159156225 | -1.796786517 |
| 203330_s_at | STX5      | 1.648655201 | -1.159984378 | -1.912414278 |
| 215373_x_at | IBD12     | 2.136370954 | -1.160660846 | -2.47960212  |
| 202102_s_at | BRD4      | 2.597533269 | -1.161982993 | -3.018289481 |

|             |           |             |              |              |
|-------------|-----------|-------------|--------------|--------------|
| 218251_at   | MID1IP1   | 1.442544038 | -1.16359218  | -1.678532962 |
| 46256_at    | SPSB3     | 1.86329339  | -1.164065779 | -2.168996072 |
| 214722_at   | NOTCH2NL  | 1.869770011 | -1.164266381 | -2.176910363 |
| 44617_at    | OGFOD2    | 1.821716859 | -1.16514517  | -2.122564599 |
| 212147_at   | SMG5      | 2.601667114 | -1.165453395 | -3.03212177  |
| 37012_at    | CAPZB     | 3.64434435  | -1.16682018  | -4.252294531 |
| 204275_at   | SOLH      | 2.031531391 | -1.169215495 | -2.37529798  |
| 216858_x_at | None      | 2.663107334 | -1.169428513 | -3.114313649 |
| 38710_at    | OTUB1     | 1.354110286 | -1.17077327  | -1.585356127 |
| 219630_at   | PDZK1IP1  | 1.31790619  | -1.17093164  | -1.543178057 |
| 215978_x_at | LOC152719 | 2.192300333 | -1.172277312 | -2.569983942 |
| 216813_at   | None      | 2.417917934 | -1.17341201  | -2.837213942 |
| 221943_x_at | RPL38     | 1.612040337 | -1.175275083 | -1.89459084  |
| 209352_s_at | SIN3B     | 1.862577856 | -1.175539934 | -2.189534649 |
| 220319_s_at | MYLIP     | 1.940369434 | -1.177073664 | -2.28395776  |
| 218189_s_at | NANS      | 1.802514524 | -1.177720258 | -2.122857869 |
| 219188_s_at | MACROD1   | 1.52753803  | -1.178385057 | -1.800027989 |
| 211996_s_at | LOC23117  | 1.407673281 | -1.179399372 | -1.660208983 |
| 215846_at   | None      | 1.422992454 | -1.179894242 | -1.678980604 |
| 200747_s_at | NUMA1     | 2.220198103 | -1.179913496 | -2.619641705 |
| 215588_x_at | RIOK3     | 1.57466384  | -1.181014785 | -1.859701277 |
| 219999_at   | MAN2A2    | 1.796581071 | -1.181130083 | -2.121995949 |
| 218523_at   | LHPP      | 1.683842117 | -1.181954568 | -1.990224883 |
| 219625_s_at | COL4A3BP  | 1.453406448 | -1.182586024 | -1.718778152 |
| 215067_x_at | PRDX2     | 2.402345483 | -1.184195978 | -2.844847858 |
| 219907_at   | FRS3      | 2.194057237 | -1.185177901 | -2.60034815  |
| 214682_at   | LOC399491 | 1.473383789 | -1.185983725 | -1.747409195 |
| 222057_at   | NOL12     | 1.337112378 | -1.187019642 | -1.587178656 |
| 205980_s_at | PRR5      | 1.417456161 | -1.189925076 | -1.68666663  |
| 205441_at   | OCEL1     | 1.937467289 | -1.190341707 | -2.30624812  |
| 201598_s_at | INPPL1    | 2.595136884 | -1.19157117  | -3.092290293 |
| 203795_s_at | BCL7A     | 1.601365436 | -1.191956497 | -1.908757936 |
| 217734_s_at | WDR6      | 1.619295904 | -1.192721779 | -1.931369491 |
| 219966_x_at | BANP      | 3.295715922 | -1.192893236 | -3.93143723  |
| 203421_at   | TP53I11   | 1.346100534 | -1.194848772 | -1.60838657  |
| 219354_at   | KLHL26    | 1.689888629 | -1.196834388 | -2.022516823 |
| 218821_at   | NPEPL1    | 1.447497808 | -1.196871672 | -1.732469121 |
| 202356_s_at | GTF2F1    | 2.761565699 | -1.197874509 | -3.308009156 |
| 202109_at   | ARFIP2    | 1.462207326 | -1.198609104 | -1.752615012 |
| 214198_s_at | DGCR2     | 1.572635235 | -1.199263231 | -1.886003613 |
| 209262_s_at | NR2F6     | 1.550749294 | -1.199758919 | -1.860525297 |
| 215281_x_at | POGZ      | 1.898405128 | -1.203443591 | -2.284623484 |
| 214030_at   | CRYBG3    | 1.518115963 | -1.205533883 | -1.830140232 |
| 212177_at   | SFRS18    | 1.316474002 | -1.205561957 | -1.587090974 |
| 212001_at   | SFRS14    | 1.434517004 | -1.208414192 | -1.733490707 |
| 216117_at   | EXOSC2    | 1.743912881 | -1.209377039 | -2.109048198 |
| 207730_x_at | None      | 2.153453769 | -1.209746019 | -2.605132125 |
| 207435_s_at | SRRM2     | 1.511049329 | -1.210110098 | -1.828536051 |
| 200714_x_at | OS9       | 1.93320442  | -1.21099311  | -2.341097232 |
| 214902_x_at | None      | 2.750175532 | -1.21205972  | -3.333376985 |
| 201224_s_at | SRRM1     | 2.376226378 | -1.212936704 | -2.882212191 |
| 221649_s_at | PPAN      | 1.612345114 | -1.213934578 | -1.957281485 |
| 222190_s_at | C16orf58  | 1.69559413  | -1.215366883 | -2.060768952 |
| 218530_at   | FHOD1     | 2.102120414 | -1.216277968 | -2.556762747 |
| 39729_at    | PRDX2     | 2.583346819 | -1.217193284 | -3.144432399 |
| 41657_at    | STK11     | 2.080088188 | -1.218987819 | -2.535602164 |
| 212359_s_at | KIAA0913  | 2.534777823 | -1.219186508 | -3.090366923 |
| 218030_at   | GIT1      | 3.177940805 | -1.220974264 | -3.880183936 |
| 218083_at   | PTGES2    | 1.483781835 | -1.223265038 | -1.815058442 |
| 211464_x_at | CASP6     | 1.454702206 | -1.224678433 | -1.781542418 |
| 202573_at   | CSNK1G2   | 2.762614393 | -1.224767981 | -3.383561652 |

|             |           |             |              |              |
|-------------|-----------|-------------|--------------|--------------|
| 44669_at    | LOC644096 | 1.656956618 | -1.224860385 | -2.029540522 |
| 204740_at   | CNKSR1    | 2.049819185 | -1.225398219 | -2.511844779 |
| 209241_x_at | MINK1     | 2.181112255 | -1.225591964 | -2.673153653 |
| 212052_s_at | TBC1D9B   | 2.054280755 | -1.225757181 | -2.518049388 |
| 204442_x_at | LTBP4     | 1.314052889 | -1.228360651 | -1.614130862 |
| 206687_s_at | PTPN6     | 3.293768405 | -1.230342941 | -4.052464705 |
| 215604_x_at | None      | 2.496723009 | -1.231396458 | -3.074455871 |
| 219843_at   | IPP       | 1.594814277 | -1.231440151 | -1.963918334 |
| 211289_x_at | CDC2L2    | 1.745153052 | -1.233479535 | -2.152610574 |
| 210981_s_at | GRK6      | 1.624494145 | -1.237759696 | -2.010733379 |
| 211780_x_at | DCTN1     | 1.584535573 | -1.238604348 | -1.96261265  |
| 208137_x_at | ZNF611    | 2.539921729 | -1.239202758 | -3.147478011 |
| 212080_at   | MLL       | 2.399373994 | -1.239273475 | -2.973480547 |
| 35436_at    | GOLGA2    | 1.372948941 | -1.239393327 | -1.701623756 |
| 215566_x_at | LYPLA2    | 1.882444205 | -1.240404636 | -2.334992518 |
| 212726_at   | PHF2      | 1.55502855  | -1.240414912 | -1.928880602 |
| 35666_at    | SEMA3F    | 1.378370277 | -1.241798043 | -1.711657513 |
| 208774_at   | CSNK1D    | 3.641615005 | -1.242886708 | -4.526114885 |
| 214645_at   | None      | 1.450182998 | -1.245366049 | -1.80600867  |
| 212955_s_at | POLR2I    | 2.247337496 | -1.245633046 | -2.799357851 |
| 220661_s_at | ZNF692    | 1.835625953 | -1.245920573 | -2.287044138 |
| 214001_x_at | RPS10     | 1.93594095  | -1.249150123 | -2.418280876 |
| 214723_x_at | ANKRD36   | 1.591946617 | -1.251119585 | -1.99171559  |
| 214123_s_at | C4orf10   | 1.500096235 | -1.251575503 | -1.8774837   |
| 219755_at   | CBX8      | 1.569304027 | -1.251826564 | -1.964496468 |
| 202178_at   | PRKCZ     | 1.523801512 | -1.252032645 | -1.907849238 |
| 201321_s_at | SMARCC2   | 1.581130961 | -1.252079273 | -1.979701305 |
| 40850_at    | FKBP8     | 1.884172023 | -1.252827949 | -2.36054337  |
| 208297_s_at | EVI5      | 2.012189555 | -1.253593105 | -2.522466951 |
| 202871_at   | TRAF4     | 1.911406741 | -1.254630095 | -2.398108422 |
| 202135_s_at | ACTR1B    | 1.852328113 | -1.255919091 | -2.326374241 |
| 203288_at   | KIAA0355  | 1.636745726 | -1.256134768 | -2.055973213 |
| 213642_at   | None      | 1.608622419 | -1.256597032 | -2.021390157 |
| 220587_s_at | GBL       | 1.79543275  | -1.257362075 | -2.257509048 |
| 214674_at   | USP19     | 1.368475596 | -1.258287219 | -1.721935352 |
| 212625_at   | STX10     | 3.255567361 | -1.258790125 | -4.098076044 |
| 203175_at   | RHOG      | 1.453745288 | -1.259337569 | -1.830756057 |
| 201640_x_at | CLPTM1    | 1.350042842 | -1.260684613 | -1.701978237 |
| 64474_g_at  | TRMT2A    | 1.587682782 | -1.262065351 | -2.003759428 |
| 204512_at   | HIVEP1    | 2.960025373 | -1.262688104 | -3.737588826 |
| 203315_at   | NCK2      | 1.541450872 | -1.265878271 | -1.951289164 |
| 203942_s_at | MARK2     | 2.482695674 | -1.268268487 | -3.148724687 |
| 201320_at   | SMARCC2   | 2.122864803 | -1.268920503 | -2.693746674 |
| 218389_s_at | APH1A     | 1.606620221 | -1.269127995 | -2.039006699 |
| 203514_at   | MAP3K3    | 1.840342282 | -1.269175589 | -2.335717499 |
| 214740_at   | POLR2J2   | 1.370421379 | -1.269571847 | -1.739848401 |
| 40489_at    | ATN1      | 1.409814994 | -1.271293432 | -1.792288541 |
| 215628_x_at | None      | 2.844932321 | -1.271333362 | -3.616857372 |
| 216804_s_at | PDLIM5    | 2.183739022 | -1.271640688 | -2.776931394 |
| 214021_x_at | ITGB5     | 1.423366806 | -1.272934221 | -1.811852316 |
| 211065_x_at | PFKL      | 1.334272675 | -1.273231939 | -1.698838585 |
| 219906_at   | FLJ10213  | 1.573496227 | -1.274050088 | -2.004713007 |
| 52078_at    | TMEM222   | 1.458803457 | -1.27499358  | -1.859965042 |
| 218463_s_at | MUS81     | 2.289075577 | -1.27671794  | -2.922503854 |
| 202549_at   | VAPB      | 1.310099005 | -1.277877083 | -1.674145495 |
| 213368_x_at | PPFIA3    | 1.663843944 | -1.281992895 | -2.133036115 |
| 36084_at    | CUL7      | 1.407896866 | -1.283447555 | -1.806961791 |
| 205774_at   | F12       | 1.775996554 | -1.283824772 | -2.280068372 |
| 213758_at   | COX4I1    | 1.98000759  | -1.284248251 | -2.542821285 |
| 205025_at   | ZBTB48    | 1.427580391 | -1.286190998 | -1.836141049 |
| 215206_at   | None      | 1.502834579 | -1.286282343 | -1.933069585 |

|             |              |             |              |              |
|-------------|--------------|-------------|--------------|--------------|
| 213231_at   | DMWD         | 1.49518681  | -1.287032384 | -1.924353845 |
| 215032_at   | RREB1        | 3.351667755 | -1.289008382 | -4.32032783  |
| 204573_at   | CROT         | 2.042413549 | -1.291202359 | -2.637169193 |
| 217646_at   | SURF1        | 2.268271302 | -1.29129328  | -2.92900349  |
| 218038_at   | ATP5SL       | 1.305419949 | -1.29212723  | -1.686768663 |
| 212784_at   | CIC          | 1.612419599 | -1.293900246 | -2.086310117 |
| 204842_x_at | PRKAR2A      | 1.907580435 | -1.295908773 | -2.472050222 |
| 212695_at   | CRY2         | 2.056963698 | -1.295934279 | -2.665689767 |
| 207390_s_at | SMTN         | 2.189637276 | -1.297092012 | -2.84016102  |
| 214656_x_at | MYO1C        | 1.829974232 | -1.297227    | -2.373891983 |
| 202463_s_at | MBD3         | 1.896195327 | -1.297894304 | -2.461061115 |
| 211197_s_at | ICOSLG       | 1.395069984 | -1.298090911 | -1.810927666 |
| 201793_x_at | SMG7         | 1.909516067 | -1.298178328 | -2.478892375 |
| 203193_at   | ESRRA        | 1.398766598 | -1.298790505 | -1.816704775 |
| 214792_x_at | VAMP2        | 2.937637696 | -1.299143415 | -3.816412669 |
| 211503_s_at | RAB14        | 1.96631059  | -1.299452687 | -2.555127579 |
| 210443_x_at | OGFR         | 1.570427873 | -1.301397943 | -2.043751603 |
| 217931_at   | CNPY3        | 1.950872216 | -1.30165428  | -2.53936117  |
| 219453_at   | KLHL36       | 1.4929559   | -1.303330439 | -1.945814869 |
| 206792_x_at | PDE4C        | 2.372000326 | -1.30487045  | -3.095153131 |
| 201046_s_at | RAD23A       | 4.336268245 | -1.305001171 | -5.65883514  |
| 214259_s_at | AKR7A2       | 1.639386515 | -1.306119451 | -2.141234615 |
| 207643_s_at | TNFRSF1A     | 1.781302553 | -1.308002837 | -2.329948794 |
| 219429_at   | FA2H         | 1.347970187 | -1.308206283 | -1.763423067 |
| 48659_at    | RP5-1077B9.4 | 2.612144457 | -1.309765442 | -3.421296539 |
| 41386_i_at  | JMJD3        | 1.869649474 | -1.310821969 | -2.450777605 |
| 50376_at    | ZNF444       | 1.873437637 | -1.312007152 | -2.457963579 |
| 32099_at    | SAFB2        | 1.547920221 | -1.312262798 | -2.03127812  |
| 212383_at   | ATP6V0A1     | 1.675807115 | -1.312385359 | -2.199304723 |
| 222282_at   | None         | 1.420314197 | -1.312394316 | -1.864012278 |
| 203719_at   | ERCC1        | 2.108238303 | -1.315573908 | -2.773543304 |
| 205731_s_at | NCOA2        | 1.408102084 | -1.316620481 | -1.853936043 |
| 212146_at   | PLEKHM2      | 1.453614155 | -1.317142058 | -1.914616339 |
| 208871_at   | ATN1         | 4.941809817 | -1.317372171 | -6.510202729 |
| 214395_x_at | EEF1D        | 1.378882817 | -1.317792446 | -1.817081359 |
| 202993_at   | ILVBL        | 1.328490164 | -1.318318404 | -1.751373032 |
| 219413_at   | ACBD4        | 1.889873017 | -1.318454568 | -2.491711713 |
| 33760_at    | PEX14        | 1.576265068 | -1.319234067 | -2.079462576 |
| 221495_s_at | TCF25        | 1.459355373 | -1.320507436 | -1.927089622 |
| 219380_x_at | POLH         | 2.474901977 | -1.320869331 | -3.269022119 |
| 210717_at   | None         | 1.445990446 | -1.321632648 | -1.911068183 |
| 208246_x_at | None         | 2.863255541 | -1.322279109 | -3.786022985 |
| 35201_at    | HNRNPL       | 1.676173921 | -1.322949286 | -2.217493092 |
| 60528_at    | JMJD7        | 4.555471491 | -1.323031502 | -6.027032289 |
| 40149_at    | SH2B1        | 1.721307866 | -1.324224881 | -2.279398704 |
| 219392_x_at | PRR11        | 1.993481885 | -1.324766637 | -2.640898292 |
| 210825_s_at | PEBP1        | 1.917976558 | -1.32660002  | -2.544387739 |
| 202368_s_at | TRAM2        | 1.365903344 | -1.326628675 | -1.812046543 |
| 216310_at   | TAOK1        | 2.012329162 | -1.327301451 | -2.670967417 |
| 221832_s_at | LUZP1        | 2.148442686 | -1.328498434 | -2.854202744 |
| 203252_at   | CDK2AP2      | 2.140394663 | -1.329173086 | -2.844954979 |
| 208710_s_at | AP3D1        | 2.668651574 | -1.329913825 | -3.549076621 |
| 220036_s_at | LMBR1L       | 1.652504888 | -1.330725678 | -2.199030688 |
| 220081_x_at | HSD17B7      | 2.004405326 | -1.331573308 | -2.66901263  |
| 200070_at   | C2orf24      | 1.881574424 | -1.337892229 | -2.517343799 |
| 217612_at   | TIMM50       | 1.439770265 | -1.338205394 | -1.926708335 |
| 202015_x_at | METAP2       | 2.683310153 | -1.339543616 | -3.594410985 |
| 204927_at   | RASSF7       | 1.526363389 | -1.339558305 | -2.044652754 |
| 215620_at   | RREB1        | 1.318263501 | -1.340449602 | -1.767065785 |
| 209815_at   | PTCH1        | 1.805740716 | -1.341353949 | -2.42213744  |
| 221192_x_at | MFSD11       | 1.932634628 | -1.341549648 | -2.592725305 |

|             |              |             |              |              |
|-------------|--------------|-------------|--------------|--------------|
| 208987_s_at | FBXL11       | 2.6353182   | -1.342400643 | -3.537652847 |
| 218130_at   | C17orf62     | 1.820417075 | -1.34705637  | -2.452204417 |
| 212991_at   | FBXO9        | 1.323413694 | -1.347295148 | -1.783028848 |
| 218887_at   | MRPL2        | 2.089725866 | -1.347935921 | -2.816816561 |
| 206169_x_at | ZC3H7B       | 1.960874804 | -1.349809969 | -2.646808358 |
| 215316_at   | None         | 1.413115635 | -1.351444651 | -1.909747566 |
| 217286_s_at | NDRG3        | 1.922181878 | -1.351650437 | -2.598117976 |
| 211950_at   | UBR4         | 2.643280828 | -1.352773632 | -3.575760605 |
| 202182_at   | KAT2A        | 2.235150886 | -1.3551021   | -3.02885766  |
| 211730_s_at | POLR2L       | 1.401234688 | -1.355280556 | -1.899066126 |
| 220973_s_at | SHARPIN      | 1.5127852   | -1.356175484 | -2.051602201 |
| 204805_s_at | H1FX         | 1.845881527 | -1.356288324 | -2.503547562 |
| 203994_s_at | C21orf2      | 1.52932621  | -1.360344454 | -2.080410428 |
| 214486_x_at | CFLAR        | 1.468930754 | -1.360620318 | -1.99865703  |
| 213350_at   | RPS11        | 3.372011718 | -1.36341467  | -4.597450243 |
| 217297_s_at | MYO9B        | 1.972231807 | -1.364343519 | -2.690801684 |
| 201728_s_at | KIAA0100     | 1.815101786 | -1.364373892 | -2.476477487 |
| 211316_x_at | CFLAR        | 1.434638721 | -1.365808653 | -1.959441978 |
| 205964_at   | ZNF426       | 1.540681012 | -1.36727429  | -2.106533537 |
| 208369_s_at | GCDH         | 1.387744999 | -1.367788681 | -1.898141902 |
| 210172_at   | SF1          | 2.193182238 | -1.368072343 | -3.000431963 |
| 209013_x_at | TRIO         | 2.789806599 | -1.369240863 | -3.819917196 |
| 212759_s_at | TCF7L2       | 1.913620764 | -1.369782343 | -2.621243934 |
| 215377_at   | CTBP2        | 1.992558434 | -1.370094796 | -2.72999394  |
| 212930_at   | ATP2B1       | 2.689723896 | -1.371349242 | -3.688550825 |
| 217117_x_at | MUC3A        | 1.413483123 | -1.372521575 | -1.940036083 |
| 209703_x_at | METTL7A      | 2.769250965 | -1.373287554 | -3.802977884 |
| 215137_at   | RP11-374F3.4 | 1.77731123  | -1.373618892 | -2.441348283 |
| 214241_at   | NDUFB8       | 1.597179679 | -1.375076712 | -2.196244582 |
| 216187_x_at | None         | 2.797659118 | -1.375679997 | -3.848683686 |
| 203956_at   | MORC2        | 1.593137399 | -1.375744493 | -2.191750004 |
| 209370_s_at | SH3BP2       | 1.72584838  | -1.377321699 | -2.377048424 |
| 215359_x_at | ZNF44        | 1.606108005 | -1.377884544 | -2.213031396 |
| 215191_at   | None         | 1.884227212 | -1.378285959 | -2.597003909 |
| 219053_s_at | VPS37C       | 2.431773534 | -1.380008362 | -3.355867811 |
| 204824_at   | ENDOG        | 1.654127601 | -1.381282105 | -2.284816855 |
| 212512_s_at | CARM1        | 1.665968963 | -1.383075997 | -2.304161685 |
| 202072_at   | HNRNPL       | 1.534963713 | -1.385379458 | -2.126507197 |
| 201140_s_at | RAB5C        | 2.16930321  | -1.385430645 | -3.005419145 |
| 221569_at   | AHI1         | 2.363904036 | -1.385484112 | -3.275151486 |
| 211474_s_at | SERPINB6     | 1.551731967 | -1.388173614 | -2.154073371 |
| 218301_at   | RNPEPL1      | 1.669825719 | -1.388281664 | -2.318188429 |
| 205069_s_at | ARHGAP26     | 1.350537214 | -1.391035824 | -1.878645647 |
| 214829_at   | AASS         | 1.588837299 | -1.392395551 | -2.212289987 |
| 217891_at   | C16orf58     | 1.799848854 | -1.393684685 | -2.508421783 |
| 221887_s_at | DFNB31       | 1.363442952 | -1.393950167 | -1.900571531 |
| 220796_x_at | SLC35E1      | 2.961754061 | -1.394737114 | -4.130868311 |
| 202339_at   | SYMPK        | 3.035144819 | -1.396034353 | -4.237166433 |
| 202081_at   | IER2         | 2.06841802  | -1.398343366 | -2.892358616 |
| 222006_at   | LETM1        | 1.821438821 | -1.398792769 | -2.547815453 |
| 201480_s_at | SUPT5H       | 3.561120754 | -1.402368171 | -4.994002398 |
| 215887_at   | ZNF277       | 1.51447551  | -1.402602246 | -2.124206752 |
| 41160_at    | MBD3         | 2.349244379 | -1.402742433 | -3.295384776 |
| 215012_at   | ZNF451       | 1.410555236 | -1.402827097 | -1.978765107 |
| 212778_at   | PACS2        | 1.589579317 | -1.404742061 | -2.232948926 |
| 203388_at   | ARRB2        | 1.466573547 | -1.405472375 | -2.061228606 |
| 213394_at   | MAPKBP1      | 1.994640694 | -1.406441132 | -2.805344715 |
| 204921_at   | GAS8         | 2.628236274 | -1.40871646  | -3.7024397   |
| 215553_x_at | None         | 2.964228371 | -1.411071414 | -4.18273792  |
| 218920_at   | FLJ10404     | 2.077043964 | -1.411488846 | -2.931724387 |
| 201082_s_at | DCTN1        | 2.000944573 | -1.417200043 | -2.835738734 |

|             |          |             |              |              |
|-------------|----------|-------------|--------------|--------------|
| 215735_s_at | TSC2     | 1.526056544 | -1.417731353 | -2.163538209 |
| 218424_s_at | STEAP3   | 1.786899641 | -1.418813767 | -2.535277812 |
| 221920_s_at | SLC25A37 | 1.502421461 | -1.419238253 | -2.132294009 |
| 208751_at   | NAPA     | 1.922029426 | -1.420163332 | -2.729595713 |
| 204968_at   | C6orf47  | 1.926211836 | -1.42151035  | -2.738130061 |
| 212208_at   | MED13L   | 1.917089075 | -1.422390593 | -2.726849465 |
| 205353_s_at | PEBP1    | 1.790975978 | -1.422665736 | -2.547960159 |
| 208874_x_at | PPP2R4   | 1.629875493 | -1.424059944 | -2.321040404 |
| 218714_at   | PRR14    | 1.335508308 | -1.424726962 | -1.902734695 |
| 215764_x_at | AP2A2    | 2.239647798 | -1.424781875 | -3.191009589 |
| 202739_s_at | PHKB     | 2.225709536 | -1.42525215  | -3.172197301 |
| 203227_s_at | TSPAN31  | 2.829043375 | -1.426451626 | -4.035493523 |
| 219040_at   | CORO7    | 3.70025503  | -1.427084608 | -5.280576999 |
| 219206_x_at | TMBIM4   | 2.764749299 | -1.428173875 | -3.948542719 |
| 220934_s_at | None     | 1.888256338 | -1.432331796 | -2.704609592 |
| 201591_s_at | NISCH    | 2.096340562 | -1.43291296  | -3.00387356  |
| 216751_at   | None     | 1.818772413 | -1.433305418 | -2.606856353 |
| 222339_x_at | None     | 1.327480095 | -1.435052214 | -1.905003249 |
| 216105_x_at | PPP2R4   | 1.675751944 | -1.435146436 | -2.404949431 |
| 218665_at   | FZD4     | 1.360485653 | -1.435755742 | -1.953325089 |
| 221755_at   | EHBP1L1  | 1.4166785   | -1.43608867  | -2.034475942 |
| 206845_s_at | RNF40    | 1.346966641 | -1.436501176 | -1.934919165 |
| 213388_at   | PDE4DIP  | 1.528524101 | -1.436623633 | -2.195913847 |
| 208610_s_at | SRRM2    | 1.635356369 | -1.437145686 | -2.350245351 |
| 217844_at   | CTDSP1   | 2.36486364  | -1.439874489 | -3.405106825 |
| 203280_at   | SAFB2    | 1.560748237 | -1.440311336 | -2.247963379 |
| 202615_at   | GNAQ     | 1.791411361 | -1.444881334 | -2.588376837 |
| 217586_x_at | None     | 2.34158559  | -1.445416731 | -3.384566988 |
| 203384_s_at | GOLGA1   | 2.592192916 | -1.445550797 | -3.747146536 |
| 202802_at   | DHPS     | 1.471099128 | -1.455617909 | -2.141358237 |
| 207839_s_at | C9orf127 | 1.416744497 | -1.457163521 | -2.0644284   |
| 209364_at   | BAD      | 1.54042107  | -1.458211882 | -2.246260308 |
| 206352_s_at | PEX10    | 1.343818378 | -1.459224913 | -1.960933256 |
| 216472_at   | None     | 1.547332277 | -1.459554955 | -2.258416493 |
| 222131_x_at | RHOT2    | 2.305066258 | -1.460241742 | -3.365953967 |
| 218180_s_at | EPS8L2   | 1.5267374   | -1.464715806 | -2.236236402 |
| 205757_at   | ENTPD5   | 2.016840908 | -1.467621807 | -2.959959699 |
| 212401_s_at | CDC2L2   | 2.286116295 | -1.468220171 | -3.356522057 |
| 218206_x_at | SCAND1   | 1.882201185 | -1.47081382  | -2.768367515 |
| 207365_x_at | USP34    | 2.180591337 | -1.470951901 | -3.207544973 |
| 211031_s_at | CLIP2    | 1.897951806 | -1.472126365 | -2.794024893 |
| 45828_at    | ATP5SL   | 1.493856738 | -1.473724161 | -2.201532767 |
| 213885_at   | TRIM3    | 1.359029257 | -1.474341514 | -2.003673253 |
| 203297_s_at | JARID2   | 2.135629723 | -1.475236583 | -3.150559095 |
| 219346_at   | LRFN3    | 1.509613525 | -1.476737197 | -2.229302445 |
| 203239_s_at | CNOT3    | 3.570583605 | -1.477953333 | -5.277155939 |
| 213913_s_at | TBC1D30  | 2.359528407 | -1.478135701 | -3.487703174 |
| 215587_x_at | None     | 2.002973158 | -1.478590557 | -2.961577197 |
| 202321_at   | GGPS1    | 2.583569575 | -1.479905074 | -3.823437723 |
| 65884_at    | MAN1B1   | 1.452334518 | -1.483557293 | -2.154621467 |
| 55065_at    | MARK4    | 2.432015449 | -1.483646951 | -3.608252305 |
| 221888_at   | CC2D1A   | 2.732159385 | -1.484585069 | -4.05612303  |
| 47560_at    | LPHN1    | 1.48186614  | -1.48627205  | -2.202456226 |
| 214707_x_at | ALMS1    | 3.070157006 | -1.486712769 | -4.564441623 |
| 39817_s_at  | C6orf108 | 1.582401447 | -1.487406842 | -2.353674739 |
| 213840_s_at | MRPS12   | 1.602680448 | -1.489606164 | -2.387362674 |
| 203005_at   | LTBR     | 3.115464322 | -1.492495071 | -4.649815143 |
| 216338_s_at | YIPF3    | 1.530253868 | -1.494240878 | -2.286567884 |
| 204067_at   | SUOX     | 3.027535576 | -1.495343422 | -4.527205408 |
| 202621_at   | IRF3     | 2.104436218 | -1.495904961 | -3.148036578 |
| 222238_s_at | POLM     | 2.429285613 | -1.500088596 | -3.644143645 |

|             |           |             |              |              |
|-------------|-----------|-------------|--------------|--------------|
| 214782_at   | CTTN      | 1.664672447 | -1.500990948 | -2.498658274 |
| 205823_at   | RGS12     | 1.384976096 | -1.501607481 | -2.079690467 |
| 218679_s_at | VPS28     | 1.322223623 | -1.503646546 | -1.988156984 |
| 201331_s_at | STAT6     | 1.686291982 | -1.507145461 | -2.541487306 |
| 215147_at   | None      | 3.763077251 | -1.508504014 | -5.676617138 |
| 204828_at   | RAD9A     | 2.712547336 | -1.508623735 | -4.092213294 |
| 218262_at   | RMND5B    | 1.3397247   | -1.508818911 | -2.021401964 |
| 210647_x_at | PLA2G6    | 1.543475106 | -1.509488953 | -2.329858623 |
| 200827_at   | PLOD1     | 1.807018447 | -1.510765834 | -2.72998173  |
| 218762_at   | ZNF574    | 2.188539208 | -1.511876129 | -3.308800187 |
| 203488_at   | LPHN1     | 1.79906729  | -1.514588054 | -2.724845826 |
| 222372_at   | None      | 1.834639014 | -1.514902508 | -2.779299244 |
| 218004_at   | BSDC1     | 2.26121302  | -1.516387082 | -3.428874213 |
| 210977_s_at | HSF4      | 2.083390894 | -1.518728251 | -3.164104608 |
| 203655_at   | XRCC1     | 1.776911513 | -1.519302332 | -2.699665805 |
| 202492_at   | ATG9A     | 2.918582723 | -1.520385404 | -4.437370571 |
| 219541_at   | LIME1     | 1.951027458 | -1.52091373  | -2.967344448 |
| 213190_at   | COG7      | 2.741847737 | -1.521616338 | -4.172040312 |
| 210622_x_at | CDK10     | 1.597016719 | -1.524362977 | -2.43443316  |
| 43977_at    | TMEM161A  | 1.471384218 | -1.528100232 | -2.248422565 |
| 210958_s_at | MAST4     | 2.069342145 | -1.529980137 | -3.166052378 |
| 202913_at   | ARHGEF11  | 2.636492557 | -1.531024978 | -4.036535958 |
| 221496_s_at | TOB2      | 1.947387302 | -1.532608204 | -2.984581754 |
| 202093_s_at | PAF1      | 1.836502832 | -1.534433597 | -2.817991646 |
| 221855_at   | LOC644096 | 1.887448439 | -1.539805395 | -2.906303288 |
| 221250_s_at | MXD3      | 1.614781822 | -1.542317271 | -2.490505892 |
| 218900_at   | CNNM4     | 1.406461751 | -1.544524625 | -2.172314809 |
| 202959_at   | MUT       | 2.076682009 | -1.545927632 | -3.2104001   |
| 210719_s_at | HMG20B    | 2.537209784 | -1.546934359 | -3.924896992 |
| 214715_x_at | ZNF160    | 3.083069146 | -1.54760254  | -4.771365642 |
| 213944_x_at | GNA11     | 1.609528405 | -1.548213336 | -2.491893341 |
| 215754_at   | SCARB2    | 1.827687132 | -1.549624475 | -2.832228712 |
| 215605_at   | NCOA2     | 1.351722329 | -1.551365288 | -2.0970151   |
| 218874_s_at | C6orf134  | 1.841940453 | -1.553608204 | -2.8616538   |
| 203668_at   | MAN2C1    | 1.725139795 | -1.554641472 | -2.68197387  |
| 34406_at    | PACS2     | 1.786815962 | -1.557578741 | -2.783106557 |
| 201556_s_at | VAMP2     | 1.929080553 | -1.559498715 | -3.008398643 |
| 90610_at    | LRCH4     | 2.791040935 | -1.562211935 | -4.360197461 |
| 212332_at   | RBL2      | 1.791654961 | -1.562605055 | -2.799649099 |
| 211374_x_at | None      | 2.232624944 | -1.563037805 | -3.489677191 |
| 210069_at   | CPT1B     | 1.480814645 | -1.565148675 | -2.31769508  |
| 221860_at   | HNRNPL    | 2.073741906 | -1.565336706 | -3.246104324 |
| 212155_at   | RNF187    | 1.599413161 | -1.570282104 | -2.511529864 |
| 217914_at   | TPCN1     | 1.547478243 | -1.571239544 | -2.431459009 |
| 203117_s_at | PAN2      | 1.48085074  | -1.573458435 | -2.330057088 |
| 65770_at    | RHOT2     | 1.529513613 | -1.574885602 | -2.408808967 |
| 213681_at   | CYHR1     | 2.523908437 | -1.576098787 | -3.977929025 |
| 221754_s_at | CORO1B    | 1.847280532 | -1.580955087 | -2.920467555 |
| 212207_at   | MED13L    | 2.896167426 | -1.581195873 | -4.579407981 |
| 221800_s_at | C17orf70  | 2.132152521 | -1.586745192 | -3.38318276  |
| 47083_at    | C7orf26   | 2.048004027 | -1.58813589  | -3.252508698 |
| 212090_at   | GRINA     | 1.603021121 | -1.588404337 | -2.546245701 |
| 214779_s_at | SGSM3     | 3.35267845  | -1.588947694 | -5.327230693 |
| 203837_at   | MAP3K5    | 1.719865693 | -1.591168769 | -2.736596578 |
| 202667_s_at | SLC39A7   | 2.253552549 | -1.592769517 | -3.589389806 |
| 33814_at    | PAK4      | 1.799884909 | -1.594309729 | -2.869574023 |
| 213778_x_at | ZNF276    | 2.244270535 | -1.595641038 | -3.581050165 |
| 205406_s_at | SPA17     | 1.940940015 | -1.597062846 | -3.099803185 |
| 214679_x_at | GNA11     | 1.543037715 | -1.598688412 | -2.466836514 |
| 210384_at   | PRMT2     | 2.417527177 | -1.601317572 | -3.871228749 |
| 207556_s_at | DGKZ      | 1.348115106 | -1.601956515 | -2.159621777 |

|             |              |             |              |              |
|-------------|--------------|-------------|--------------|--------------|
| 220605_s_at | SIRT2        | 1.789729509 | -1.602004232 | -2.867154247 |
| 219818_s_at | GPATCH1      | 2.211039263 | -1.603954884 | -3.546407226 |
| 202648_at   | RPS19        | 1.712183054 | -1.606463517 | -2.750559611 |
| 218642_s_at | CHCHD7       | 1.354511456 | -1.606854854 | -2.176503308 |
| 203452_at   | B3GAT3       | 1.457260967 | -1.607786252 | -2.342964149 |
| 217679_x_at | None         | 3.07507401  | -1.608544538 | -4.946393503 |
| 32402_s_at  | SYMPK        | 4.996598388 | -1.609849611 | -8.04377197  |
| 221939_at   | CARM1        | 2.924939809 | -1.610742296 | -4.711324263 |
| 221176_x_at | WBSCR23      | 3.456460128 | -1.612775103 | -5.574492839 |
| 213076_at   | ITPKC        | 2.128609667 | -1.616678745 | -3.441278004 |
| 219730_at   | MED18        | 1.875978567 | -1.616766364 | -3.033019047 |
| 214879_x_at | USF2         | 2.681696112 | -1.616776742 | -4.335703904 |
| 206385_s_at | ANK3         | 1.387578305 | -1.617162472 | -2.243939561 |
| 203014_x_at | SGSM3        | 2.026310655 | -1.617552135 | -3.277663127 |
| 202785_at   | NDUFA7       | 1.519545403 | -1.617631241 | -2.458064116 |
| 209166_s_at | MAN2B1       | 1.566306144 | -1.617635697 | -2.533712732 |
| 213072_at   | CYHR1        | 2.22775777  | -1.618491149 | -3.605606234 |
| 201247_at   | SREBF2       | 1.451401088 | -1.619779498 | -2.350949726 |
| 38269_at    | PRKD2        | 3.068219564 | -1.624392051 | -4.983991471 |
| 214326_x_at | JUND         | 1.518758289 | -1.627277813 | -2.471441668 |
| 35179_at    | B3GAT3       | 1.932804739 | -1.628697701 | -3.147954636 |
| 203965_at   | USP20        | 1.662819451 | -1.629097436 | -2.708894904 |
| 219562_at   | RAB26        | 1.392132518 | -1.631493652 | -2.271255365 |
| 201473_at   | JUNB         | 1.475460638 | -1.63186138  | -2.407747233 |
| 212566_at   | MAP4         | 1.426349229 | -1.633192768 | -2.329503246 |
| 203249_at   | EZH1         | 1.301452365 | -1.634061302 | -2.126652945 |
| 212518_at   | PIP5K1C      | 1.780849207 | -1.634960572 | -2.911618237 |
| 218551_at   | RP5-1077B9.4 | 4.527257708 | -1.636612642 | -7.409367197 |
| 213311_s_at | TCF25        | 2.393321467 | -1.636796892 | -3.917381139 |
| 204175_at   | ZNF593       | 1.476536653 | -1.637666509 | -2.418074626 |
| 61874_at    | C9orf7       | 3.079239657 | -1.638228103 | -5.044496942 |
| 209468_at   | LRP5         | 2.16513818  | -1.643163682 | -3.557676425 |
| 204985_s_at | TRAPPC6A     | 1.786778235 | -1.644179069 | -2.937783375 |
| 220546_at   | MLL          | 1.589923989 | -1.646442797 | -2.617718899 |
| 221071_at   | None         | 1.519135536 | -1.646885932 | -2.501842944 |
| 210679_x_at | None         | 3.058317028 | -1.648361044 | -5.041210651 |
| 222378_at   | None         | 1.777012791 | -1.651606185 | -2.934925315 |
| 201333_s_at | ARHGEF12     | 1.46227928  | -1.654720052 | -2.419662847 |
| 221599_at   | C11orf67     | 1.622683437 | -1.654773106 | -2.68517291  |
| 218419_s_at | TMUB2        | 2.073619002 | -1.654857546 | -3.431544054 |
| 203010_at   | STAT5A       | 1.310080833 | -1.656049105 | -2.16955819  |
| 221593_s_at | RPL31        | 2.432281868 | -1.657915319 | -4.03251737  |
| 48106_at    | SLC48A1      | 1.333711686 | -1.66078655  | -2.215010429 |
| 201282_at   | OGDH         | 1.503905646 | -1.661403125 | -2.498593541 |
| 203379_at   | RPS6KA1      | 1.353985915 | -1.664678774 | -2.253951612 |
| 218131_s_at | GATAD2A      | 1.58574991  | -1.666123973 | -2.64205594  |
| 209513_s_at | HSDL2        | 1.774694715 | -1.667019634 | -2.958450933 |
| 40829_at    | WDTC1        | 2.720508179 | -1.667339371 | -4.536010396 |
| 212495_at   | JMJD2B       | 1.308227658 | -1.66897395  | -2.183397881 |
| 204978_at   | SFRS16       | 2.886561224 | -1.67492115  | -4.834762445 |
| 201621_at   | NBL1         | 1.44627046  | -1.677913963 | -2.426717399 |
| 217969_at   | C11orf2      | 1.452979201 | -1.680192358 | -2.44128455  |
| 213045_at   | MAST3        | 2.678898031 | -1.681778967 | -4.505314364 |
| 214246_x_at | MINK1        | 2.356884722 | -1.682239561 | -3.96484472  |
| 201353_s_at | BAZ2A        | 2.117118455 | -1.68765662  | -3.572968976 |
| 222332_at   | None         | 1.305872835 | -1.692275518 | -2.209896628 |
| 209675_s_at | HNRNPUL1     | 2.10725452  | -1.697887398 | -3.577880894 |
| 213766_x_at | GNA11        | 2.026100128 | -1.69791629  | -3.440148412 |
| 216067_at   | None         | 2.486837437 | -1.699649171 | -4.226751187 |
| 213204_at   | CUL9         | 2.605781472 | -1.700377384 | -4.430811884 |
| 217903_at   | STRN4        | 2.227871431 | -1.700860587 | -3.78929871  |



|             |                   |             |              |              |
|-------------|-------------------|-------------|--------------|--------------|
| 209367_at   | STXBP2            | 1.463551501 | -1.702880749 | -2.492253676 |
| 212032_s_at | PTOV1             | 1.613586781 | -1.707630081 | -2.755409326 |
| 209002_s_at | CALCOCO1          | 2.894256606 | -1.709420733 | -4.947502249 |
| 206580_s_at | EFEMP2            | 2.819999251 | -1.712859553 | -4.830262657 |
| 205727_at   | TEP1              | 1.449885589 | -1.713443454 | -2.484296972 |
| 204398_s_at | EML2              | 2.202556733 | -1.715589337 | -3.778682846 |
| 212303_x_at | KHSRP             | 1.382218028 | -1.716534413 | -2.372624812 |
| 212772_s_at | ABCA2             | 2.334900238 | -1.718604485 | -4.012770022 |
| 213705_at   | None              | 1.995659862 | -1.719413682 | -3.431364871 |
| 219742_at   | PRR7              | 2.080335259 | -1.71998455  | -3.578144504 |
| 217164_at   | None              | 1.757492686 | -1.721420608 | -3.025384127 |
| 206335_at   | GALNS             | 1.983984605 | -1.723773062 | -3.419939218 |
| 213147_at   | HOXA10            | 3.379927161 | -1.730275836 | -5.848206294 |
| 213244_at   | SCAMP4            | 2.615231786 | -1.73344941  | -4.533371996 |
| 221789_x_at | RHOT2             | 1.577813449 | -1.733839917 | -2.735675941 |
| 214149_s_at | ATP6V0E1          | 2.605176657 | -1.740888325 | -4.535321628 |
| 221831_at   | LUZP1             | 2.325935678 | -1.742677634 | -4.053356083 |
| 209820_s_at | TBL3              | 1.554465127 | -1.746695742 | -2.715177619 |
| 221588_x_at | ALDH6A1           | 2.169693336 | -1.747579401 | -3.791711381 |
| 218650_at   | DGCR8             | 2.398992778 | -1.749926966 | -4.198062152 |
| 219807_x_at | RAB4B             | 1.956887266 | -1.749948373 | -3.424451687 |
| 212553_at   | RPRD2             | 3.102904376 | -1.750110838 | -5.430426579 |
| 200623_s_at | CALM3             | 1.826847477 | -1.751774916 | -3.200225586 |
| 205130_at   | RAGE              | 1.366442438 | -1.752060879 | -2.39409034  |
| 209282_at   | PRKD2             | 3.652934574 | -1.757397049 | -6.41965644  |
| 204248_at   | GNA11             | 1.470590713 | -1.759082773 | -2.58689079  |
| 215148_s_at | APBA3             | 2.154357706 | -1.760972733 | -3.793765177 |
| 218476_at   | POMT1             | 1.824915132 | -1.762744833 | -3.21685972  |
| 218555_at   | ANAPC2            | 1.51621462  | -1.768695443 | -2.681721889 |
| 215555_at   | None              | 1.43000785  | -1.776781023 | -2.540810811 |
| 209587_at   | PITX1             | 2.01193101  | -1.778591016 | -3.578402419 |
| 221044_s_at | TRIM34            | 1.894374593 | -1.778947843 | -3.369993596 |
| 219154_at   | RHOF              | 1.329141408 | -1.780014228 | -2.365890616 |
| 214041_x_at | RPL37A            | 2.942767433 | -1.783879839 | -5.249543494 |
| 202801_at   | PRKACA            | 2.548967397 | -1.789107565 | -4.560376853 |
| 204650_s_at | APBB3             | 2.406480243 | -1.789282111 | -4.305872049 |
| 219233_s_at | GSDMB             | 1.326678938 | -1.792696642 | -2.378332877 |
| 64486_at    | CORO1B            | 1.362294664 | -1.794125054 | -2.444126988 |
| 213502_x_at | LOC91316          | 1.385426048 | -1.795327991 | -2.487294164 |
| 219223_at   | C9orf7            | 1.769167725 | -1.795983845 | -3.177396654 |
| 201314_at   | STK25             | 3.52863928  | -1.796257491 | -6.338344741 |
| 205182_s_at | ZNF324            | 1.894748547 | -1.796673483 | -3.404244471 |
| 40016_g_at  | MAST4             | 2.486977449 | -1.796855272 | -4.46873854  |
| 218780_at   | HOOK2             | 2.38561357  | -1.798324679 | -4.290107759 |
| 221010_s_at | SIRT5             | 1.778172562 | -1.798690889 | -3.198382787 |
| 219854_at   | ZNF14             | 1.50482631  | -1.798787861 | -2.706863299 |
| 205614_x_at | MST1              | 1.456304185 | -1.798937566 | -2.619800307 |
| 204193_at   | CHKB              | 1.484624666 | -1.801234537 | -2.674157224 |
| 219919_s_at | SSH3              | 1.553693581 | -1.804980809 | -2.804387097 |
| 37005_at    | NBL1              | 1.544365825 | -1.805770806 | -2.788770721 |
| 218466_at   | TBC1D17           | 2.040625583 | -1.812632588 | -3.698904431 |
| 91617_at    | TRMT2A            | 2.131795437 | -1.813293508 | -3.865570828 |
| 215390_at   | None              | 2.160553244 | -1.81346346  | -3.918084361 |
| 204611_s_at | PPP2R5B           | 1.549049038 | -1.816828052 | -2.814355745 |
| 213616_at   | C18orf10          | 2.134004231 | -1.817052934 | -3.877598649 |
| 213485_s_at | ABCC10            | 3.095723846 | -1.825708568 | -5.65188955  |
| 213771_at   | IRF2BP1           | 1.604736471 | -1.830646984 | -2.93770598  |
| 201673_s_at | GYS1              | 1.463391239 | -1.831145353 | -2.679682068 |
| 219095_at   | JMJD7-<br>PLA2G4B | 5.896601331 | -1.832569907 | -10.80593415 |
| 216109_at   | MED13L            | 1.887874731 | -1.833882707 | -3.462140821 |

|             |          |             |              |              |
|-------------|----------|-------------|--------------|--------------|
| 203777_s_at | RPS6KB2  | 2.269075121 | -1.836017303 | -4.166061183 |
| 219062_s_at | ZCCHC2   | 3.378532814 | -1.83839128  | -6.211065264 |
| 218771_at   | PANK4    | 2.170614379 | -1.840495598 | -3.99500621  |
| 203149_at   | PVRL2    | 1.462292209 | -1.841687014 | -2.693084571 |
| 212064_x_at | MAZ      | 3.01680862  | -1.845199743 | -5.566614489 |
| 201531_at   | ZFP36    | 1.847129985 | -1.846971796 | -3.411596987 |
| 203230_at   | DVL1     | 1.934794561 | -1.847817937 | -3.575148094 |
| 205372_at   | PLAG1    | 1.538177856 | -1.851064241 | -2.847266025 |
| 220015_at   | CASZ1    | 1.328123757 | -1.853666202 | -2.461898121 |
| 218857_s_at | ASRGL1   | 1.558753979 | -1.856866027 | -2.894397308 |
| 203926_x_at | ATP5D    | 1.411940375 | -1.858634289 | -2.624280796 |
| 218492_s_at | THAP7    | 1.361570715 | -1.859572914 | -2.531940021 |
| 215376_at   | None     | 1.511033367 | -1.86481488  | -2.817797507 |
| 221560_at   | MARK4    | 2.25603853  | -1.865806408 | -4.209331147 |
| 204522_at   | DOM3Z    | 1.43548043  | -1.87145628  | -2.686438866 |
| 221587_s_at | C19orf24 | 1.398929632 | -1.87533903  | -2.62346734  |
| 222234_s_at | DBNDD1   | 1.877414029 | -1.875759647 | -3.521577476 |
| 209936_at   | RBM5     | 1.574767938 | -1.875811527 | -2.95396785  |
| 203568_s_at | TRIM38   | 1.858355672 | -1.876050086 | -3.486368319 |
| 203752_s_at | JUND     | 2.239439065 | -1.876340232 | -4.201949615 |
| 46142_at    | LMF1     | 1.478765067 | -1.876967775 | -2.775594378 |
| 215873_x_at | ABCC10   | 2.377482817 | -1.879122565 | -4.46758161  |
| 221765_at   | UGCG     | 2.369805873 | -1.880058677 | -4.455374095 |
| 220312_at   | FAM83E   | 2.025311539 | -1.880674136 | -3.808951028 |
| 204804_at   | TRIM21   | 1.642510671 | -1.882375277 | -3.091821479 |
| 218910_at   | ANO10    | 1.693031374 | -1.883296287 | -3.188479701 |
| 221589_s_at | ALDH6A1  | 1.865071664 | -1.883716707 | -3.513266653 |
| 201050_at   | PLD3     | 1.707611641 | -1.884002236 | -3.217144152 |
| 210771_at   | PPARA    | 1.62407904  | -1.884268514 | -3.060200999 |
| 564_at      | GNA11    | 1.464635065 | -1.88542797  | -2.761463919 |
| 218274_s_at | ANKZF1   | 1.600190238 | -1.886040841 | -3.018024141 |
| 203469_s_at | CDK10    | 3.062190507 | -1.89219653  | -5.79426625  |
| 203652_at   | MAP3K11  | 1.920249977 | -1.894415069 | -3.637750494 |
| 217991_x_at | SSBP3    | 1.891299346 | -1.900100457 | -3.593658751 |
| 212448_at   | NEDD4L   | 1.459498901 | -1.911205699 | -2.789402618 |
| 202331_at   | BCKDHA   | 1.851316462 | -1.911251362 | -3.53833111  |
| 201206_s_at | RRBP1    | 1.777827407 | -1.912679622 | -3.400414253 |
| 213178_s_at | MAPK8IP3 | 2.807020873 | -1.913523655 | -5.371300839 |
| 204379_s_at | FGFR3    | 1.346769082 | -1.917085911 | -2.581872032 |
| 213326_at   | VAMP1    | 1.490365103 | -1.92337322  | -2.866528328 |
| 1487_at     | ESRRA    | 1.563123088 | -1.926953521 | -3.012065538 |
| 38157_at    | DOM3Z    | 1.389619288 | -1.941262893 | -2.697616358 |
| 200884_at   | CKB      | 1.961783098 | -1.941287723 | -3.808385444 |
| 203419_at   | MLL4     | 3.268278097 | -1.942351595 | -6.348145175 |
| 213041_s_at | ATP5D    | 1.396833494 | -1.94527489  | -2.717225122 |
| 203412_at   | LZTR1    | 2.000400539 | -1.94555865  | -3.891896571 |
| 202552_s_at | CRIM1    | 1.517512813 | -1.950332543 | -2.959654624 |
| 35148_at    | TJP3     | 1.350014694 | -1.954637249 | -2.638789007 |
| 221734_at   | PRRC1    | 1.780184182 | -1.955613317 | -3.481351893 |
| 209453_at   | SLC9A1   | 1.992400207 | -1.957937271 | -3.900994624 |
| 222319_at   | None     | 2.886204241 | -1.965627024 | -5.673201053 |
| 215544_s_at | UBOX5    | 1.440329009 | -1.967289068 | -2.833543515 |
| 218764_at   | PRKCH    | 1.701202991 | -1.980533899 | -3.369290192 |
| 218309_at   | CAMK2N1  | 2.118028254 | -1.983375668 | -4.200845704 |
| 57082_at    | LDLRAP1  | 1.714309801 | -1.986566939 | -3.405591175 |
| 202455_at   | HDAC5    | 2.692794147 | -1.990138402 | -5.359033041 |
| 204717_s_at | SLC29A2  | 1.668804901 | -1.991785255 | -3.323900994 |
| 209850_s_at | CDC42EP2 | 2.247969861 | -2.001881517 | -4.500169316 |
| 40562_at    | GNA11    | 2.079385851 | -2.008414859 | -4.17626944  |
| 219707_at   | CPNE7    | 2.305259847 | -2.008527107 | -4.630176891 |
| 91952_at    | LOC90379 | 2.034903447 | -2.012311926 | -4.094860474 |

|             |              |             |              |              |
|-------------|--------------|-------------|--------------|--------------|
| 220956_s_at | EGLN2        | 1.992608393 | -2.013235587 | -4.011590128 |
| 218022_at   | VRK3         | 3.397463701 | -2.013757784 | -6.841668974 |
| 213296_at   | RER1         | 1.987671662 | -2.014011213 | -4.003193015 |
| 212492_s_at | JMJD2B       | 2.119155307 | -2.014496664 | -4.269031295 |
| 221849_s_at | LOC90379     | 3.66192102  | -2.018209123 | -7.390522408 |
| 206956_at   | PMF1         | 2.821626243 | -2.023076611 | -5.708366058 |
| 217548_at   | LOC100129502 | 1.317327938 | -2.023091721 | -2.665075245 |
| 205310_at   | FBXO46       | 1.978317605 | -2.024921931 | -4.005938705 |
| 37462_i_at  | SF3A2        | 1.649568688 | -2.029496163 | -3.347793322 |
| 65635_at    | None         | 1.373263426 | -2.032644986 | -2.791357018 |
| 218547_at   | DHDDS        | 2.403288809 | -2.034323324 | -4.889066479 |
| 203154_s_at | PAK4         | 2.118122025 | -2.04071623  | -4.322485994 |
| 207498_s_at | CYP2D6       | 1.494791709 | -2.041704985 | -3.051923683 |
| 222025_s_at | OPLAH        | 1.452218223 | -2.043154595 | -2.967106335 |
| 207722_s_at | BTBD2        | 2.288634231 | -2.068008453 | -4.732914937 |
| 32259_at    | EZH1         | 2.650196948 | -2.06875483  | -5.482607735 |
| 216101_at   | LOC440248    | 2.626252627 | -2.075165344 | -5.449908436 |
| 56256_at    | SIDT2        | 2.606973648 | -2.08466365  | -5.4346632   |
| 218548_x_at | TEX264       | 1.858621314 | -2.087787047 | -3.880405504 |
| 222052_at   | C19orf54     | 2.280338389 | -2.093316993 | -4.773471099 |
| 221961_at   | CLCN7        | 1.364874905 | -2.096410255 | -2.861337747 |
| 205760_s_at | OGG1         | 1.357675019 | -2.097243025 | -2.847374463 |
| 58994_at    | CC2D1A       | 2.961773606 | -2.098107822 | -6.214120371 |
| 208165_s_at | PRSS16       | 2.01287509  | -2.103883796 | -4.234855285 |
| 221656_s_at | ARHGEF10L    | 1.886046868 | -2.108788622 | -3.977274174 |
| 202253_s_at | DNM2         | 1.957491474 | -2.113043606 | -4.136264843 |
| 210720_s_at | NECAB3       | 2.038121153 | -2.117442507 | -4.315604363 |
| 212771_at   | FAM171A1     | 1.56089198  | -2.118890474 | -3.307359147 |
| 213792_s_at | INSR         | 2.684805561 | -2.131889468 | -5.7237087   |
| 218944_at   | PYCRL        | 2.445592126 | -2.132028402 | -5.214071872 |
| 214250_at   | NUMA1        | 3.139460553 | -2.132424627 | -6.694662997 |
| 202700_s_at | TMEM63A      | 1.532321829 | -2.146179964 | -3.288638407 |
| 218068_s_at | ZNF672       | 2.492519907 | -2.146374573 | -5.349881353 |
| 202152_x_at | USF2         | 4.328393574 | -2.147087657 | -9.293440416 |
| 212719_at   | PHLPP        | 2.033021723 | -2.157232519 | -4.385700573 |
| 55616_at    | PERLD1       | 1.659640792 | -2.165741464 | -3.594352878 |
| 78047_s_at  | MT1P3        | 1.920205998 | -2.167613894 | -4.1622652   |
| 221640_s_at | LRDD         | 2.892444453 | -2.175461647 | -6.292401975 |
| 215066_at   | PTPRF        | 1.543368948 | -2.175492304 | -3.357587269 |
| 201204_s_at | RRBP1        | 1.82704092  | -2.179575511 | -3.982173646 |
| 218913_s_at | GMIP         | 1.363434298 | -2.183458156 | -2.977001737 |
| 210409_at   | C6orf124     | 1.421268292 | -2.186348225 | -3.107387408 |
| 213038_at   | RNF19B       | 1.542575931 | -2.191729985 | -3.380909922 |
| 208009_s_at | ARHGEF16     | 1.836677894 | -2.191909033 | -4.025830867 |
| 213526_s_at | LIN37        | 3.593649077 | -2.212542611 | -7.951101712 |
| 215591_at   | SATB2        | 1.701220379 | -2.213938983 | -3.766398116 |
| 202440_s_at | ST5          | 1.345085406 | -2.220440956 | -2.986682724 |
| 210874_s_at | NAT6         | 1.357114131 | -2.22171267  | -3.015117658 |
| 219341_at   | CLN8         | 1.495157025 | -2.22282877  | -3.323478052 |
| 204908_s_at | BCL3         | 1.498246532 | -2.224558786 | -3.332937485 |
| 52940_at    | SIGIRR       | 1.873462135 | -2.229992581 | -4.177806662 |
| 204418_x_at | GSTM2        | 1.804309984 | -2.230898281 | -4.025232041 |
| 220748_s_at | ZNF580       | 1.684651431 | -2.23631175  | -3.76740579  |
| 203815_at   | GSTT1        | 1.493737089 | -2.245821328 | -3.354666612 |
| 203718_at   | PNPLA6       | 1.822324942 | -2.250683321 | -4.101476354 |
| 209381_x_at | SF3A2        | 2.180343157 | -2.267029615 | -4.942902508 |
| 212873_at   | HMHA1        | 2.410168569 | -2.26709846  | -5.464089451 |
| 202551_s_at | CRIM1        | 1.764419032 | -2.288282725 | -4.037489591 |
| 220638_s_at | CBLC         | 1.721941354 | -2.290018924 | -3.943278287 |
| 40569_at    | MZF1         | 1.983436411 | -2.295503433 | -4.552985089 |
| 204506_at   | PPP3R1       | 2.497444922 | -2.300568803 | -5.745543873 |

|             |           |             |              |              |
|-------------|-----------|-------------|--------------|--------------|
| 218921_at   | SIGIRR    | 1.763854318 | -2.301444911 | -4.059413544 |
| 213435_at   | SATB2     | 1.434834722 | -2.311028117 | -3.315943385 |
| 203140_at   | BCL6      | 2.146265706 | -2.31718774  | -4.97330058  |
| 215314_at   | ANK3      | 3.15531488  | -2.32480591  | -7.335494679 |
| 213412_at   | TJP3      | 1.794375785 | -2.326116762 | -4.173927592 |
| 635_s_at    | PPP2R5B   | 1.592616057 | -2.327268228 | -3.70644475  |
| 213143_at   | C2orf72   | 1.893254749 | -2.331711107 | -4.414523057 |
| 210336_x_at | MZF1      | 1.746761333 | -2.338050338 | -4.084015924 |
| 205289_at   | BMP2      | 2.242102576 | -2.339404831 | -5.245185597 |
| 221256_s_at | HDHD3     | 1.404196865 | -2.343415423 | -3.29061659  |
| 221191_at   | STAG3L1   | 2.064698715 | -2.358957038 | -4.870535566 |
| 219513_s_at | SH2D3A    | 1.301540055 | -2.370360177 | -3.085118714 |
| 218208_at   | PQLC1     | 1.954837135 | -2.372838793 | -4.638513389 |
| 215737_x_at | USF2      | 3.40204127  | -2.376785762 | -8.08592325  |
| 219864_s_at | RCAN3     | 1.353500609 | -2.37780441  | -3.218359717 |
| 203110_at   | PTK2B     | 2.325736975 | -2.390046876 | -5.558620393 |
| 203468_at   | CDK10     | 2.593828517 | -2.395523449 | -6.213577036 |
| 212346_s_at | MXD4      | 3.908469171 | -2.39773697  | -9.371481027 |
| 36564_at    | RNF19B    | 1.424324951 | -2.399672509 | -3.417913428 |
| 219802_at   | PYROXD1   | 1.535393557 | -2.429941422 | -3.730916403 |
| 213820_s_at | STARD5    | 1.357206768 | -2.444302219 | -3.317423515 |
| 206374_at   | DUSP8     | 1.568237928 | -2.452565549 | -3.846206314 |
| 219373_at   | DPM3      | 2.949390434 | -2.455718628 | -7.242873031 |
| 204139_x_at | MZF1      | 1.786370291 | -2.463040064 | -4.399901597 |
| 202022_at   | ALDOC     | 1.415487323 | -2.479993294 | -3.51039907  |
| 207761_s_at | METTL7A   | 1.754809173 | -2.492950018 | -4.37465156  |
| 43544_at    | MED16     | 1.526430994 | -2.493275861 | -3.805813552 |
| 218086_at   | NPDC1     | 1.54271921  | -2.496470643 | -3.851353218 |
| 202821_s_at | LPP       | 2.993567954 | -2.551946238 | -7.639424477 |
| 213384_x_at | PLCB3     | 2.704644578 | -2.555041216 | -6.910478371 |
| 218546_at   | C1orf115  | 1.537648287 | -2.562912342 | -3.940857772 |
| 206453_s_at | NDRG2     | 1.50377893  | -2.564843825 | -3.856958104 |
| 216756_at   | None      | 2.302033948 | -2.568166572 | -5.912006633 |
| 209889_at   | SEC31B    | 1.39528962  | -2.625485784 | -3.663313061 |
| 209782_s_at | DBP       | 2.754461758 | -2.634516354 | -7.256674548 |
| 203365_s_at | MMP15     | 1.97614824  | -2.63762731  | -5.212342565 |
| 208094_s_at | CCDC130   | 3.403826159 | -2.657333313 | -9.045100643 |
| 213651_at   | INPP5J    | 1.336094241 | -2.665826322 | -3.561795197 |
| 207291_at   | PRRG4     | 1.414964049 | -2.667600532 | -3.77455885  |
| 215606_s_at | ERC1      | 3.965738868 | -2.670345904 | -10.58989454 |
| 202972_s_at | None      | 1.56527109  | -2.683109656 | -4.199793975 |
| 222364_at   | SLC44A1   | 1.44058192  | -2.696306777 | -3.884250794 |
| 218901_at   | PLSCR4    | 2.814177119 | -2.696343603 | -7.587988474 |
| 206043_s_at | ATP2C2    | 1.696449955 | -2.700315584 | -4.580950252 |
| 213931_at   | ID2       | 1.336439137 | -2.707074381 | -3.61784015  |
| 204241_at   | ACOX3     | 2.648369082 | -2.712910216 | -7.184787539 |
| 217047_s_at | None      | 1.347839143 | -2.722204968 | -3.669094412 |
| 204301_at   | KBTBD11   | 1.851086467 | -2.722358526 | -5.039321026 |
| 214965_at   | SPATA2L   | 2.249900446 | -2.732352081 | -6.147520168 |
| 215659_at   | GSDMB     | 2.860997046 | -2.737757857 | -7.832717141 |
| 218552_at   | ECHDC2    | 1.718321014 | -2.756029892 | -4.735744079 |
| 207394_at   | ZNF137    | 2.061292159 | -2.768679088 | -5.707056494 |
| 205166_at   | CAPN5     | 1.475709723 | -2.809963536 | -4.146690512 |
| 220609_at   | LOC202181 | 1.400330211 | -2.818470551 | -3.946789462 |
| 49679_s_at  | MMP24     | 2.381557522 | -2.852546783 | -6.793504247 |
| 218789_s_at | C11orf71  | 1.521622833 | -2.857469782 | -4.347991264 |
| 222109_at   | GNL3L     | 2.908716621 | -2.883322556 | -8.386768242 |
| 209588_at   | EPHB2     | 1.724482716 | -3.012776237 | -5.195480546 |
| 213686_at   | None      | 1.59221253  | -3.044419158 | -4.84736233  |
| 200649_at   | NUCB1     | 1.529376223 | -3.049640824 | -4.664048164 |
| 214797_s_at | PCTK3     | 2.070512079 | -3.076077317 | -6.369055242 |

|             |          |             |              |              |
|-------------|----------|-------------|--------------|--------------|
| 221953_s_at | MT1P3    | 2.290601047 | -3.114347528 | -7.133727709 |
| 203722_at   | ALDH4A1  | 1.692046662 | -3.181697726 | -5.383581015 |
| 202973_x_at | None     | 1.601036994 | -3.301633772 | -5.286037808 |
| 206539_s_at | CYP4F12  | 1.310354945 | -3.30570521  | -4.331647167 |
| 204916_at   | RAMP1    | 1.970671227 | -3.353876344 | -6.609387609 |
| 220326_s_at | FLJ10357 | 2.665093064 | -3.402337814 | -9.067546912 |
| 58780_s_at  | FLJ10357 | 2.361286421 | -3.48697091  | -8.233737062 |
| 204231_s_at | FAAH     | 2.813440938 | -3.501857127 | -9.852268198 |
| 205059_s_at | IDUA     | 2.708882688 | -3.57711066  | -9.689973139 |
| 216699_s_at | KLK1     | 1.799056981 | -3.642521745 | -6.553104174 |
| 202158_s_at | CUGBP2   | 2.35792462  | -3.644372431 | -8.593155481 |
| 202156_s_at | CUGBP2   | 3.889750038 | -3.653791668 | -14.21233628 |
| 203474_at   | IQGAP2   | 2.788321364 | -3.76088463  | -10.48655496 |
| 204897_at   | PTGER4   | 1.534532785 | -3.858789664 | -5.921439249 |
| 209354_at   | TNFRSF14 | 3.020767152 | -3.919820183 | -11.84086405 |
| 202620_s_at | PLOD2    | 1.523131358 | -4.042656919 | -6.157497523 |
| 202242_at   | TSPAN7   | 1.530337805 | -4.097474087 | -6.270519501 |
| 214719_at   | SLC46A3  | 1.451139677 | -4.186483694 | -6.075172595 |
| 203911_at   | RAP1GAP  | 2.292748105 | -4.205652432 | -9.642501642 |
| 211434_s_at | CCRL2    | 1.324889224 | -4.270815501 | -5.658357435 |
| 204600_at   | EPHB3    | 1.784309897 | -4.278768757 | -7.634649441 |
| 204057_at   | IRF8     | 1.840219164 | -4.387579036 | -8.074107027 |
| 202619_s_at | PLOD2    | 2.897827555 | -4.456204937 | -12.91331346 |
| 205259_at   | NR3C2    | 1.366758546 | -4.463925271 | -6.101108013 |
| 215028_at   | SEMA6A   | 1.363070202 | -4.486472649 | -6.115377178 |
| 205290_s_at | BMP2     | 4.600624389 | -4.709299373 | -21.66571755 |
| 207202_s_at | NR1I2    | 1.326178557 | -5.16482967  | -6.849486357 |
| 202157_s_at | CUGBP2   | 3.826380835 | -5.461321549 | -20.89709611 |
| 207655_s_at | BLNK     | 1.483299767 | -5.521282843 | -8.189717553 |
| 218625_at   | NRN1     | 1.792160656 | -5.676573284 | -10.1733313  |
| 212768_s_at | OLFM4    | 1.535156652 | -8.313186512 | -12.76204357 |

**Table S2.** IC50 values for 5Z-7-oxozeaenol (in  $\mu\text{M}$ ) for CRC cell lines used in this study, with corresponding genotypes for *KRAS*, *BRAF*, *APC* and *CTNNB1*. \* denotes *KRAS*-dependent cell lines. WT = wild-type; nd = not determined.

| Cell Line | IC50   | <i>KRAS</i> | <i>BRAF</i> | <i>APC</i> | <i>CTNNB1</i> |
|-----------|--------|-------------|-------------|------------|---------------|
| SKCO1     | 0.026  | G12V*       | WT          | del        | WT            |
| SW620     | 0.093  | G12V*       | WT          | del        | WT            |
| LoVo      | 0.106  | G13D*       | WT          | del        | WT            |
| SW1116    | 0.122  | G12A*       | WT          | del        | WT            |
| MDST8     | 0.226  | WT          | V600K       | nd         | WT            |
| RCM-1     | 0.277  | G12V*       | WT          | del        | WT            |
| CCK-81    | 0.412  | WT          | WT          | nd         | nd            |
| CL-40     | 0.482  | G12D*       | WT          | nd         | nd            |
| CL-34     | 0.489  | WT          | V600E       | nd         | nd            |
| COLO-206F | 0.509  | WT          | V600E       | nd         | nd            |
| COLO-678  | 0.774  | G12D*       | WT          | del        | WT            |
| CoCM-1    | 0.926  | WT          | WT          | WT         | WT            |
| RKO       | 1.103  | WT          | V600E       | del        | WT            |
| COLO-205  | 1.304  | WT          | V600E       | del        | WT            |
| C170      | 1.068  | G13D*       | WT          | nd         | WT            |
| CL-11     | 1.155  | V14I*       | WT          | nd         | WT            |
| SW1417    | 1.235  | WT          | V600E       | del        | WT            |
| HT115     | 1.329  | WT          | WT          | WT         | WT            |
| Caco-2    | 1.439  | WT          | V600E       | nd         | WT            |
| HT55      | 1.540  | WT          | WT          | del        | WT            |
| Gp5D      | 1.768  | G12D*       | WT          | del        | WT            |
| COLO-741  | 1.818  | WT          | V600E       | nd         | nd            |
| SW48      | 1.941  | WT          | WT          | WT         | S33Y          |
| SW948     | 2.321  | Q61L        | WT          | del        | WT            |
| HCC56     | 2.336  | G12V        | WT          | nd         | nd            |
| HCT-116   | 2.375  | G13D        | WT          | WT         | S45del        |
| SW1463    | 2.415  | G12C        | WT          | del        | WT            |
| WiDR      | 2.477  | WT          | V600E       | del        | WT            |
| T84       | 2.814  | G13D        | WT          | del        | WT            |
| Hs 257.T  | 3.204  | G13D        | WT          | nd         | nd            |
| H630      | 4.475  | WT          | WT          | del        | WT            |
| Hs 1.Int  | 5.639  | WT          | WT          | nd         | nd            |
| SW837     | 5.953  | G12C        | WT          | del        | WT            |
| CaR-1     | 6.077  | WT          | WT          | nd         | nd            |
| LS-174T   | 6.232  | G12D        | WT          | WT         | S45A          |
| LS-180    | 6.745  | G12D        | WT          | WT         | S45A          |
| HT29      | 7.885  | WT          | V600E       | del        | WT            |
| HCT-15    | 8.195  | G13D        | WT          | del        | WT            |
| DLD-1     | 8.233  | G13D        | WT          | del        | WT            |
| C2BBe1    | 9.318  | WT          | WT          | del        | WT            |
| HCT-8     | 47.318 | G13D        | WT          | del        | WT            |
| OUMS-23   | 48.392 | WT          | WT          | nd         | nd            |
| HRT-18    | 59.969 | G13D        | WT          | del        | WT            |
